# Supplementary material for: Spatiotemporal variability of snow depth across the Eurasian continent from 1966 to 2012
Source: Copernicus journal article supplement (doi:10.5194/tc-12-227-2018), 2018-01-22
Supplement: Supplementary file 1 [file data.xlsx]

## Sheet: long-term mean snow depth
station	Longitude	latitude	ele(m)	annual snow depth(cm)	maximum snow depth	september	october	november	december	january	february	march	april	may	june
20046	58	80.6	21	28.47	64.5	3.37	9.44	17.22	23.96	29.84	39.56	46.27	52.6	54.69	47.19
20069	76.98	79.5	10	14.97	37.18	2.69	8.98	12.68	15	17.48	19.77	22.84	27.02	30.31	19.3
20087	90.62	79.55	7	20.96	49.55	2.58	11.35	15.26	19.94	24.45	26.24	30.08	35.39	40.29	37.83
20289	96.4	77.2	9	25.11	55.76	2.02	12.26	20.58	24.46	30.25	34.53	39.28	43.19	47.93	40.73
20292	104.3	77.72	15	25.47	39.59	4.81	12.87	19.95	24.02	25.36	27.32	31.51	34.3	36.28	28.24
20476	88.9	75.42	10	8.46	25.45	0.76	4.21	6.33	8.1	9.88	11.2	12.73	16	18.65	8.22
20667	70.05	73.33	4	26.66	66.38	0.24	6.84	19.63	27.56	31.67	38.19	45.73	54.84	63	40.88
20674	80.4	73.5	42	13.98	35.21	1.12	8.82	14.7	16.93	16.01	17.8	20.74	24.25	27.86	12.26
20891	102.47	71.98	33	17.21	44.82	0.94	9.31	16.22	20.84	25	31.16	36.68	37.67	26.11	0.5
20982	94.5	70.97	37	31.61	75.07	1.03	12.95	24.5	36.68	46.16	52.96	59.87	64.58	65.53	11.75
21432	137.87	76	12	7.46	17.75	1.94	6.75	7.57	8.5	9.77	10.89	11.48	12.82	13.3	4.8
21611	118.67	73.55	12	7.91	23.77	0.47	5.68	9.17	9.63	9.81	10.11	11.42	13.17	17.7	7.09
21647	143.23	73.18	21	12.01	29.39	1	6.66	9.39	12.35	14.2	17.39	19.38	21.78	24.8	8.46
21802	114.08	71.97	18	17.2	42.1	0.91	9.94	16.52	21.07	24.66	27.38	32.02	35.87	34.77	6.55
21824	128.92	71.58	6	5.58	20.48	0.18	3.42	4.72	5.9	6.84	7.09	8.66	10.64	12.05	3.3
21908	113.97	70.13	62	19.99	49.28	1.5	12.59	23.27	29.93	33.5	36.43	39.81	41.52	25.11	0.32
21921	127.4	70.68	33	24.84	59	1.1	18.43	31.31	36.24	38.36	42.31	46.32	49.52	30.85	0.37
21931	136.22	70.77	23	13.79	31.44	0.68	11.06	18.03	22.28	24.21	25.64	27.3	27.4	10.33	0.17
21946	147.88	70.62	61	18.29	43.32	0.69	9.49	17.65	21.57	26.72	32	34.76	38.18	29.41	1.55
22003	31.98	69.93	8	13.94	58.23	0	1.84	8.97	19.35	30.58	35.16	38.22	33.46	6.62	0
22019	33.48	69.2	32	22.11	72.03	0.03	3.25	16.63	31.61	44.99	50.58	57.39	46.2	6.29	0.01
22028	35.12	69.2	33	12	57.9	0.06	3.37	15.32	21.32	32.66	33.93	34.28	30.9	3.8	0.02
22095	49.08	69.53	23	22.62	67.17	0	3	11.35	23.94	33.84	42.65	49.28	54.72	41.27	4.75
22101	28.8	69	99	19.81	67.24	0.01	2.48	14.27	26.15	41.67	49.93	55.62	44.86	6.18	0.01
22106	31.8	68.6	63	42.19	72.55	16.5	9.14	19.32	38.46	50.74	57.67	64.84	55	25.81	7
22113	33.05	68.97	51	10.46	43.34	0.04	2.18	10.36	18.94	23.56	22.96	24.56	17.26	1.5	0.01
22119	33.3	68.35	143	39.85	71.83	12	12.65	21.97	36.32	48.36	59.33	64.27	56.64	26.86	7
22127	35.03	68	162	27.04	45.93	2	6.12	17.19	25.38	34.4	36.4	43.4	45.7	22.32	NaN
22140	39.8	68.15	12	17.03	63.2	0	1.36	9.12	17.14	29.77	39.54	44.48	46.42	13.72	0.03
22165	43.3	68.65	48	25.16	83.93	0	1.18	7.01	18.97	37.72	52.29	63.65	71.31	46.59	2.85
22204	30.45	67.57	246	26.93	85.76	0.06	4.16	18.65	37.56	53.35	66.24	73.39	60.46	7.17	0.02
22212	32.92	67.93	132	36.19	65.39	NaN	6.84	17.96	33.23	41.98	50.43	58.5	46.34	14.59	NaN
22217	32.35	67.15	26	19.45	67.66	0.01	1.01	9.71	25.81	42.12	52.13	59.74	40.04	1.37	0
22235	37.05	67.35	156	22.32	69.11	0.02	2.56	14.56	29.25	42.3	51.86	59.34	51.93	10.17	0.01
22249	39.67	67.13	149	25.36	76.57	0.01	2.08	14.56	31.4	45.96	56.65	65.91	61.64	16.12	0.02
22271	44.13	67.88	8	26.23	81.4	0	0.74	9.57	26.88	44.87	57.5	69.78	74.74	33.94	0.09
22292	48.68	67.68	4	10.28	36.86	0.01	2.01	5.93	11.39	18.6	22.67	27.18	24.69	9.55	0.19
22318	33	66.07	94	31.18	61.59	3	4.8	16.47	30.59	42.55	50.08	52.75	36.67	10.15	NaN
22324	34.35	66.68	40	25.08	84.5	0	1.11	10.81	30.5	51.95	65.26	74.4	58.77	4.13	0
22349	39.53	66.18	9	44.23	90.43	NaN	9.19	14.41	22.61	43.99	67	81.09	75.01	37.27	15.5
22355	40.68	66.48	15	12.48	52.79	0	0.41	3.53	10.31	17.07	26.64	35.42	37.98	8.39	0
22383	47.78	66.77	9	31.44	56.44	9.33	6.53	15.82	26.49	36.48	46.67	51.59	46.04	23.91	NaN
22408	31.17	65.22	120	22.36	75.1	0	1.83	10.22	25.37	44.67	58.37	66.04	46.3	3.01	0
22422	34.77	65.9	9	19.55	70.54	0	0.71	8.2	24.55	40.88	55.94	57.97	44.88	5.64	0
22438	36.82	65.2	26	2.62	16.24	0	0.14	1.74	3.91	5.56	7.26	7.78	3.59	0.08	0
22471	44.22	65.87	19	16.9	56.43	0	2.99	10.93	24.26	35.92	43.68	46.98	29.02	1.86	0
22499	49.58	65.23	155	57.36	98.65	3	13.85	27.74	44.39	68.13	84.14	90.56	74.02	30.9	11
22511	32.12	64.75	97	30.11	68.08	NaN	4.25	10.24	23.19	40.07	49.65	54.32	36.75	15.75	NaN
22518	32.78	64.08	159	28.65	57.43	5.13	3.82	12.03	25.13	37.58	49.12	51.19	36.58	15.27	NaN
22520	34.8	64.98	7	8.43	35.59	0	0.47	6.95	13.42	18.63	24.21	26.2	11.86	0.23	0
22522	34.8	65	10	17.81	35.59	NaN	7.07	8.14	13.63	18.63	24.29	26.31	16.67	39.95	NaN
22525	34.92	64.57	9	40	64.81	NaN	21.8	24.05	30.33	41.81	55.79	54.79	36.38	17.64	NaN
22541	38.4	64.83	5	37.14	57.17	NaN	14	18.38	30.65	40.93	48.65	49.98	37.15	16.56	NaN
22550	40.73	64.5	8	15.04	55.82	0	1.59	10.8	24.05	34.97	43.36	46.49	17.17	0.35	0
22559	41.67	64.22	12	26.98	49.38	1	8.1	13.16	24.39	33.11	41.93	43.33	22.79	10.67	NaN
22563	43.38	64.7	31	33.25	68.83	1.67	4.8	14.48	30.03	41.83	52.4	55.18	38.04	20.35	NaN
22573	45.77	64.9	71	55.26	88.36	NaN	19.18	24.55	47.76	65.25	77.07	83.06	69.06	30.35	NaN
22583	47.65	64.75	64	25.94	78.83	0	3.21	16.52	35.18	54.76	65.82	72.54	54.76	7.91	0
22602	30.82	63.83	182	19.13	67.44	0	1.5	9.65	23.96	41.63	54.61	57.94	35.91	0.93	0
22619	33.42	63.27	128	12.78	52.28	0	0.7	5.9	15.72	25.03	38.49	41.56	21.24	0.55	0
22621	34.28	63.77	112	27.36	53	2.88	5.36	10.86	24.19	34.46	45.08	47.85	26.08	3.9	NaN
22641	38.12	63.9	13	15.37	61.55	0.01	1.17	10.72	22.54	36.64	47.67	51.16	16.98	0.23	0
22648	39.23	63.12	34	20.8	38.28	NaN	5.95	10.86	19.36	26.14	33.4	31.2	14.65	13.75	NaN
22656	41.8	63.48	18	27.35	52.48	1.33	4.94	10.99	25.49	34.12	43.36	46.61	26.97	11.5	NaN
22676	45.63	63.58	62	16.09	60.32	0.02	1.86	8.84	24.75	37.91	49.47	51.83	22.75	0.19	0
22686	47.92	63.45	80	40.05	73.38	10	8.67	18.96	35.41	48.92	60.44	64.54	47	20	NaN
22695	48.9	63.45	158	57.56	92.03	NaN	23.22	25.98	50.08	70.5	79.46	86.44	69.88	29.25	NaN
22721	34.43	62.92	81	30.5	56.81	NaN	5.83	8.91	23.15	37.58	46.48	51.66	34.1	10.63	NaN
22723	35.7	62.97	139	38.33	72.39	2.25	6.98	14.6	32.32	48.68	60.93	65.34	49.27	20.6	NaN
22727	34.3	62.17	38	17.55	36.23	NaN	3.28	7.79	15.88	24.56	30.78	28.38	7.18	3.5	NaN
22738	36.88	62.23	147	42.31	75.75	NaN	4.91	14.85	36.4	54.43	64.8	69.15	44.2	11.58	NaN
22762	42.78	62.82	34	33.32	67.52	2	5.27	13.03	31.58	45.72	56.48	56.92	33.72	11.41	NaN
22768	42.9	62.1	45	16.65	62.48	0.01	1.11	9.13	23.85	40.68	52.21	52.44	15.72	0.1	0.01
22778	45.02	62.23	58	41.69	80.62	3.5	6.66	16.76	36.45	52.35	66.88	68.8	51.4	17.78	NaN
22798	49.12	62.17	92	39.16	77.31	5	5.07	15.67	33.73	49.74	61.39	66.96	50.05	18.82	NaN
22802	30.72	61.72	19	11.69	52.29	0	0.23	5.22	14.94	26.93	39.56	39.87	12.98	0.01	0
22816	33.62	61.68	133	28.93	50.09	NaN	7.29	10.83	19.39	35.89	43.18	43.24	25.39	16.67	NaN
22820	34.27	61.82	110	24.99	43.65	NaN	6.67	10.85	20.77	28.83	34.45	37.75	21.5	9.78	NaN
22831	36.58	61.8	44	35.56	67.42	NaN	7.53	13.36	31.19	45.11	56.25	55.38	33.99	14.87	NaN
22833	37.75	61.78	116	27.53	52.33	NaN	7.4	12.66	25.78	36.59	44.9	45.54	19.29	8.33	NaN
22837	36.45	61.02	56	10.54	46.17	0	0.51	7.69	17.85	27.68	35.41	30.82	4.38	0.05	0
22845	38.93	61.52	126	13.49	51.89	0	0.89	7.46	20.73	34.17	42.65	43.03	12.78	0.14	0
22854	40.18	61.67	233	21.7	77.41	0.02	1.69	11.91	30.99	50.61	64.73	67.76	28.16	0.62	0
22867	42.07	61.08	91	27.99	54.21	2	7.65	9.34	23.94	38.83	47.67	45.16	24.43	12.29	NaN
22887	46.72	61.27	56	16.27	61.93	0	1.14	10.1	24.88	39.44	50.6	50.41	12.35	0.05	0
22892	28.71	60.7	10	10.03	51.37	0	0.12	3.24	11.67	21.46	35	35.8	8.92	0	0
22907	27	60.1	6	4.37	30.48	0	0	1.19	4.2	9.74	16.51	18.09	1.41	0	0
22912	32.98	60.98	12	20.29	40.5	NaN	5.17	8.95	17.56	26.27	33.89	30.34	13.81	6	NaN
22925	34.78	60.63	111	25.21	51.43	NaN	5.19	11.18	23.92	33.38	45.07	42.79	15.71	2.33	NaN
22939	37.75	60.02	131	18.87	40.17	NaN	4	7.35	15.76	24.88	34.51	30.61	9.32	3	NaN
22954	40.2	60.47	202	38.71	79.14	2	8.7	13.75	34.19	50.31	62.02	66.27	41.86	12.18	NaN
22981	46.3	60.77	99	17.53	67.89	0	1.08	8.62	25.56	41.23	54.25	54.67	13.76	0.04	0
22996	49.65	60.37	152	38.53	75.14	1	5.6	15.01	33.47	49.97	60.8	63.81	38.57	11.22	NaN
23032	66.8	69.72	24	10.37	30.11	0.06	3.31	10.35	12.92	14.8	15.35	18.01	20.27	17.04	1.98
23058	76.9	69.08	2	22.37	49.75	0.2	10.75	27.89	34.28	35.12	38.24	40.51	43.1	34.52	3.95
23074	86.17	69.4	19	44.18	103.14	0.53	13.99	40.94	58.61	70.54	80.45	90.06	91.76	76.43	7.49
23078	88.25	69.33	64	30.38	52.28	3.58	15.26	29.44	32.44	35.65	36.26	41.15	39.25	32.37	5.71
23114	55.5	68.55	5	20.33	62.64	0.01	1.77	9.01	19.22	28.17	36.64	46.68	52.85	40.76	7.07
23146	73.58	68.47	2	43.16	105.32	0.09	6.17	23.56	43.07	55.54	72.84	79.37	87.01	84.2	40.16
23205	53.03	67.63	12	23.37	70.97	0.03	4.64	17.22	31.31	45.41	53.84	60.17	54.61	18.53	0.1
23207	51.13	67.02	18	32.83	57.45	1.5	8.24	17.18	28.6	39.14	46.19	52.54	46.63	19.22	NaN
23219	59.38	67.08	83	29.5	81.97	0.05	6.74	21.79	38.12	51.69	62.17	68.81	63.78	35.49	3.68
23220	64.07	67.05	113	32.25	90.53	0.16	8.85	26.01	37.92	53.89	64.86	75.23	74.29	38.02	2.98
23226	64.02	67.48	172	27.51	45.21	3.67	12.91	25.08	31.9	35.47	35.83	37.57	32.45	17.63	8.7
23242	72.88	67.68	11	26.74	68.13	0.06	7.74	25.72	35.73	43.21	48.68	54.47	59.45	48.05	6
23256	78.73	67.47	8	14.44	40.07	0.12	6.26	16.88	22.4	25.53	27.9	30.53	30.21	14.35	0.59
23274	86.57	67.47	31	32.12	82.45	0.24	10.75	28.77	44.52	54.74	62.19	71.46	71.16	42.03	0.4
23305	52.55	66.25	22	43.04	71.26	NaN	8.47	21.54	37.72	53.7	62.27	66.71	60.05	27.77	31.34
23324	60.77	66.43	62	20.16	61.93	0.1	6.56	20.48	31.08	38.67	44.63	50.7	42.36	9.13	0.46
23330	66.68	66.5	16	21.61	58.96	0.13	6.53	20.41	32.12	41.57	47.91	50.76	45.28	18.87	1.25
23331	65.67	66.9	890	17.35	54.16	3.04	18.83	25.65	24.4	23.7	23.54	24.89	26.54	23.76	8.86
23345	72.9	66.6	5	18.59	49.41	0.09	5.27	17.31	23.48	29.23	34.49	40.1	38.11	21.17	0.41
23365	82.3	66.6	34	23.37	60.79	0.14	8.73	24.84	34.58	40.88	46.82	51.14	50.8	27.94	0.77
23383	93.47	66.88	278	32.82	77.39	0.16	12.01	29.27	45.86	56.78	65.73	70.11	68.3	44.12	0.95
23405	52.27	65.43	68	23.75	71.44	0.02	4.63	17.21	33.39	47.19	58.16	62.78	46.62	4.61	0.01
23412	56.92	65.97	78	22.03	68.43	0.04	4.18	16.07	31.89	46.33	55.41	58.84	44.21	6.4	0.02
23418	57.1	65.12	59	28.9	87.86	0.02	4.47	21.67	41.68	61.08	72.79	78.01	57.07	9.95	0.01
23426	64.72	65.48	19	48.12	86.89	20.67	16.06	28.72	39.64	53.95	72.09	72.57	66.6	35.71	32.54
23445	72.67	65.47	19	29.89	83.4	0.02	7.23	25.8	41.6	56.56	66.96	71.38	68.78	23.91	0.11
23463	84.27	65.98	41	35.5	86.78	0.32	11.4	34.46	50.49	62.7	70.79	77.61	76.89	34.29	0.21
23472	87.93	65.78	38	38.64	104.38	0.33	8.84	30.39	53.53	69.11	84.93	93.28	89.23	33.62	0.02
23514	55.4	64.52	156	28.62	86.07	0.15	5.27	23.02	42.4	60.3	72.6	78.15	54.81	3.5	0.01
23518	57.62	64.27	75	63.39	105.48	NaN	12.82	34.03	59.21	81.56	93.63	98.75	84.87	31	14.33
23527	60.88	64.28	29	26.41	75.5	0.26	8.37	24.02	41.51	52.58	62.24	63.28	45.16	6.87	0
23552	77.82	64.92	27	31.61	88.89	0.14	6.22	23.4	42.45	56.93	68.47	76.93	76.67	28.59	0.03
23589	93.78	64.2	105	27.92	75.34	0.08	6.34	25.05	45.43	56.38	64.47	66.73	59.54	13.55	0
23606	53.82	63.55	137	45	76.89	NaN	9.1	20.33	39.03	55.52	65.77	70.7	53.9	21.71	NaN
23625	62.1	63.65	28	42.19	68.73	79	10.35	21.44	37.77	51.67	56.96	60.22	46.57	25.35	NaN
23631	65.05	63.93	32	21.53	66.04	0.05	5.32	20.3	34.9	47.25	53.32	57.68	39.72	4.26	0.01
23656	78.32	63.38	66	25.36	71.04	0.23	4.73	24.27	39.07	49.59	58	61.85	55.19	14.87	0.07
23662	82.08	63.98	33	30.66	83.54	0.16	6.51	27.74	46.68	60.11	70.33	74.97	65.69	20.05	0.01
23678	87.95	63.15	46	35.49	97.79	0	6.29	29.27	53.83	70.02	81.27	88.54	76.44	19.05	0
23701	50.9	62.98	103	42.37	79.31	17	8.44	18.01	36.24	54.4	66.14	69.42	49.86	19.51	NaN
23707	50.42	62.23	106	24.13	82.93	0.02	1.99	12.63	31.43	52.64	68.46	73.77	41.58	0.92	0
23711	56.2	62.7	139	26.82	86.62	0.08	3.63	19.18	43.4	61.03	73.43	76.38	42.65	1.66	0
23724	60.87	62.43	51	19.81	62.13	0.04	4.35	16.13	32.84	46.4	53.33	51.99	24.08	0.55	0
23734	66.05	62.45	72	30.47	88.59	0.03	5.82	27.35	47.81	67.7	74.81	79.95	58.5	5.65	0
23803	53.68	61.68	144	45.65	82.89	8	7.75	19.78	40.61	57.84	68.45	73.6	53.84	19.84	NaN
23804	50.78	61.68	119	24.25	88.21	0.02	2.13	13.9	35.63	56.03	72.76	76.62	35.11	0.25	0
23813	57.92	61.8	174	63.21	111.32	11	10.27	30.42	54.96	82.53	96.83	101.01	75.23	30.79	NaN
23867	80.25	61.1	55	23.4	73.57	0.03	2.94	17.95	35.83	50.04	60.84	65.6	44.44	3.62	0
23884	90.02	61.6	58	34.29	97.57	0.03	5.16	28.83	54.86	73.26	83.29	88.82	68.78	10.1	0
23891	96.37	61.67	262	33.7	89.83	0.04	7.87	31.93	54.28	67.21	75.41	80.09	69	12.22	0
23904	50.97	60.45	124	20.2	70.21	0	1.36	10.73	30.91	48.96	60.76	60.9	22.32	0.11	0
23909	54.35	60.28	198	48.49	90.08	11.13	9.14	23.03	43.18	63.39	77.69	81.47	57.35	21.09	22
23914	56.52	60.4	207	28.27	90.34	0.11	2.24	16.29	40.54	63.53	77.12	82.52	41.79	0.41	0
23915	57.13	60.5	523	91.6	153.61	3	15.31	46.56	86.32	115.27	135.7	143.06	106.11	42.83	NaN
23921	60.45	60.68	95	15.46	52.68	0.07	2.74	13.96	28.72	38.58	45.23	41.46	14.57	0.27	0
23929	64.22	60.32	53	33.4	54.69	60	6.17	18.44	29.73	43.56	47.52	48.7	30.12	17.63	NaN
23933	69.03	61.02	46	17.42	60.83	0.04	2.31	14.17	27.85	40.92	49.32	52.73	19.92	0.44	0
23946	74.02	60.5	47	22.45	69.28	0	2.84	19.27	37.27	51.26	60.53	62.22	33.67	1	0
23955	77.87	60.43	48	18.21	56.82	0.02	2.65	15.7	31.48	42.49	48.02	49.78	26.76	1.19	0.01
23966	84.08	60.35	99	29.01	81.76	0.02	4.03	25.18	45.88	61.41	70.54	75.29	57.11	6.43	0.03
23973	89.63	61.03	49	34.9	57	5.5	7.49	21.28	35.78	43.69	48.16	51.74	37.47	14.63	NaN
23975	88.37	60.35	86	49.89	76.72	NaN	7.97	29.52	47.75	65.35	71.31	73.46	57.36	22.19	NaN
23986	93.03	60.38	511	38.5	109.83	0.32	8.89	35.01	58.63	70.69	81.09	93.16	88.28	26.83	0.03
23987	90.23	60.25	58	55.31	86.66	4	12.54	30.84	51.73	68.16	81.17	85.49	66.49	51.86	NaN
24076	139.67	69.33	282	14.9	34.62	1.28	11.93	19.87	21.08	24.96	26.4	27.44	29.02	12.48	0.1
24105	102.37	68.47	271	17.56	52.27	0.72	9.71	17	23.15	26.16	29.7	32.87	41.02	29.57	0.54
24125	112.43	68.5	220	21.31	55.21	0.73	9.79	21.73	29.6	34.52	38.39	42.03	46.49	34.23	0.57
24136	118.33	68.62	77	18.85	43.31	0.46	10.39	22.74	29.74	33.57	36.26	39.45	36.77	14.28	0.12
24143	124	68.73	39	19.91	49.34	0.55	13.4	22.9	28.06	33.13	36.98	42.99	41.73	15.74	0.08
24266	133.4	67.57	137	8.86	25.55	0.13	4.17	10.47	14.28	18.09	20.74	22.19	16.39	1.14	0
24329	114.28	66.25	236	16.67	41.6	0.52	9.53	19.4	25.67	30.49	34.03	35.35	33.38	10.94	0
24343	123.4	66.77	92	24.43	60.97	0.31	13.35	27.33	36.05	42.63	46.75	51.7	53.38	18.89	0
24371	136.68	66.8	274	21.96	106.6	10.4	6.17	12.74	16.79	20.37	23.11	24.78	23.5	17.88	34.97
24382	143.23	66.45	196	8.7	25.46	0.7	4.3	9.97	14.59	18.57	21.38	22.75	17.08	1.61	0.03
24507	100.23	64.27	168	17.78	50.59	0.06	5.61	19.65	31.92	40.02	44.82	45.32	25.31	0.68	0
24538	116.92	64.23	137	16.71	42.76	0.2	7.35	20.83	28.14	34.52	38.69	38.64	32.38	4.21	0
24585	143.2	64.57	523	23	31.62	7	10.52	17.14	22.38	26.73	29.52	30.29	24.34	14	NaN
24598	148.03	64.17	845	32.23	55.55	19.33	12.09	20.38	28.72	35.99	40.96	47.18	46.32	30.1	NaN
24606	103.97	63.58	209	17.53	47.21	0.27	6.24	18.94	29.14	35.12	39.88	41.78	36.01	4.66	0
24639	118.33	63.28	119	27.68	47.2	6	7.96	17.71	25.44	33.64	40.67	43.5	37.71	19.05	NaN
24641	121.62	63.78	111	18.13	47.36	0.14	6.76	21.37	32	37.57	41.08	44.02	30.19	1.03	0
24643	124.83	63.95	76	15.88	41.83	0.1	8.41	21.2	26.25	28.17	30.96	32.24	28.95	4.48	0
24652	127.47	63.97	96	42.74	61.61	7.67	21.86	37	43.93	50.02	52.39	55.02	48.21	20.58	NaN
24656	129.48	63.52	79	37.42	54.7	7	17.15	31.74	39.44	44.96	47.11	49.81	45.47	23.04	NaN
24661	130.3	64	211	16.88	52.7	0.68	15.89	27.22	31.77	32.58	31.81	31.9	28.72	1.87	0
24671	135.87	63.95	402	20.19	93.17	10.36	7.74	13.74	16.31	18.27	19.45	21.37	20.21	17.82	31.7
24679	139.6	63.22	1286	11.08	30.19	1.61	8.3	13.95	16.02	16.96	19.82	19.1	21.51	16.25	0.09
24688	143.15	63.25	745	12.49	30.83	0.22	5.98	14.66	20.05	24.39	27.56	30.17	23.95	1	0
24713	108.43	62.88	246	19.77	52.57	0.2	7.54	21.01	32.57	39.33	43.72	47.38	41.8	6.24	0
24724	112.5	63.03	422	52.97	78.53	2	17.25	40.61	52.59	60.55	64.91	70.69	72.92	41.03	NaN
24726	113.9	62.5	351	21.55	58.36	0.41	7.11	22.53	35.43	44.15	50.13	54.42	42.45	4.12	0
24738	117.65	62.15	133	15.84	43.72	0.04	4.19	16.43	26.01	33.23	37.82	40.33	28.57	0.64	0.01
24763	134.4	62.8	119	15.14	39.03	0.07	7.46	21.35	26.61	31.06	34.44	35.44	24.3	0.14	0
24768	132.6	62.03	186	24.34	38.24	4.17	8.89	20.76	25.98	30.61	33.22	35.05	24.66	7.32	NaN
24790	148.17	62.78	655	8.22	24.03	0.87	7.57	13.62	16.24	17.6	16.8	16.56	8.24	0.33	0.01
24802	102.7	61.7	357	25.02	69.39	0.1	6.89	24.34	40.11	50.99	57.96	60.33	52.51	9.6	0
24817	108.02	61.27	291	19.32	51.9	0.07	5.47	20.13	31.71	39.54	44.69	48.27	39.35	5.38	0
24856	129.15	61.48	115	22.15	36.31	1.33	6.33	15.13	23.26	27.23	30.87	32.11	24.1	9.54	NaN
24891	147.35	61.88	670	35.79	52.59	10.59	16.67	29.52	36.21	41.43	46.59	49.21	46.08	27.17	15
24908	102.27	60.33	260	20.87	57.79	0.03	5.26	19.83	34.9	44.7	50.68	52.73	38.58	3.32	0
24918	107.97	60.07	292	35.49	53.04	NaN	10.35	23.17	34.07	41.98	46.15	49.6	42.36	21.19	NaN
24923	114.88	60.72	234	22.9	72.17	0.05	5.69	19.38	37.66	48.9	56.83	62.53	44.81	3.29	0
24933	119.3	60.95	247	14.93	39.93	0.05	4.43	15.19	24.89	31.06	35.87	36.78	27.83	1.26	0
24944	120.42	60.4	226	16.97	50.34	0.06	3.84	15.27	26.9	36.35	42.23	46.37	26.38	0.32	0.01
24951	125.32	60.82	118	14.18	43.36	0.01	2.94	11.67	21.11	28.33	34.91	37.41	34.45	2.19	0
24959	129.72	62.02	101	12.48	34.77	0.03	3.98	15.39	21.74	26.31	30.5	31.5	19.31	0.15	0
24962	131.98	60.9	146	23.5	35.76	2	5.55	17.02	24.46	29.76	33.37	33.6	22.59	14	NaN
24966	134.45	60.38	170	17.48	47.79	0.06	5.53	20.52	30.76	37.6	43.5	43.68	20.22	0.14	0
24967	130	60.47	173	12.94	37.9	0.03	3.3	12.5	22.17	28.81	32.61	33.19	22.33	0.38	0
24982	142.78	60.72	398	12.34	42.55	0.1	7.6	18.28	20.26	22.11	23.72	23.14	25.15	5.3	0.02
24988	142.33	60.08	198	34.24	58.57	9	12.78	25.16	35.48	35.28	40.35	43.37	40.19	23.93	NaN
25034	162.3	69.62	24	8.96	25	0.67	6.2	10.72	12.55	13.65	15.36	17.38	19.27	15.5	0.27
25042	167.98	69.93	13	7.12	18.7	0.77	4.98	7.62	9.58	10.9	13.16	13.37	14.05	9.93	0.06
25062	175.77	69.88	2	15.96	40.21	0.75	6.31	15.67	20.56	23.76	27.98	30.8	33.19	30.13	2.52
25123	161.28	68.75	28	36.79	54.05	3.63	16.21	25.8	33.97	43.13	46.67	51.44	50.44	22.1	NaN
25138	164.17	68.12	94	12.7	36.13	0.64	5.65	13.53	19.12	23.2	26.63	30.18	26.85	4.51	0
25173	179.5	68.9	3	34.11	75.44	0.97	18.72	38.22	48.56	56.14	59.78	58.93	61.71	50.7	8.52
25206	153.72	67.45	21	19.47	49.93	0.78	8.28	21.36	29.65	36.14	42.35	46.31	41.2	4.28	0.01
25248	168.97	67.25	353	15.77	43.43	0.3	5.23	14.45	21.33	28.79	33.9	34.26	33.43	18.61	0.01
25282	175.8	67.83	3	18.43	54.83	2.93	4.16	11.02	16.68	26.13	30.5	36.34	38.52	40.15	7.58
25325	159.42	66.55	127	18.78	48.69	0.36	5.44	17.74	27.1	34.57	41.37	43.75	40.91	16.28	0
25356	173.33	66.38	77	15.17	47.62	0.12	6.25	15.94	19.34	25.23	30.27	34.09	31.89	15.88	0.04
25378	179.1	66.35	26	8.9	44.82	0.01	2.23	9.6	11.53	13.53	18.29	21.57	16.76	6.69	0.03
25399	169.8	66.17	5	30.08	85.93	3.04	4.27	11.51	22.07	38.46	48.32	62.16	71.53	64.75	14.29
25400	150.9	65.73	43	17.12	46.69	1.01	9.53	21.12	26.46	32.45	39.42	41.04	30.41	1.27	0
25428	160.53	65.23	264	18.46	44.25	0.38	7.58	19.94	27.37	32.85	37.57	40.14	39.1	11.1	0
25503	153.97	64.75	98	22.1	56.1	0.43	7.24	22.54	32.33	40.83	48.51	51.92	46.77	13	0
25526	161.03	64.1	373	40.71	60.14	3.5	8.98	28.75	38.41	45.45	53.44	55.91	55.24	41.5	NaN
25538	164.23	64.22	326	24.22	66.21	0.12	5.9	21.17	30.8	42.25	48.68	54.37	55.74	35.23	0.28
25551	170.42	64.68	26	32.28	86.52	0.03	7.4	28.31	41.49	54.91	64.31	71.48	72.75	34.97	0.02
25563	177.57	64.78	64	7.94	26.57	0.06	2.07	6.08	10.67	15.63	16.33	16.88	17.37	5.8	0.01
25594	173.25	64.42	39	27.34	86.6	0.01	1.62	18.33	31.32	47.01	54.19	66.05	69.3	31.9	0.21
25621	158.92	64	683	19.54	46.52	1.24	9.2	21.77	29.27	33.99	38.92	40.64	40.15	21	0.01
25656	172.7	63.4	200	17.53	50.35	0.11	6.26	16	20.26	27.62	32.88	39.79	39.78	25.15	0.34
25677	179.32	63.05	3	14.21	53.63	0.06	3.43	9.55	17.74	24.79	31.18	34.96	33.47	17.22	0.06
25703	152.42	62.92	205	20.73	59.13	0.35	6.21	21.19	31.66	41.56	50.21	52.86	40.82	2.32	0
25705	152.32	62.45	260	31.96	86.97	1.39	13.17	35.8	48.9	60.58	71.69	78.32	67.61	9.21	0
25715	155.78	62.5	542	40.99	65.79	10.4	10.2	28.07	38.41	48.38	57.54	62.15	51.12	25.76	NaN
25744	166.08	62.48	10	27	74.38	0.01	5.62	24.38	41.31	47.75	54.6	58.83	60.72	24.56	0.01
25767	175.2	62.05	11	27.91	94.36	0.02	1.68	8.15	23.4	43.2	56.22	64.48	66.37	35.83	0.05
25777	179.1	62.4	4	21.84	69	0	0.95	6.19	15.86	29.14	40.97	51.93	57.22	48.96	3.81
25821	158.97	61.95	23	19.98	39.45	NaN	8.79	16.67	22.19	20.4	21.49	20.12	25.97	21.73	21
25902	151.77	60.85	901	30.65	42.35	11.75	13.53	23.73	32.5	35.22	37.84	37.97	37.53	25.06	6.5
25912	151.28	59.57	4	3.43	23.76	0.01	1.43	6.3	8.41	7.52	5.66	4.99	2.08	0.26	0
25913	150.78	59.55	115	10.36	45.25	0.01	4.51	17.62	22.65	21.69	18.86	17.25	13.1	3.11	0.01
25916	151.35	58.83	64	8	33.56	0	0.57	6.84	13.42	13.61	14.63	17.08	18.82	6.99	0.05
25922	155.88	60.72	34	7.99	33.54	0	2.81	14.99	17.62	16.14	16.74	15.05	12.76	4.25	0
25927	154.27	59.65	7	23.41	70.63	0	2.63	19.86	34.44	42.58	45.77	50.99	53.81	25.83	0.59
25932	160.4	60.68	45	6.15	32.39	0	1.05	8.61	14.55	13.66	14.14	12.28	12.41	2.77	0
25954	166	60.35	4	11.69	47.66	0	0.92	7.74	14.63	21.82	26.43	31.31	29.77	4.81	0
25956	169.67	60.43	5	34.1	105.46	0	0.74	8.14	29.31	49.49	68.82	84.38	96.15	56.85	0.46
26038	24.58	59.38	33	3.15	21.58	0	0.01	2.05	4.63	8.73	12.61	13.06	0.45	0	0
26059	28.6	59.37	19	13.58	27.76	NaN	7.21	8.36	13.25	15.57	20.87	16	3.92	NaN	NaN
26063	30.3	59.97	6	4.57	30.55	0	0.1	3.92	8.24	13.12	18.16	13.51	0.4	0	0
26069	30.13	59.35	90	7.31	43.97	0	0.14	3.65	10.81	17.24	26.81	24.13	2.19	0.01	0
26078	31.23	59.35	39	13.54	29.3	3	3.92	7.35	12.58	16.46	21.7	18.05	3.29	NaN	NaN
26092	34.2	59.95	91	33.09	64.78	NaN	3.22	10.56	27.92	43.78	54.46	54.21	30.78	4	NaN
26094	33.55	59.65	61	11.76	55.85	0	0.53	6.28	18.73	31.75	41.76	36.31	4.66	0	0
26099	34.7	59.5	176	32.6	63.89	2	4.64	10.87	26.78	39.38	51.84	51.6	29.46	13.25	NaN
26157	27.83	58.73	40	6.75	35.66	0	0.11	1.74	7.06	13.84	22.16	16.77	0.96	0.01	0
26167	29.8	58.57	91	19.59	43.82	NaN	8.43	7.61	13.93	21.24	32.25	28.33	17.25	28.75	NaN
26179	31.25	58.52	24	15.7	32.57	NaN	5.6	8.77	13.87	18.84	22.78	17.17	5.56	NaN	NaN
26196	34.53	58.9	164	22.27	43.74	NaN	2.86	8.66	17.85	29.11	38.53	35.06	13.71	2.67	NaN
26231	24.5	58.37	8	2.47	19.26	0	0	0.99	5.16	6.63	9.91	6.21	0.21	0	0
26233	25.6	58.37	86	12.69	29	NaN	1.67	3.62	9.29	14.12	18.72	17.88	9.92	NaN	NaN
26238	25.38	57.9	12	10.1	21.16	NaN	2	6.91	7.82	10.92	12.57	12.43	10.06	NaN	NaN
26242	26.73	58.3	68	10.36	24.89	NaN	2.58	3.55	9.39	10.72	15.12	15.32	4.15	NaN	NaN
26247	26.03	57.78	66	11.77	27.26	NaN	1.67	6.21	9.32	12.77	18.03	15.23	8.31	NaN	NaN
26258	28.3	57.8	45	4.77	31.3	0	0.08	2.36	8.02	13.16	18.72	11.62	0.47	0	0
26264	29.1	58.27	129	16.57	41.97	4.5	4.38	7.62	14.56	20.14	29.94	25.27	8.86	1	NaN
26268	29.95	57.82	71	13.13	32.38	NaN	3.41	5.37	10.74	14.53	20.6	18.55	9.11	1.5	NaN
26275	31.32	58.02	25	4.77	31.1	0	0.06	2.18	8.14	12.4	17.75	11.79	0.43	0	0
26283	33.32	58.37	176	23.5	47.35	NaN	6.69	8.97	21.78	33.33	40.77	32.95	9.69	4.5	NaN
26285	32.53	58.27	63	18.27	44.07	NaN	3.95	5.71	13.37	22.4	32.18	26.86	11.46	3.5	NaN
26291	33.9	58.42	89	14.3	32.3	3	6.25	5.91	13.09	19.47	24.01	19.18	8.48	1	NaN
26298	34.05	57.9	188	9.46	45.34	0	0.41	4.93	13.94	25.63	35.92	28.32	2.23	0.02	0
26318	22.55	57.18	79	12.58	30.95	NaN	2	6.25	9.81	11.47	17.79	20.26	9.21	NaN	NaN
26335	25.33	57.32	122	8.83	20.47	NaN	1	4.05	6.33	9.22	13.71	14.34	3.16	9	NaN
26348	26.72	57.13	143	12.29	27.7	NaN	1	5.51	8.75	12.46	20.44	16.21	6.18	4	NaN
26359	28.9	57.02	108	5.83	36.77	0	0.17	2.32	9.35	14.63	21.42	13.05	0.85	0	0
26378	31.18	57.15	71	17.06	37	NaN	5.75	7.74	12.23	18.79	27.11	20.31	6.51	4	NaN
26381	32.47	57.65	62	13.49	29.24	1	2.06	6	10.96	14.75	22.99	17.62	4	NaN	NaN
26389	33.12	57.13	218	19.36	40.07	1	3.94	6.99	15.31	25.04	33.3	26.94	8.78	4.5	NaN
26393	34.57	57.55	169	16.41	35.39	1.5	3.88	5.2	13.68	22.13	27.92	23.23	11.39	3.25	NaN
26406	21.02	56.48	7	1.38	17	0	0.01	0.51	2.7	5.69	4.8	3.18	0.05	0	0
26422	24.05	56.98	26	2.5	22.9	0	0	1.4	4.83	7.92	10.62	4.58	0.07	0	0
26477	30.62	56.35	106	3.88	26.72	0	0.05	2.77	8.34	12.44	15.54	8.52	0.27	0	0
26479	31.63	56.48	187	7.26	39.61	0	0.1	2.56	10	18.63	28.15	20.42	0.86	0	0
26498	34.32	56.27	196	13.92	31	NaN	2.59	5.22	11.82	18.8	23.21	18.27	4.67	NaN	NaN
26499	34.93	56.5	186	6.52	34.52	0	0.19	3.07	9.64	16.6	24.67	18.58	0.94	0	0
26524	23.32	55.93	107	9.04	21.56	NaN	1	2.82	4.94	10.47	17.33	12.28	4.19	1	NaN
26531	24.77	56.2	62	7.72	20.39	NaN	2.5	2.92	5.86	9.98	15.2	11.41	2.67	2	NaN
26544	26.62	55.87	122	9.46	24.85	2	0.75	3.94	8.43	10.47	18	16.65	3.55	5	NaN
26554	27.95	55.82	132	11.89	23.75	NaN	2.5	5.08	8.28	11.98	17.94	15.62	5.8	4	NaN
26585	32.95	55.85	222	14.97	32.1	7	4.33	5.32	11.16	17.85	25.5	20.66	5.22	4	NaN
26614	21.93	55.08	37	1.89	19.44	0	0.02	0.76	3.4	5.81	8.04	3.39	0.11	0	0
26629	23.83	54.88	770	1.69	16.52	0	0.01	0.37	3.15	6.36	7.04	3.52	0.07	0	0
26633	25.6	55.53	106	12.38	29.47	NaN	9.19	5.86	8.18	13.45	17.15	14.52	24.75	22.17	NaN
26643	27.47	55.37	131	11.18	23.05	NaN	3.67	4.23	8.6	11.49	16.59	14.74	5.97	NaN	NaN
26645	26.32	55.05	212	14.98	32.19	NaN	1.5	3.69	10.41	14.95	24.96	22.26	7.31	NaN	NaN
26653	28.77	55.47	133	13.92	27.25	NaN	1.75	5.17	9.42	16.64	20.55	16.49	6.99	0	NaN
26659	28.7	54.88	174	9.21	21.63	NaN	1.67	2.92	7.19	10.2	15.12	9.25	7.25	NaN	NaN
26666	30.22	55.17	208	12.01	29.6	NaN	1	5.47	10.07	14.69	19.82	13.62	4.17	NaN	NaN
26668	29.68	54.82	176	9.4	22.57	NaN	2.83	4.05	8.45	10.19	13.33	13.6	7.36	NaN	NaN
26695	34.4	55.17	251	15.47	33.4	2	2.85	5.43	13.46	20.64	27.17	22.13	6.05	2	NaN
26701	19.9	54.65	4	0.64	14.67	0	0	0.57	0.97	2.51	2.68	0.76	0.01	0	0
26702	20.62	54.72	21	2.18	24.21	0	0.04	1.64	5.84	9.38	9.2	4.05	0.11	0	0
26706	21.3	54.38	49	1.43	18.37	0	0.01	0.96	2.42	5.01	6.08	1.89	0.14	0	0
26730	25.1	54.63	156	3.42	26.57	0	0.01	0.82	4.55	10.28	15.22	9.56	0.14	0	0
26745	26.9	54.48	183	9.62	20.95	NaN	1.33	3.15	6.64	12.11	15.69	11.06	5.25	NaN	NaN
26759	28.5	54.27	189	20.26	40.1	NaN	4.05	7.98	17.16	24.63	26.48	36.44	29.77	NaN	NaN
26763	30.42	54.5	185	15.23	31.75	NaN	9.76	7.43	14.18	14.97	17.52	20.35	25.38	22.17	NaN
26774	30.93	54.3	205	10.88	26.81	NaN	3.5	5.13	9.36	12.68	17.95	17.1	6.83	NaN	NaN
26781	32.07	54.75	239	7.34	38.27	0	0.35	4.75	11.93	19.12	25.88	22.95	1.41	0	0
26795	34.02	54.42	238	15.26	36.96	NaN	2.5	4.37	12.46	19.37	25.45	21.68	11.67	NaN	NaN
26825	24.05	53.6	134	8.6	22.32	NaN	0.75	2.64	7.14	11.73	9.54	14.09	3.13	NaN	NaN
26832	25.32	53.85	157	10.1	22.45	NaN	2	2.73	7.7	14.3	14.88	13.58	5.72	NaN	NaN
26836	25.85	53.6	280	11.85	24.45	NaN	2	4.4	8.34	15.08	15.75	12	13.33	NaN	NaN
26846	27.08	53.62	190	9.42	19.6	NaN	2	2.5	7.08	11.24	13.09	9.19	12.25	NaN	NaN
26850	27.63	53.93	228	3.46	27.08	0	0.04	1.26	6.05	10.43	17.06	8.99	0.22	0	0
26853	28.98	53.83	154	11.7	27	NaN	2	4.81	9.31	13.11	20.64	15.9	7.81	NaN	NaN
26855	28.13	53.45	177	8.54	19.67	NaN	0	2.45	6.41	10.75	12.76	11.16	17.75	NaN	NaN
26863	30.07	53.95	192	14.18	30.57	NaN	7.5	7.93	13.01	14.61	17.75	19.17	19.89	18	NaN
26864	29.33	53.5	155	8.7	21.33	NaN	0.5	3.83	6.9	8.92	13.12	13.75	8.79	NaN	NaN
26878	31.02	53.45	170	13.94	30.95	NaN	1.33	4.98	9.9	12.1	21.86	21.63	10.72	NaN	NaN
26882	32.83	53.93	224	11.41	23.07	NaN	1.63	5.61	9.22	13.21	16.17	15.04	8.21	NaN	NaN
26887	32.07	53.35	167	16.49	40.45	NaN	1.67	3.49	9.1	14.36	28.91	27.1	15.45	NaN	NaN
26894	33.75	53.53	177	11.47	26.79	NaN	1.5	4.78	9.71	13.45	18.3	14.47	8.91	1	NaN
26896	34.73	53.75	193	14.57	34.13	NaN	4.92	5.65	10	16.71	21.55	18.71	12.24	NaN	NaN
26898	34.32	53.25	216	6.88	34.83	0	0.07	2.1	8.4	16.74	23.9	18.8	0.65	0	0
26923	24.45	53.17	183	11.83	30.57	NaN	3	3.91	7.52	12.44	17.73	20.01	12.33	NaN	NaN
26938	25.35	52.72	156	7.93	18.25	NaN	1	3.05	5.79	8.53	10.73	11.96	4.83	NaN	NaN
26941	26	53.12	193	8.86	17.6	NaN	NaN	5.05	6.41	9.06	9.91	10.01	8.25	NaN	NaN
26951	27.55	53.03	162	7.15	13.53	NaN	NaN	3.04	5.7	8.32	8.56	8.84	9.5	NaN	NaN
26961	29.18	53.22	156	11.43	26.86	NaN	NaN	3.61	7.42	12.38	18.62	16.56	8.75	NaN	NaN
26966	30.03	52.9	142	7.43	16.45	NaN	0.67	3.45	5.16	8.08	11.46	9.26	7.67	NaN	NaN
26974	30.9	52.92	142	8.81	23.42	NaN	1	4.61	6.21	7.06	14.13	9.78	9.83	NaN	NaN
26976	31.6	53.02	148	1.36	13.96	0	0.02	0.86	2.83	3.93	5.75	2.74	0.07	0	0
26997	33.77	52.58	178	4	25.03	0	0.07	1.56	6.65	10.1	14.04	8.88	0.19	0	0
27008	35.93	59.4	136	12.21	55.34	0	0.26	5.26	17.22	32.18	44.26	41	7.69	0.05	0
27026	39.33	59.6	133	17.79	33.83	3	3.19	6.04	14.43	22.58	30.23	27.21	12.52	1	NaN
27037	39.92	59.32	131	10.58	46.9	0	0.59	5.42	16.64	27.59	36.44	33.74	3.61	0.02	0
27051	42.75	59.88	134	14.73	62.37	0	0.88	5.79	19.99	37.71	51.93	49.34	12.42	0.06	0
27066	45.47	59.53	136	17.15	64.43	0	1.25	7.73	24.99	41.38	53.38	55.36	15.22	0.1	0
27083	48.28	59.85	183	18.17	65.57	0.01	1.55	9.66	28.76	42.67	56.14	56.54	17.74	0.1	0
27097	48.98	59.38	213	44.71	89.21	2.5	6.88	17.56	41.02	60.4	73.58	76.23	49.31	17.03	5
27108	35.63	58.57	145	26.55	51.18	NaN	5.64	7.66	20.54	33.49	43.38	40.92	19.37	NaN	NaN
27113	38.02	59.27	114	30.48	58.17	NaN	2.65	10.12	25.7	39.38	49.58	45.83	26.22	NaN	NaN
27143	42.28	59.08	142	33.37	63.28	9	5.44	11.77	26.5	43.31	54.35	58.42	32.14	12.5	NaN
27164	44.32	58.82	152	17.33	64.69	0	0.82	7.26	23.33	42.31	55.54	54.77	16.38	0.04	0
27196	49.7	58.5	164	35.94	64.03	NaN	7.56	11.12	26.23	43.46	54.56	51.72	25.86	NaN	NaN
27199	49.32	58.52	157	16.82	64.03	0.01	1.46	10.1	26.23	43.46	54.56	51.67	9.13	0.05	0
27208	35.9	57.8	140	8.67	44.24	0	0.41	4.7	14.46	23.16	31.5	24.31	1.97	0.01	0
27217	36.7	57.8	147	15.25	29.52	3	3.2	7.58	14.81	20.2	23.2	20.54	19.73	4.5	NaN
27225	38.68	58.1	105	11.93	52.46	0	0.47	5.55	16.93	30.67	40.32	34.84	3.45	0	0
27242	41.53	58.48	97	28.31	58	4	5.42	7.86	20.68	36.81	46.94	46.83	23.07	6.33	NaN
27243	42.37	58.38	132	21.96	44.31	3	4.68	8.24	19.35	29.17	39.12	33.47	14.42	NaN	NaN
27252	43.38	58.35	144	34.67	71.59	2.5	5	9.84	27.15	46.08	58.47	57.44	30.99	14.33	NaN
27271	45.53	58.37	125	30.27	53.46	NaN	8.28	10.57	24.85	38.98	48.84	45.53	19.79	7	NaN
27277	45.77	57.85	136	14.64	58.86	0	0.61	6.81	20.56	37.86	49.14	48.21	9.92	0.01	0
27281	47.12	58.3	166	36.09	73.21	1.92	3.95	11.24	29.92	47.44	60.37	60.73	32.9	6	NaN
27283	48.35	58.3	127	26.72	47.86	NaN	5.03	10.33	21.19	34.36	43.66	41.71	23.05	NaN	NaN
27296	49.9	58.1	175	13.56	50.61	0	1	7.09	18.76	31.64	41.09	42.9	11.46	0.02	0
27316	37.58	57.35	138	16.61	31.28	14	1.36	5.09	13.82	21.67	28.73	22.44	6.94	NaN	NaN
27321	38.3	57.5	122	19.02	46.79	20	5.6	5.77	14.89	26.72	33.5	29.17	10.12	NaN	NaN
27329	39.42	57.2	102	18.21	36.62	4.5	3.21	7.45	15.2	24.75	31.09	24.13	7.62	NaN	NaN
27331	39.75	57.63	129	17.18	35.18	5.5	4.19	7.43	14.09	21.89	30.1	23.27	8.48	NaN	NaN
27333	40.85	57.77	126	11.92	50.86	0.01	0.72	5.22	17.42	32.59	39.8	37.12	7.26	0.01	0
27346	42.18	57.42	128	26.48	51.3	4	5.33	9.78	19.63	33.07	43.97	40.04	19.11	27	NaN
27355	43.12	57.33	132	25.4	54.89	6.75	4.38	6.89	19.29	32.73	44.18	39.72	19.35	2.5	NaN
27369	45.17	57.13	111	27	50.14	NaN	5.59	10.01	20.7	34.74	43.46	39.84	16.89	5	NaN
27373	46.63	57.67	176	30.25	62.79	2	2.77	8.98	21.77	38.37	50.07	50.7	26.92	20	NaN
27385	47.92	57.37	103	11.26	46.5	0	0.5	4.76	13.26	28.24	37.19	36.91	6.56	0.03	0
27393	49.95	57.55	136	33.44	61.46	NaN	3.44	10.19	24.1	41.27	53.42	53.83	32.84	NaN	NaN
27402	35.87	56.88	137	16.99	37.2	3	3.68	5.67	13.81	22.16	28.93	23.52	8.27	NaN	NaN
27412	37.38	56.87	123	19.31	41.55	7.5	2.59	5.57	14.52	26.93	35.84	30.74	13.64	NaN	NaN
27417	36.75	56.35	167	16.71	35.89	3	5.5	5.5	13.01	21.7	29.55	19.03	9.17	2	NaN
27425	38.8	56.7	174	8.41	39	0.01	0.42	4.45	13.72	23.51	31	25.04	1.54	0	0
27428	38.75	56.4	185	20.55	40.66	2	6.53	7.92	17.45	28.54	34.29	29.21	14.93	NaN	NaN
27441	41.4	56.85	98	20.79	44.48	6.25	2.79	6.42	16.6	27.51	35.61	31.63	13.41	6	NaN
27453	43.43	56.68	103	22.71	46.33	4	4.07	8.42	17.48	31.15	38.53	34.19	15.19	4	NaN
27462	44.52	56.73	118	28.83	58.64	1	3.92	7.24	19.21	37.83	49.03	45.39	20.94	NaN	NaN
27479	46.58	56.33	114	20.28	40.28	1	4.34	9.31	15.09	24.78	33.33	31.51	15.45	NaN	NaN
27480	47.32	56.98	92	23.87	53.75	1.25	2.68	7.45	16.22	30.14	39.06	39.09	24	1	NaN
27485	47.88	56.72	106	10.11	47.93	0	0.41	4.98	13.01	23.99	35.71	35.26	5.33	0	0
27491	48.73	57	143	17.67	33.14	NaN	4.53	7.94	12.95	22.73	29.01	28.39	16.94	NaN	NaN
27502	35.93	56.02	198	16.41	33.69	8	4.55	5.51	11.85	20.24	29.93	20.66	9.61	NaN	NaN
27507	35.03	55.52	194	15.83	36	NaN	1.89	4.78	12.85	19.87	25.31	23.24	11.1	NaN	NaN
27509	36	55.52	185	7.76	40.4	0	0.26	2.66	11.89	20.6	29.5	24.07	1.41	0	0
27511	36.82	55.9	162	19.02	41.88	NaN	4.9	6.17	14.96	26	33.56	26.73	8.39	NaN	NaN
27523	38.68	55.77	135	19.24	41.48	NaN	6.2	6.3	14.68	24.03	32.43	28.03	11.03	NaN	NaN
27532	40.35	56.12	170	25.56	62.64	4	5.43	6.62	20.78	34.09	44.19	40.68	23.89	NaN	NaN
27539	40.65	55.6	136	21.89	44.89	NaN	4.19	5.88	16.86	28.99	37.91	31.69	13.12	5	NaN
27549	42.03	55.6	119	17.08	33.69	NaN	4.54	7.69	15.83	21.72	28.96	23.32	9.5	NaN	NaN
27577	45.5	55.53	125	17.82	31.54	9	3.82	6.83	13.37	23.17	27.61	24.47	12.52	NaN	NaN
27581	47.33	56.08	163	16.85	36.43	1	2.5	5.01	14.09	22.88	31.37	28.3	10.54	2	NaN
27587	47.47	55.52	183	13.75	26.17	1	3.69	5.99	12.17	18.37	21.39	17.57	5.25	NaN	NaN
27595	49.3	55.8	116	12.19	50.96	0	0.33	5.23	15.09	28.08	40	40.2	7.25	0	0
27606	36.48	55.02	197	16.83	33.14	1	4.3	4.86	13.9	20.38	27.38	23.15	7	NaN	NaN
27611	36.7	55.38	193	20.02	43.26	1	3.82	5.68	14.76	24.98	34.18	31.08	12.74	NaN	NaN
27612	37.62	55.83	156	8.86	46.75	0	0.47	4.15	13.15	24.05	33.87	26.85	1.53	0	0
27618	37.47	54.93	166	15.53	31.88	NaN	1.98	3.29	12.24	19.79	25.43	19.51	8.11	NaN	NaN
27625	38.73	55.13	114	7.9	41.86	0	0.47	3.03	10.3	19.87	28.58	21.22	1.51	0	0
27627	38.15	54.83	221	19.79	43.54	2	4.06	5.95	13.81	24.39	33.98	29.47	11.55	NaN	NaN
27643	42.12	55.33	114	16.43	30.9	NaN	4.75	5.12	13.68	18.64	26.23	21.1	15.79	NaN	NaN
27648	41.77	54.95	136	7.66	39.79	0	0.34	3.86	11.6	20.59	29.56	25.2	1.82	0	0
27653	43.78	55.37	127	14.93	26.34	NaN	2.86	5.46	10.73	18.04	23.54	21.59	12.1	NaN	NaN
27665	44.5	55.03	220	8.94	41.17	0	0.45	3.72	12.99	26.16	33.72	30.38	2.82	0.01	0
27675	46.33	55.18	136	7.18	33.64	0	0.29	2.62	9.7	17.7	25.95	23.94	2.03	0	0
27679	46.58	54.82	180	16.73	33.45	NaN	2.96	5.75	12.45	23.44	27.29	26.67	12.56	NaN	NaN
27697	48.78	54.93	156	17.29	30.68	NaN	5.83	6.96	10.99	19.43	25.9	27.54	19.54	NaN	NaN
27703	36.4	54.57	201	24.29	47.79	NaN	4	4.96	19.18	30.48	39.24	36.23	13.75	NaN	NaN
27707	35.35	54.1	239	4.73	23.25	0	0.25	2.38	7.08	11.01	15.15	9.79	0.68	0	0
27719	37.62	54.23	204	16.74	42.04	NaN	3.57	3.98	12.57	19.57	27.95	23.66	12.65	1.5	NaN
27729	39.03	54.23	166	11.66	25.86	NaN	2.75	3.88	9.52	15.14	18.92	14.45	7.79	NaN	NaN
27730	39.7	54.63	155	6.36	29.11	0	0.51	3.83	9.58	16.19	22.99	16.29	0.89	0	0
27731	39.72	54.62	160	11.9	23.67	NaN	4.58	4.34	8.99	15.57	19.1	14.27	5.08	NaN	NaN
27736	40.88	54.3	99	14.2	29.14	NaN	4.33	4.84	12.33	16.83	21.7	16.39	8.79	NaN	NaN
27745	41.97	54.35	115	13.63	27.14	NaN	3.17	5.06	11.14	16.53	23.02	18.19	4.14	NaN	NaN
27752	43.23	54.63	139	20.08	45.86	NaN	2.7	5.86	15.19	26.45	35.74	32.01	14.3	NaN	NaN
27756	43.8	54.4	185	8.91	46.6	0	0.19	2.85	13.44	22.53	34.26	31.14	3.45	0	0
27758	43.25	54.08	198	15.2	27.86	NaN	4.2	5.39	12.1	17.88	24.84	21.1	9.27	NaN	NaN
27760	45.23	54.13	201	19.51	36.62	NaN	6.59	7.18	14.96	25.63	31.54	28.06	15.52	NaN	NaN
27776	46.7	54.48	100	16.4	31.96	NaN	3.63	5.68	11.83	20.46	26.45	21.32	13.25	NaN	NaN
27799	49.6	54.23	73	22.58	42.64	NaN	2.67	5.55	11.66	27.91	41.21	37.63	16.55	NaN	NaN
27814	37.23	53.65	240	6.43	35.67	0	0.25	3.34	10.07	16.91	23.82	16.2	1.44	0	0
27817	36.53	53.38	201	15.67	31.11	NaN	3.83	4.98	11.7	17.43	25.15	19.96	12.86	NaN	NaN
27821	38.13	54	231	14.54	29.04	NaN	5.9	5.07	11.36	17.03	24.04	19.66	7.33	NaN	NaN
27823	39.25	53.78	210	6.5	36.41	0	0.11	2.98	7.96	14.68	25.84	21.31	1.98	0	0
27835	40.12	53.72	127	14.08	27.55	NaN	4.13	4.81	11.3	17.11	21.39	15.55	4.56	NaN	NaN
27848	41.8	53.45	144	16.25	33.66	NaN	5.33	5.08	12.27	19.61	28.09	24.3	11.03	NaN	NaN
27853	43.68	53.87	148	13.96	26.5	NaN	3.36	5.04	10.52	18.59	22.52	17.13	10.17	NaN	NaN
27857	42.63	53.48	133	6.31	33.93	0	0.2	2.87	10.22	18.03	25.27	19.1	1.04	0	0
27858	43.32	53.33	261	20.2	35.89	NaN	3.63	7.73	14.39	22.07	30.42	29.68	15.23	NaN	NaN
27872	46.4	53.85	175	9.59	47.36	0	0.38	3.07	11.84	27.61	37.66	35.81	5.69	0	0
27891	48.8	53.97	85	14.58	29.36	NaN	3.88	4.13	9.14	18.09	24.16	20.69	8.88	NaN	NaN
27894	48.83	53.6	143	18.83	33.93	NaN	5.14	6.47	12.19	20.27	29.01	30.22	15.72	NaN	NaN
27906	36	52.93	203	12.1	23.22	NaN	6.25	4.22	9.29	13.74	17.74	14.49	8.67	NaN	NaN
27921	38.12	53.15	153	9.83	20.38	NaN	3.72	3.61	8.52	12.57	15.01	11.54	8	NaN	NaN
27928	38.52	52.63	168	14.54	26.86	NaN	5.2	5.45	12.42	15.72	20.9	17.89	8.4	NaN	NaN
27930	39.52	52.7	150	14.06	28.1	NaN	4.11	5.8	11.99	15.56	21.98	17.44	7.75	NaN	NaN
27935	40.48	52.88	158	21.66	52.97	NaN	3.39	5.93	14.9	26.46	35.47	32	11.35	NaN	NaN
27947	41.33	52.8	128	8.05	42	0	0.24	4.53	11.78	20.94	28.78	24.51	1.36	0	0
27957	42.72	52.67	130	15.24	30.59	NaN	5	5.95	11.86	16.17	24.23	20.89	10.11	NaN	NaN
27962	45.02	53.12	174	8.03	40.07	0	0.23	2.71	11.62	22.6	29.1	26.55	1.92	0	0
27983	48.4	53.18	104	18.6	37.77	NaN	2.86	6.31	12.64	24.11	30.23	26.79	9.05	NaN	NaN
27995	49.4	53	45	10.75	51.72	0	0.2	2.85	13.01	27.99	39.94	35.9	2.99	0	0
28009	52.22	59.37	168	17.45	64.96	0.03	1.46	10.08	27.57	42.56	53.25	54.33	17.39	0.05	0
28028	56.83	59.55	124	46.85	85	NaN	8.24	18.35	38.87	59.69	76.9	74.6	51.08	19.52	NaN
28033	60	59.75	228	28.92	49.41	NaN	6.15	15.09	26.13	38.78	42.18	42.28	25.54	8.5	NaN
28044	60.53	59.6	132	24.48	42.92	3	5.56	10.29	21	30.45	36.24	33.79	21.2	8.65	NaN
28049	62.33	59.43	131	30.03	57.15	15	5.18	14.03	24.86	39.93	50.9	52.14	29.46	11.2	NaN
28064	65.72	59.62	72	15.35	52.34	0.03	1.95	13	25.82	37.87	44.09	45.47	14.96	0.34	0
28076	69.28	59.6	57	36.31	65.61	27.11	5.88	17.95	32.92	46.62	57.3	58.56	34.91	16.94	NaN
28116	54.65	58.98	187	29.63	53.19	NaN	7.58	14.26	25.09	38.38	46.36	44.73	25.36	6.5	NaN
28128	56.2	58.77	123	25.6	46.78	NaN	6.06	10.95	20.58	32.39	40.96	38.2	23.67	10	NaN
28131	57.57	59.03	316	60.48	110.41	13	11.93	28.91	51.14	75.18	94.2	100.15	66.72	34.13	NaN
28138	58.85	58.52	463	30.04	99.31	0.21	3.84	23.84	47.18	69.07	79.96	87.13	41.46	0.83	0
28144	60.78	58.87	126	13.66	53.25	0.02	1.55	12.28	25.85	36.57	43.35	37.29	6.69	0.19	0
28202	51.57	58.35	178	43.15	86.96	1.5	5.1	13.85	31.97	55.07	72.75	75.77	48.76	14	NaN
28214	52.58	58.13	170	32.36	57.42	8	3.81	11.52	26.27	40.45	51.12	51.21	32.12	20	NaN
28216	54.68	58.08	228	39.47	67.33	4.5	7.23	17.85	34.33	45.96	58.91	58.03	36.09	37.42	NaN
28224	56.3	58	171	19.58	71.61	0.04	1.63	13.81	30.35	49.06	60.7	60.36	17.16	0.12	0
28225	56.4	58	170	41.48	71.61	NaN	7.24	14.63	30.35	49.06	60.7	60.36	32.17	NaN	NaN
28234	57.78	58.12	226	38.6	66	NaN	4.73	16.77	34.18	50.26	56.87	56.6	29.79	10.4	NaN
28238	58.65	57.83	176	36.67	62.89	2.5	6.88	17.15	33.22	47.75	53.44	56.61	35.75	18.87	NaN
28240	60.07	57.88	258	26.37	50.81	1	5	11.74	20.46	32.74	41.95	43.36	26.49	17.92	NaN
28248	61.7	57.87	128	21.15	41.11	NaN	4.75	10.32	18.8	28.05	34	29.72	15.75	9	NaN
28255	63.68	58.05	71	16.45	61.32	0	1.09	11.87	28	42.25	51.73	50.83	10.68	0.13	0
28264	65.35	58.05	59	30.97	50.85	NaN	5.86	12.62	25.8	40.31	47.08	44.31	22.86	15.2	NaN
28275	68.25	58.15	44	9.91	37.38	0	0.68	7.15	16.71	25.79	30.97	29.43	6.31	0.04	0
28302	51.5	57.75	183	33.11	60.74	NaN	4.61	11.15	26.75	42.8	53.55	54.69	31.12	10	NaN
28307	50	57.12	165	33.27	61.85	1	2.92	10.44	23.1	39.06	53.96	57.12	37.9	9.5	NaN
28312	53.82	57.63	187	16.65	56.07	0.01	1.12	8.76	21.13	37.26	49.61	51.89	17.59	0.04	0
28319	54.75	57.08	130	32.62	58.11	NaN	4.26	12.86	27.74	42.86	52.11	51.48	26.99	9.33	NaN
28321	55.38	57.72	164	30.18	53.35	NaN	4.91	12.24	25.87	38.1	47.93	45.79	21.45	15	NaN
28326	56.93	57.42	140	28.15	52.11	NaN	4.19	11.08	22.35	36.62	47.9	45.12	22.26	9.75	NaN
28334	58.22	57.35	244	45.6	77.68	NaN	7.29	18.74	38.7	57.56	69.79	70.64	43.68	21.03	NaN
28346	61.92	57.37	177	22.8	49.82	0	4.56	11.07	20.1	31.2	39.21	32.1	15.18	18.25	NaN
28359	64.67	57.07	91	26.36	45.81	NaN	5.05	10.42	22	34.12	41.69	40.37	20.97	5.5	3
28367	65.43	57.12	104	12.62	45.5	0.01	0.71	8.63	20.42	33.7	40.07	36.29	5.72	0.04	0
28382	57.68	57.72	56	37.97	64	1	6.89	17.37	32.63	47.98	55.97	58.38	36.99	NaN	NaN
28383	72.4	57.52	66	27.51	46.52	9.33	4.62	12.9	25	36.37	43.07	44.66	23.72	4	NaN
28402	51.1	56.9	143	16.8	68.52	0	0.9	6.91	18.49	39.32	54.1	58.2	16.84	0.03	0
28409	52.2	56.43	169	33.24	65.41	1.5	2.8	10.96	26.49	43.56	53.98	55.92	33.09	20.83	NaN
28411	53.45	56.83	159	18.25	67.57	0	0.72	9	26.3	47.28	57.04	60.2	17.06	0.03	0
28418	53.73	56.47	133	14.71	60.33	0	0.59	7.65	19.57	35.21	49.87	50.69	14.12	0.01	0
28419	54.9	56.27	99	13.76	57.9	0	0.27	5.97	17.44	33.73	45.57	48.15	12.97	0.06	0
28428	56.13	56.5	142	35.85	64.33	NaN	4.01	12.25	26.42	44.42	56.8	57.21	25.54	13	NaN
28434	57.78	56.65	207	13.57	53.1	0	1.05	9.78	20.68	36.66	45.23	40.95	5.62	0.04	0
28440	60.63	56.83	283	11.14	49.43	0.01	0.9	8.28	18.49	31.35	38.23	32.16	3.12	0.16	0
28445	61.1	56.7	290	13.83	49.57	0.15	1.93	9.8	19.52	31	38.52	37.59	8.8	0.36	0.02
28449	61.87	56.43	168	23.67	43.14	NaN	6.48	10.05	20.08	31.56	37.82	32.37	10.58	7	NaN
28451	62.72	56.85	126	19.95	35.44	NaN	3.21	9.26	17.73	26.35	31.75	26.05	9.01	NaN	2
28455	63.77	56.72	121	22.36	39.37	NaN	4.14	10.05	19.55	31	35.14	32.69	15.11	NaN	NaN
28456	64.65	56.52	113	32.23	58.54	2	5.68	11.61	23.68	39.54	51.68	51.06	31.43	6	NaN
28465	66.35	56.68	60	18.67	29.72	27.67	4.7	7.81	17.11	22.73	26.89	25.33	16.56	3	NaN
28481	70.62	56.82	70	23.9	42.08	17.33	4.99	11.23	20.37	30.37	35.29	35.19	19.78	NaN	NaN
28491	72.67	56.93	87	32.58	56.79	26.4	6.7	14.81	28.49	41.23	48.84	50.55	27.58	9	NaN
28493	74.38	56.9	74	14.16	51.9	0.03	0.72	8.92	22.07	34.8	42.54	44.52	11.66	0.04	0
28498	73.65	56.45	95	34.09	60.7	0	4	12.64	27.35	43.21	53.47	57.41	30.3	6.17	NaN
28502	51.03	56.23	83	20.69	39.37	NaN	3.42	8.45	15.3	25.26	33.47	34.3	20.93	NaN	NaN
28506	52.1	55.8	192	14.47	58.27	0	0.58	5.4	19.32	37.04	51.53	45.47	6.29	0	0
28517	53.07	55.72	112	22.02	40.04	NaN	4.55	9.58	16.59	26.25	35.01	35.27	25.12	NaN	NaN
28522	56.58	56.08	207	38.65	68.11	NaN	4.88	14.07	28.72	46.8	58.51	64.65	34.83	11	NaN
28533	59.58	56.05	320	31.42	54.58	NaN	3.7	13.53	26.91	43.02	49.31	47.65	25.3	16.5	NaN
28537	57.9	55.7	326	10.79	45.31	0.04	1.27	8.21	17.21	26.55	32.1	32.04	6.65	0.04	0
28541	60.3	56.08	401	31.31	54.15	NaN	4.69	13.9	26.18	40.92	47.41	47.6	25.74	12.88	NaN
28552	63.63	56.08	81	8.76	37.46	0	0.65	5.96	14.61	24.79	31.17	24.83	1.7	0.03	0
28561	65.7	56.02	66	9.95	36.82	0	0.68	7.65	17.79	27.88	31.97	28.93	3.06	0.01	0
28573	69.43	56.1	83	11.33	42.21	0.01	0.68	7.89	18.94	28.62	36.34	36.36	6.9	0.01	0
28586	72.2	55.87	120	19.28	32.62	12.33	3	9.31	17.41	24.82	29.59	29.25	13.9	NaN	NaN
28588	71.37	55.57	129	15.84	30.58	NaN	2.75	8.33	15.29	21.7	26.58	25.08	8.13	2	NaN
28593	74.63	56.1	78	21.58	35.14	8.34	4.35	9.41	19.21	26.41	32.04	31.26	16.22	7	NaN
28598	73.48	55.6	87	26.08	50.25	25.67	3.71	8.68	19.06	32.38	44.19	44.22	20.77	1	NaN
28601	50.62	55.32	113	17.83	29.96	NaN	6.78	8.7	11.79	21.45	28.3	27.5	13.5	NaN	NaN
28611	53.2	55.32	80	16.94	30.69	NaN	3.98	5.41	12.71	22.44	27	24.52	12.01	NaN	NaN
28615	53.8	55.18	126	28.62	55.54	NaN	2.61	8.6	18.28	36.39	48.66	47.27	25.61	NaN	NaN
28621	55.53	55.42	187	29.08	52.14	NaN	3.71	11.28	22.13	37.33	47.65	44.31	25	2	NaN
28624	55.4	55.1	98	10.13	44.76	0	0.44	5.55	14.29	24.62	34.95	35.19	4.77	0	0
28629	56.95	54.9	119	53.54	98.15	2.88	8.67	16.33	39.9	66.86	82.1	82.46	44.43	27.53	NaN
28630	59.67	55.17	583	14.23	55.57	0.06	2.75	11.84	22.74	34.48	41.07	41.68	10.67	0.08	0
28633	59.92	55.37	1102	70.87	113.59	NaN	12.31	31.19	48.84	70.3	94.19	97.21	81.07	43.15	NaN
28637	57.98	55	415	28.97	51.71	1	7.19	14.36	26.75	38.97	44.13	44.04	21.98	4	NaN
28642	61.53	55.3	227	26.46	45.61	NaN	6.4	13.85	24.2	33.64	37.11	31.27	14.19	3	NaN
28645	61.3	55.15	237	23.18	37.29	NaN	7.25	9.24	20.47	28.28	34	29.04	9	NaN	NaN
28655	63.32	55.23	176	28.63	54.35	NaN	2.84	9.53	21.19	35.61	49.08	47.58	27.87	3.64	NaN
28659	64.43	54.92	127	23.88	41.48	2.5	4.14	9.18	20.28	30.45	37.54	36.16	22.61	3.5	NaN
28661	65.4	55.47	79	8.24	34.79	0	0.5	7.18	14.85	22.84	28.02	23.2	1.59	0	0
28666	67.3	55.2	143	6.94	31.73	0	0.52	6.69	14.23	18.75	23.79	19.12	1.61	0	0
28668	66	54.77	152	20.1	32.58	1	5.05	8.43	17.24	24.71	28.81	28.8	14.65	NaN	NaN
28679	69.15	54.83	136	13.15	57.92	0	0.47	5.61	16.22	29.92	37.64	42.75	13.6	2.08	0
28688	71.25	54.9	128	25.19	49	32.33	2.97	9.53	18.66	31.37	41.97	43.92	19.9	NaN	NaN
28696	74.58	55.03	107	29.84	52.7	NaN	5.15	9.88	20.81	33.96	44.81	47.35	33.27	NaN	NaN
28698	73.4	55	122	12.04	47.1	0	1.05	8	18.81	30.42	38.35	39.25	3.93	0.02	0
28704	50.4	54.5	80	7.24	33.25	0	0.13	2.81	8.39	17.52	26.11	24.97	3.29	0	0
28705	51.1	54.42	158	15.13	27.33	NaN	3.15	4.19	8.35	17.64	24.19	23.32	14.97	NaN	NaN
28710	54.92	54.08	120	15.23	26.86	NaN	4.63	6.64	10.99	17.61	21.74	19.2	9.7	NaN	NaN
28711	52.8	54.62	303	24.57	46.6	NaN	6.84	9.4	17.59	28.13	39.05	37.47	26.63	NaN	NaN
28712	53.73	54.58	126	18	33.56	NaN	5.1	7.54	13.98	22.05	28.01	26.2	12.31	2	NaN
28719	54.2	54	355	14.37	53.93	0	0.91	10.15	20.77	34.5	42.01	48.54	14.73	0	0
28722	55.83	54.72	104	11.97	53.21	0	0.51	7.88	17.62	30.75	41.53	42.65	5.29	0	0
28741	60.3	54.55	319	16.75	32.07	NaN	4.52	8.69	15.66	20.93	25.52	22.1	10.52	NaN	NaN
28748	61.62	54.08	193	7.38	33.17	0.01	0.44	6	14.22	20.28	24.23	20	0.77	0	0
28756	64.87	54.47	117	14.29	24.92	3	3.96	6.52	12.45	18.09	22.87	20.64	8.02	NaN	NaN
28766	66.97	54.37	153	24.45	51.26	1	1.4	9.16	16.65	31.33	44.66	47.32	21.37	NaN	NaN
28786	71.75	54.37	124	15.9	25.31	10	4.13	7.54	14.09	19.04	22.36	23.18	11.18	NaN	NaN
28791	72.43	54.63	115	28.6	54.74	29	1.82	8.28	19.84	34.28	44.49	51.51	29.21	NaN	NaN
28797	72.97	54.2	125	17.29	30.07	18.67	2	7.17	14.92	21.13	26.28	26.11	10.45	NaN	NaN
28799	74.8	54.17	115	21.94	51	NaN	2.84	7.82	16.34	25.17	32.98	33.78	22.54	NaN	NaN
28801	50.37	53.97	65	15.8	32.57	NaN	3.07	5.98	9.08	17.66	24.09	21.48	19.13	NaN	NaN
28802	51.3	53.9	112	10.17	46.69	0	0.24	4.38	12.3	25.21	36.5	34.75	4.61	0	0
28806	52.45	53.62	87	21.97	38.96	NaN	4.3	6.64	14.47	26.74	35.87	35.81	16.68	NaN	NaN
28823	57.4	53.9	551	21.42	79.41	0.08	2.36	15.44	36.19	53.07	63.76	63.75	19.39	0.04	0
28825	56	53.6	130	14.91	61.21	0	0.31	7.23	22.23	40.3	50.46	49.2	6.5	0	0
28831	58.33	53.93	565	30.73	55.52	NaN	6.5	12.83	26.21	37.43	47.54	47.46	28.95	10.33	NaN
28833	59.2	53.9	403	7.05	31.59	0.01	0.46	5.74	13.33	17.16	22.33	19.29	2.6	0.03	0
28838	59.08	53.35	382	17	31.64	NaN	7.14	8.94	16.61	21.54	24.12	20.46	8	0	NaN
28867	65.55	53.32	210	15.59	27.89	NaN	2.86	9.25	14.01	19.39	22.67	21.63	11.96	NaN	NaN
28877	68.1	53.32	319	15.59	28.72	8	4.52	10.71	15.01	19.39	21.66	20.56	5.72	2	NaN
28879	69.38	53.28	229	10.19	28	1	2.16	4.4	9.6	13.01	13.48	12.07	8.53	NaN	NaN
28895	73.88	53.78	127	7.02	28.59	0	0.3	5.37	12.78	18.96	23.45	22.64	1.99	0.03	0
28900	50.22	53.25	40	14.26	65.31	0	0.39	6.32	18.25	36.92	53.11	49.72	6.26	0	0
28903	52.05	53	81	37.93	62.1	NaN	10.5	12.13	23.8	42.04	55.78	53.87	32.69	NaN	NaN
28908	51.28	52.62	88	12.7	22.59	NaN	7.25	3.89	9.48	14.28	18.88	17.61	8.67	NaN	NaN
28916	54.75	52.93	190	26.83	44.46	NaN	3.95	7.93	19.25	34.65	42.34	40.34	22.68	NaN	NaN
28925	55.92	52.92	180	22.78	40.48	NaN	8.9	9.47	17.38	28.37	33.37	34.86	14.34	NaN	NaN
28941	60.67	53.05	300	13.7	25.88	NaN	4.64	7.26	12.27	15.84	18.7	16.91	10.53	NaN	NaN
28952	63.61	53.21	156	7.24	29.33	0	0.42	4.84	11.84	21.14	24.62	22.72	1.11	0	0
28957	62.6	52.68	208	12.42	23.32	NaN	3.84	6.29	11.13	17.18	19.53	17.59	5.78	NaN	NaN
28966	66.97	52.82	227	28.49	75.68	3.33	2	5.75	18.2	40.84	56.93	59.27	5.43	NaN	NaN
28967	65.5	52.67	209	12.69	23.5	1.33	2.2	4.57	10.53	17.13	22.15	20.52	8.27	NaN	NaN
28978	68.75	52.53	399	34.83	69	5.5	4.17	12.79	29.59	46.25	59.05	61.4	38.48	2	NaN
28984	70.22	52.95	384	23.7	56.47	2.5	2.87	8.46	17.16	31.16	48.15	45.26	12.48	2.2	NaN
29023	81.95	59.85	76	21.1	65.03	0.03	3.56	18.01	36.33	47.92	55.15	58.52	33.87	1	0
29068	91.02	59.5	67	53.4	83.37	6	8.64	29.56	48.04	67.7	78.25	80.54	61.73	33.96	NaN
29103	76.73	59.07	69	47.17	73.2	6.33	12.6	27.79	41.19	59.4	66.05	67.29	44.76	22.88	NaN
29111	78.2	59.2	69	18.97	62.21	0.01	2.62	16.56	31.46	44.33	51.7	55.05	24.49	0.51	0
29128	81.5	58.7	63	33.84	66.78	10	6.83	17.06	28.18	42.13	49.17	50.09	36.48	15.5	NaN
29154	87.75	58.88	113	23.26	71.2	0.02	3.47	19.9	39.38	54.58	62.19	61.72	35.53	1.29	0
29209	77.22	57.8	99	39.38	63.81	2.5	8.75	20.31	35.9	49.88	57.99	57.11	36.31	13.3	NaN
29231	82.95	58.3	75	17.48	60.29	0.01	2.13	12.14	26.55	41.48	50.03	53.29	20.44	0.35	0
29253	89.47	58.45	133	41.38	62.75	NaN	8.18	20.35	36	51.1	56.4	59.49	48.46	23.14	NaN
29263	92.1	58.45	79	18.66	61.4	0	2.53	17.21	34.98	46.82	55.29	53.56	15.86	0.04	0
29274	93	58.08	90	39.79	65.93	1	2.7	23.17	38.2	53.96	59.44	60.67	41.2	17.57	NaN
29282	97.45	58.38	133	8.69	33.33	0	0.85	8.02	16.26	22.74	27.83	23.11	3.71	0.03	0
29313	79.43	57.57	97	17.91	59.14	0	2.32	13.6	28.99	43.86	51.86	51.53	20.22	0.14	0
29328	82.07	57	110	20.83	70.96	0	2.2	13.14	31.23	50.35	59.73	63.97	25.13	0.16	0
29332	83.78	57.58	114	28.02	48	6	4.55	14.25	27.57	39.08	42.99	40.72	20.53	3	NaN
29348	86.22	57.07	114	17.53	61.76	0	1.72	12.25	28.85	46.41	54.38	52.9	11.56	0.06	0
29363	92.27	57.63	179	48.37	74.79	NaN	8.56	27.4	45.31	62.75	69.49	71.67	50.28	12.5	NaN
29393	99.53	57.65	220	14.13	46.18	0.02	2.37	14.05	26.33	33.03	37.65	39.06	15.67	0.31	0.13
29405	76.57	56.6	116	28.3	46.37	4	5.1	11.94	25.37	36.31	42.52	42.14	23.63	NaN	NaN
29418	78.35	56.35	126	20.07	75.43	0	1.01	10.65	29.3	47.21	60.14	66.32	24.44	0.05	0
29430	84.92	56.5	139	23.24	77.75	0	2.68	17.25	37.94	56.43	65.61	67.45	24.8	0.1	0
29456	89.32	56.53	205	17.05	28.86	NaN	5.58	11.47	19.41	22.13	24.27	19.95	10.29	2	NaN
29464	90.55	56.65	231	19.17	32.77	NaN	5.8	12.6	20.71	25.4	29.03	26.34	13.11	2.5	NaN
29467	90.5	56.28	265	5.43	24.69	0.03	1.6	6.27	12.15	15.04	16.38	11.92	1.2	0.11	0
29471	93.13	56.9	180	36.64	54.68	NaN	7.89	16.44	29.29	46	49.3	50.38	34.38	NaN	NaN
29477	93.28	56.5	164	14.4	27.46	NaN	4.5	8.57	15.83	19.06	19.96	16.74	7.5	NaN	NaN
29481	95.22	56.85	188	18.31	31.07	18	4.37	9.56	17.51	22.83	26.95	25.42	17.6	4	NaN
29498	98.37	56.35	221	29.97	49.86	2	5.34	14.96	29.73	40.38	45.44	45.04	28.96	NaN	NaN
29524	80.03	55.85	129	28.02	47.52	4	3.92	11.9	25.33	35.63	40.87	43.51	28.85	NaN	NaN
29532	84	56.25	113	29.18	47.15	NaN	8.31	13.79	26.31	36.1	40.71	39.9	21.5	14.5	NaN
29534	82.7	55.98	127	28.38	43.79	NaN	5.33	15.01	24.71	33.1	38.9	39.44	24.95	11.25	NaN
29539	84.4	55.67	193	11.45	42.97	0.02	1.8	12.43	22.68	30.23	33.28	32.8	4.01	0.06	0
29541	85.62	56.07	251	23.52	86.69	0.01	3.37	16.24	33.57	51.05	65.12	74.33	37.77	0.12	0
29551	87.68	56.18	144	19.48	32.85	NaN	5.5	11.6	20.89	25.67	28.18	24.37	9.4	NaN	NaN
29552	88.52	56.12	222	20.9	37	NaN	5.43	11.91	21.54	27.95	28.7	28.5	15.39	4	NaN
29553	89.55	56.22	290	20.37	36.31	2	4.92	13.4	21.53	29.63	31.86	27.77	9.33	1	NaN
29557	88.32	55.75	211	8.17	42.55	0.01	1.57	5.89	11.48	17.79	24.98	30.57	6.33	0.3	0
29562	91.67	56.1	332	40.24	68.16	NaN	6.36	18.77	32.89	53.55	55.47	58.83	42.28	9.91	NaN
29563	92.2	56.12	479	60.6	91.68	NaN	14.06	28.56	53.23	71.02	78.44	83.08	69.35	29.95	NaN
29570	92.75	56.03	276	19.51	47.62	2	5.72	10.92	16.51	23.84	28.76	27.99	20.71	5.75	NaN
29574	92.7	56	277	11.44	26.65	NaN	9.41	8.63	11.89	12.96	14.9	12.61	9.43	NaN	NaN
29576	94.3	55.82	375	19.36	36.32	2.6	4.53	10.82	20.19	30.47	31.57	30.51	13.78	7	NaN
29580	95.3	56.2	359	9.98	36	0.03	1.6	10.21	18.37	24.43	28.46	28.64	7.6	0.16	0
29581	95.63	56.2	207	12.65	29.1	1	3.58	5.9	12.43	14.56	16.77	12.56	16.25	18	NaN
29587	95.47	55.63	252	15.9	28.14	2	4.68	9.2	14.4	19.98	24.71	20.92	10.49	2	NaN
29594	98	55.95	307	7.51	32.97	0.03	1.38	7.14	14.71	20.63	23.81	19.57	2.12	0.07	0
29602	76.75	55.3	111	17.37	28.7	2	4	6.93	15.2	21.09	25.77	25.09	11.58	NaN	NaN
29605	75.97	55.2	112	8.95	34	0	0.62	6.41	16.3	24.4	29.9	24.95	1.28	0.02	0
29612	78.37	55.33	120	11.69	42.48	0.01	0.96	9.67	21.17	29.14	34.33	35.41	5.09	0.04	0
29613	79.62	55.3	140	22.5	37.21	5	4.58	12.52	22.57	27.2	32.92	32.68	17.86	13	NaN
29625	80.97	55.1	140	15.6	27.54	NaN	3.59	8.1	15.91	19.64	23.54	22.54	11.88	10	NaN
29626	82.23	55.02	159	16.66	27.5	NaN	3.68	8.69	15.63	21.52	24.22	23.94	8.18	11	NaN
29631	82.75	55.3	137	17.62	31.36	NaN	3.76	8.54	16.78	22.9	26.78	26.5	11.18	NaN	NaN
29632	83.6	55.3	215	29.99	49.93	2	6.74	15.2	28.16	38.04	44.4	42.44	22.83	7	NaN
29636	84.4	55.23	173	22.01	38.74	NaN	4.22	10.06	19.77	29.06	34.12	32.79	13.17	12	NaN
29638	82.95	54.9	133	12.09	46.04	0	1.04	7.3	18.62	29.23	35.88	37.35	5.98	0.06	0
29642	86.12	55.23	260	30.53	51.84	NaN	7	13.22	27.85	39.11	46.63	46.28	23.3	NaN	NaN
29645	86.22	55.25	148	17.5	65.21	0.02	0.91	9.55	28.57	45.04	55.24	56.83	13.86	0.05	0
29649	86.8	55	151	41.2	70.19	NaN	7.95	16.34	39.12	52.35	60.53	61.86	28.4	NaN	NaN
29653	89.82	55.3	387	9.24	17.54	NaN	4.29	6.57	10.6	13.59	15.14	10.49	4.77	9	NaN
29654	87.65	55.22	495	109.26	187.14	8	16.5	57	102.15	144.15	154.72	164.41	135.35	52.42	NaN
29662	91.62	55.38	321	16.87	48.33	NaN	6.43	7.27	14.76	17.64	18.87	20.38	25.83	50.54	38
29664	90.8	55.1	326	2.87	16.39	0.01	0.56	2.79	5.72	7.65	9.63	6.4	0.69	0.06	0
29675	93.37	55.08	477	30.91	51.59	5	7.79	16.18	29.86	40.27	43.77	46.4	33.84	9.97	NaN
29676	94.88	55.25	337	10.36	21.04	3.67	4.14	5.69	11.43	14.42	17.76	12.7	4.17	3	NaN
29698	99.03	54.88	411	5.05	21.75	0.01	0.74	5.37	10.57	14.86	17.94	9.7	0.64	0.07	0
29706	77.28	54.37	115	14.33	23.54	3	5	6.88	13.92	18.25	20.67	18.67	7.3	NaN	NaN
29712	78.67	54.7	113	17.79	29.52	NaN	1.63	7.8	15.38	22.19	26.51	25.1	11.66	3	NaN
29724	80.47	54.33	160	19.24	33.52	NaN	3.89	9.61	17.77	24.3	29.25	28.78	11.78	NaN	NaN
29726	81.88	54.37	132	30.21	48.36	NaN	4.4	8.25	21.42	37.13	43.14	44.62	28.18	NaN	NaN
29735	83.38	54.3	293	23.5	40.07	NaN	6.23	13.33	22.3	30.32	35.14	35.32	20.01	2.5	NaN
29736	84.22	54.33	198	36.23	62.81	NaN	6.17	13.28	28.51	45.59	53.64	54.97	30.94	4	NaN
29752	88.82	54.75	1183	31.71	109.33	1.41	17.42	35.65	39.73	54.3	62.51	75.13	74.35	29.69	0.15
29756	89.93	54.5	475	4.37	11.14	5	4.1	3.68	4.27	4.62	4.69	3.08	3	0.87	NaN
29759	89.28	54.33	847	58.71	88.46	NaN	8.53	29.33	55.42	69.39	78.49	83.96	71.75	36.46	NaN
29766	92.13	54.37	282	13.73	24.68	2	2.96	5.62	13.09	19.54	21.93	20.38	9.38	NaN	NaN
29789	96.97	54.22	984	6.54	22.96	0.36	2.23	7.62	12.15	14.37	16.32	15.74	4.79	0.56	0.04
29802	76.53	53.82	114	11.28	22.56	3	4.38	6.92	10.46	12.38	14.24	12.88	13.2	12.3	NaN
29807	75.45	53.35	94	5.86	23.57	0	0.21	4.13	10.31	16.26	19.87	18.36	0.79	0	0
29813	79.23	53.97	144	18.92	30.64	NaN	4.35	8.88	17.3	24.3	28.13	26.62	11.73	NaN	NaN
29814	78.02	53.73	115	13.73	25.48	NaN	3.5	5.92	12.09	18.85	22.36	20.42	7.93	NaN	NaN
29816	79.55	53.62	138	17.64	30.46	NaN	4.05	7.09	15.45	21.49	26.03	27.33	14.69	NaN	NaN
29822	81.28	53.8	129	7.37	32.68	0	0.38	4.84	12.76	18.97	23.96	24.52	1.6	0	0
29827	80.77	53.27	122	11.91	21.89	NaN	3.29	4.65	10.01	14.77	17.36	14.79	9.02	NaN	NaN
29832	83.58	53.82	144	28.57	52.22	NaN	3.82	10.06	25.82	37.68	46.16	46.07	20.84	1	NaN
29838	83.5	53.4	184	13.18	54.79	0	0.88	6.96	17.99	34.33	43.49	47.16	5.91	0.02	0
29848	85.92	53.47	272	26.74	49.67	NaN	4.19	9.55	22.82	35.22	41.85	43.04	21.68	5.33	NaN
29849	87.2	53.3	293	22.04	86.24	0.01	1.65	12.53	33.09	52.65	66.43	70.28	19.94	0.05	0
29858	89.07	53.28	527	29.53	96.14	0.03	3.49	24.5	51.02	69.81	80.54	83.85	43.23	0.35	0
29862	91.32	53.77	256	2.15	14.21	0	0.2	2.45	4.97	7.19	7.92	2.24	0.11	0.01	0
29864	90.37	53.72	525	3.56	6.9	1	5.5	3.53	3.19	4.08	3.64	2.09	1.35	NaN	NaN
29866	91.7	53.7	254	3.21	17.48	0	0.3	4.9	7.14	10.54	11.09	5.39	0.13	0	0
29869	92.42	53.3	298	18.44	43.34	4	5.02	8.37	16.09	25.55	29.28	27.08	14.87	4	NaN
29892	98.82	53.95	705	16.82	28.48	2	4.86	9.42	15.72	21.57	23.09	22.9	13.01	8.75	NaN
29894	98.22	53.63	918	7.86	16.11	1.13	4.11	6.47	8.81	10.25	9.57	8.96	6.1	3.66	NaN
29915	78.65	52.97	126	5.46	23.07	0	0.42	4.31	9.86	14.92	18.32	16.44	0.68	0.01	0
29923	82.3	53.07	219	16.25	67.17	0	0.61	6.77	21.29	42.99	55.64	57.76	9.68	0.01	0
29937	82.77	52.52	175	12.11	21.64	NaN	3	7.1	11.68	14.26	16.9	13.26	8.54	NaN	NaN
29939	84.95	52.68	225	10.88	48.69	0	0.72	7.39	18	30.79	36.89	35.3	2.81	0.02	0
29946	87.28	52.87	354	72.97	119.04	NaN	20.75	32.61	61.75	86.96	100.05	106.55	67.4	8.5	NaN
29956	89.92	52.8	455	10.13	17.66	19	3.62	4.61	10.02	14.01	14.82	12.01	3.1	1	NaN
29962	90.92	53.05	469	6.07	13.32	5	4.61	4.9	6.23	8	7.91	6.41	3.72	4	NaN
29974	93.23	52.8	1404	41.71	134.66	1.28	19.36	44.06	52.59	57.49	65.8	83.09	98.62	45.25	0.36
29999	99.82	52.5	1570	5.51	10.74	2.5	6.02	4.54	4.86	5.71	5.87	5.65	3.92	7.75	NaN
30028	106.17	59.28	352	12.61	39.17	0.04	3.22	12.43	21.05	27.48	31.23	32.92	21.01	0.72	0
30054	112.58	59.45	190	25.61	74.14	0.02	4.81	23.86	44.42	58.19	65.52	66.98	40.6	0.56	0
30069	116.92	59	330	5.48	18.68	0.02	1.38	5.85	10.09	13.67	16.08	14.68	2.25	0.12	0.03
30089	121.77	59.02	175	17.77	56.32	0.03	3.48	15.26	28.07	37.62	45.3	46.85	32.65	0.8	0.13
30102	101.08	58.97	185	22.7	41.43	7.5	5.1	14.51	23.03	29.54	33.24	32.44	24.27	20.33	NaN
30117	102.75	58.2	401	32.94	56.39	22.17	4.58	19.53	32.98	43.75	50.98	50.89	32.98	12	NaN
30138	108.68	58.1	245	29.58	45.59	3	8.9	18.42	30.73	37.5	41.65	41.76	31.09	13	NaN
30142	111.25	58.88	227	45.63	75.68	2.33	7.35	28.69	48.42	62.02	68.9	71.88	57.19	18.6	NaN
30151	112.9	58.85	203	53.88	88.08	2	15.38	40.69	57.9	65.54	74.56	75.33	65.74	29.65	NaN
30157	112.87	58.32	224	55.55	91.75	2	8.63	38.25	61.1	74.95	83.24	86.97	68.85	17.44	NaN
30209	102.3	57.12	371	26.28	110.82	14.14	5.05	13.53	26.53	35.92	42.82	44.02	21.8	17.39	35
30219	104.97	57.1	354	22.18	63.18	0.05	3.44	20.57	36.57	46.94	53.49	56.88	36.86	2.01	0
30229	107.07	57.33	271	28.38	46.11	NaN	4.4	15.13	26.77	34.5	41.79	42.38	26.45	6	NaN
30230	108.07	57.77	259	14.3	44.93	0	2.05	13.45	27.51	34.6	39.08	38.71	16.81	0.06	0
30252	114.02	57.82	249	14.56	48.29	0.09	1.96	13.69	27.51	37.54	43.61	38.8	4.93	0.05	0
30253	114.23	57.85	275	17.42	56.74	0	2.82	16.88	34.01	44.81	50.69	50.36	12.27	0.01	0
30309	101.75	56.28	416	12.84	46.21	0	1.08	10.58	22.33	31.74	36.76	37.89	9.73	0.07	0.01
30320	105.7	56.87	669	54.22	94.3	2.25	7.01	36.46	53.27	68.85	78.6	84.69	77.41	31.38	NaN
30328	105.83	56.05	338	16.13	51	0	2.07	14.05	28.99	37.29	43.01	44.36	19.74	0.05	0
30337	107.62	56.32	362	17.65	53.5	0.01	2.07	14.4	30.21	39.54	45.57	46.78	23.2	0.29	0.39
30356	114.83	56.38	513	4.12	16.07	0.04	0.94	4.91	8.7	11.33	11.7	8.15	2.07	0.15	0
30364	115.67	56.5	474	12.95	25.7	3	3.1	8.23	12.97	16.67	19.69	18.13	9.75	4.73	NaN
30372	118.27	56.9	711	4.42	17.64	0.39	2.9	6.3	8.53	10.79	12.17	10.45	2.33	0.37	0
30385	121.48	56.58	426	7.62	23.66	0.06	2.21	8.28	13.23	16.59	19.06	20.09	6.33	0.18	0
30393	124.87	56.83	858	20.49	52.17	1.04	11.62	24.33	32.68	39.06	44.5	44.87	32.2	3.07	0.02
30405	101.03	55.38	423	20.64	37.52	10	5.39	10.04	20.41	25.11	29.12	29.12	18.21	44.12	NaN
30424	105.48	55.48	372	27.47	43.11	1	7.53	16.38	27.85	34.6	40.13	39.51	25.7	8.86	NaN
30433	109.55	55.78	487	9.92	39.63	0.01	1.7	8.13	16.65	24.15	28.98	30.42	10.25	0.16	0
30437	107.62	55.15	495	14.5	43.52	0.02	1.53	11.73	24.24	32.2	38.03	40.16	19.94	0.18	0
30439	109.75	55.12	465	30.74	57.23	3	5.07	14.7	30.96	37.87	44.48	43.74	31.02	19.15	NaN
30455	113.62	55.47	1097	9.79	18.11	2.72	3.19	7.01	10.71	12.19	13.51	14.31	11.54	3.45	4
30457	113.13	55.27	1078	9.88	20.14	2.75	3.61	5.66	9.99	11.94	12.91	13.11	11.96	5.83	NaN
30469	116.77	55.12	613	5.58	19.69	0.01	1.71	6.66	10.38	13.69	14.76	13.77	4.59	0.05	0
30471	117.37	55.87	750	4.55	16.38	0.02	1.77	6.15	9.26	11.52	11.65	10.67	3.55	0.13	0
30484	120.55	55.43	526	12.94	40.36	0.41	5.01	15.69	22.21	26.32	29.19	31.7	20.66	0.4	0
30493	124.88	55.97	861	7.44	30.75	0.69	6.68	11.55	12.14	12.99	14.57	15.69	13.01	1.34	0.03
30499	124.67	55.18	528	21.17	32.29	3	9.81	17.08	22.35	26.78	27.85	26.36	14.38	14.25	NaN
30504	100.63	54.6	522	8.57	32.21	0.04	1.12	6.83	15.78	21.63	25.32	23.89	4.65	0.11	0
30507	100.08	54.18	527	16.87	29.32	1	2.75	9.15	17.9	23.23	24.79	24.34	11.12	5.67	NaN
30514	103.02	54.17	427	13.66	23.04	NaN	1.55	5.47	13.88	18.63	21.77	19.67	5.67	NaN	NaN
30521	105.17	54.8	418	10.95	38.11	0	0.6	9.4	21.27	29.6	33.93	31.69	5.12	0.02	0
30536	109.53	54.33	468	19.77	60.24	0.02	2.47	16.22	38.28	45.91	48.21	50.45	36.56	1.53	0
30537	108.27	54.03	464	8.8	13.46	NaN	5.5	6.67	6.37	9.35	10.63	10.9	5.6	NaN	NaN
30542	111.15	54.85	563	9.2	16.48	0.5	2.67	5.73	10.07	12.45	11.95	10.36	9.22	3.67	NaN
30549	111.95	54.2	1302	11.08	27.04	12.18	6.2	7.89	10.53	13.03	13.46	13.03	11.29	10.37	11.75
30554	113.58	54.47	903	3.05	18.11	0.02	1.13	4	6.28	7.84	8.17	5.94	1.39	0.19	0
30555	113.1	54.6	1314	5.02	21.72	0.26	2.04	5.93	7.66	9.51	10	10.23	7.54	1.87	0.02
30565	116.5	54.4	686	5.93	19.7	0.06	1.71	7.47	11.78	14.24	15.58	14.79	3.17	0.19	0
30576	119.9	54.43	644	23.17	42.14	4.78	7.21	19.84	27.11	31.64	33.64	35.66	30.13	5.81	14.5
30597	122.9	54.03	454	18.78	31.22	4	8.8	12.58	19.98	22.8	25.72	25.91	14.87	5.67	NaN
30603	102.05	53.93	458	16	28.61	NaN	2.19	8.95	16.74	22.58	25.67	22.6	4.37	2.5	NaN
30606	102.53	53.6	450	15.64	26.83	NaN	2.88	8.58	17.41	21.82	24.46	20.81	4.47	4	NaN
30612	103.07	54	427	5.92	23.14	0	0.47	4.64	11.73	15.95	19.1	15.72	0.73	0.02	0
30618	103.77	53.13	446	15.33	25.93	NaN	1.79	7.94	15.71	21.66	22.9	20.42	8.96	NaN	NaN
30627	105.53	53.1	762	6.43	24.7	0.09	0.91	5.09	11.53	15.68	18.85	17.2	2.4	0.11	0.01
30632	108.58	53.85	458	10.17	39.93	0	0.93	6.48	20.04	24.97	26.32	25.38	10.62	0.17	0
30635	109.02	53.42	461	8.4	31.9	0	1.38	9.05	19.15	23.57	23.09	20.22	3.81	0.05	0
30636	109.6	53.6	489	13.84	49.45	0	1.24	13.42	30.78	38.63	37.68	34.73	7.13	0.01	0
30650	112.8	53.2	923	4.58	18.79	0.04	0.64	4.68	8.47	11.07	12.71	11.93	2.59	0.29	0
30664	115.62	53.53	811	10.94	17.83	5.25	5.52	8.36	11.42	14.47	15.63	16.31	8.33	7.14	NaN
30669	117.48	53.07	708	8.98	16.38	1.1	3.91	7.08	10.36	12.93	14.07	11.73	5.99	3.41	7
30673	119.73	53.75	625	4.81	17.89	0.02	1.42	6.1	10.32	13.63	14.42	8.64	1.25	0.12	0.01
30675	118.72	53.55	582	11.8	23.46	4.69	4.82	8.82	13.15	16.3	17.68	17.51	8.6	4.67	4.63
30679	119.22	53.1	384	11.67	21.77	1.67	3.84	7.5	13.89	16.39	17.32	17.41	8.14	2.5	NaN
30682	120.87	53.87	472	12.96	20.52	NaN	6.54	7.5	13.97	16.82	17.66	17.17	11.26	NaN	NaN
30683	121.93	53.97	522	13.06	20.93	5.2	6.31	9.09	14.3	18.98	19.41	14.62	6.24	NaN	NaN
30688	121.55	53.35	314	18.05	27.92	5.5	7.59	12.94	19.41	22.11	23.93	22.82	12.94	7	NaN
30692	123.97	54	398	5.12	18.69	0	1.3	7.85	11.97	15.26	15.17	12.77	1.58	0.05	0
30695	123.9	53.5	266	5.37	20.03	0	0.96	7.41	12.33	15.52	16.28	10.53	1.03	0.01	0
30703	101.98	52.97	543	14.16	46.72	0.02	1.98	12.4	25.79	34.45	39.67	39.76	11.35	0.13	0
30710	104.35	52.27	469	8.06	31.07	0.01	1.54	7.92	17.95	24.52	28.51	15.65	0.71	0.07	0
30713	104.77	52.82	526	12.03	20.36	NaN	1.15	5.85	12.04	15.64	17.6	16.26	4.87	3	NaN
30716	104.37	52.47	453	3.94	23.97	0	0.37	3.27	7.9	11.25	14.02	8.76	0.15	0.03	0
30726	107.13	52.57	461	18.84	31.04	NaN	5.5	8.81	14.8	22.3	27.48	26.92	14.88	8.17	NaN
30727	105.42	52.03	461	2.21	12.18	0.01	0.31	2.08	5.55	7.74	8.05	3.63	0.25	0.01	0
30729	106.65	52.05	467	7.93	15.46	1	2.81	6.51	10.83	12.25	12.27	7.65	2.17	2.89	NaN
30739	109.78	52.17	666	3.11	6.61	2.5	2.27	2.04	3.31	4	3.75	2.4	2.28	3.13	NaN
30741	109.96	52.76	1286	28.55	51.55	6.99	4.71	26.26	34.88	41.54	43.88	46.88	36.27	10.91	6.4
30745	111.55	52.53	952	2.22	11.1	0.01	0.34	2.81	4.7	6.38	6.58	3.48	0.92	0.2	0.01
30758	113.48	52.08	671	1.57	9.08	0.01	0.23	2.28	3.9	5.11	4.92	1.25	0.31	0.06	0
30764	115.17	52.65	646	5.82	11.43	3	2.29	4.02	6.15	8.14	9.7	7.74	2.77	3.62	NaN
30765	116.2	52.55	533	4.89	9.54	0.5	1.9	3.11	5.6	7.38	7.33	5.48	2.04	3.25	NaN
30766	117	52.53	539	6.52	11.45	3	1.82	4.29	7.02	9.32	10.02	7.96	2.69	3.5	NaN
30768	116.53	52	482	7.17	13.21	1.5	3.07	4.41	7.53	10.42	11.2	7.6	2.38	4.71	4.5
30772	118.8	52.7	407	11.92	22.43	2.33	2.64	7.58	15.59	17.73	19.36	19.36	6.03	1.78	2
30777	117.7	52.23	525	4.62	17.32	0	0.49	5.88	11.43	14.04	15.19	10.04	0.53	0.04	0
30781	120.03	52.75	370	13.05	22.13	7	4.71	9.32	12.69	16.1	17.69	18.31	8.58	5.64	NaN
30802	100.98	51.68	1304	2.52	7.2	2.5	2.75	1.84	1.29	2.67	4.61	5.69	3.99	1.9	NaN
30811	102.53	51.73	721	2.52	12.41	0.01	0.37	2.67	5.78	7.57	9.45	4	0.23	0.04	0
30815	103.6	51.53	1442	50.01	142.69	4.72	18.86	47.95	66.93	81.02	92.6	106.7	112.41	51.08	0.64
30822	105.85	51.72	465	1.9	13.59	0	0.23	2.73	4.26	6.25	6.41	3.65	0.66	0.06	0
30823	107.6	51.83	515	3.26	13.77	0	0.18	3.04	8.73	10.77	11.12	4.26	0.05	0	0
30824	105.12	51.57	472	41.24	71.04	1	9.95	21.86	37.59	48.84	55.74	62.47	44	8.63	NaN
30825	107.3	51.75	562	2.06	10.45	0	0.12	2.17	5.67	7.09	7.07	1.7	0.07	0	0
30829	106.65	51.1	556	3.2	5.93	NaN	1.29	1.44	2.8	4.57	5.11	3.19	1.67	2.33	NaN
30838	108.87	51.32	806	10.52	18.33	3.44	5.19	5.86	10.65	14.6	16.39	13.23	3.35	8.8	NaN
30843	112	51.73	907	5.92	12.05	6.4	2.78	5.06	7.22	8.02	7.98	5.01	3.27	6.26	NaN
30844	110.47	51.35	802	2.27	12.03	0.01	0.62	3.99	5.81	6.76	6.33	2.69	0.49	0.08	0
30846	112.47	51.35	743	3.29	8.41	3.2	2.56	3.34	3.56	3.68	3.76	2.46	3.27	5.93	NaN
30851	112.63	51.85	1030	12.41	24.79	12.7	4.8	8.27	11.49	15.11	17.64	17.43	10.76	9.73	6
30853	114.32	51.63	616	5.08	11.23	1.67	1.38	3.79	6.42	8.15	8.24	3.77	2.32	2.17	NaN
30856	114.53	51.48	877	14.84	29.26	5.45	5.6	9.45	14.44	18.04	21.39	22.88	14.41	11.15	17
30859	114.52	51.1	681	1.25	8.34	0	0.12	1.5	3.17	3.75	3.47	1.22	0.22	0.03	0
30862	116.03	51.87	597	7.17	12.97	0.5	2.77	4.49	8	10.6	12.21	9.26	2.7	1.63	1
30874	117.57	51.65	715	9.86	19.28	2.76	2.84	6.52	12.11	15.49	17.17	14.84	4.99	4.6	4.5
30879	119.62	51.32	621	5.2	22.14	0.15	0.82	6.24	11.06	14.4	16.25	12.61	0.88	0.02	0
30915	103.6	50.43	984	2.25	12.76	0.02	0.46	2.53	5.34	7.34	8.31	3.04	0.24	0.07	0
30925	106.45	50.37	797	1.98	11	0.01	0.83	2.81	5.32	7.06	6.02	0.95	0.2	0.06	0
30934	107.58	50.6	638	6.21	12.14	1.83	1.21	3.45	6.9	9.78	10.88	6.94	1.46	0.58	NaN
30935	108.75	50.37	771	2.86	14	0.01	0.24	2.39	6.26	10.1	10.45	2.7	0.13	0.02	0
30938	108.9	49.43	940	7.88	15.25	3.33	2.81	5.3	9.05	12.22	14.03	12.6	3.77	3.22	8.5
30947	110.15	50.07	1154	9.66	19.57	3.64	3.41	6.76	11.99	15.31	17.97	15.54	5.14	3.91	NaN
30949	111.97	49.57	908	0.63	8.9	0.01	0.24	1.39	1.62	1.68	1.12	0.47	0.23	0.05	0
30954	112.67	49.7	807	0.59	8.76	0.01	0.27	1.04	1.65	1.85	1.25	0.28	0.16	0.09	0
30957	113.27	50.27	732	2.96	5.86	3.25	2.72	2.67	2.55	2.91	2.61	2.63	3.27	8.5	NaN
30961	115.58	50.95	640	2.83	5.59	3	1.82	1.99	3.33	3.74	3.09	2.16	2.07	1.25	NaN
30965	116.52	50.4	676	1.74	8.57	0	0.43	2.27	4.32	5.66	5.6	1.91	0.3	0.02	0
30971	117.93	50.92	807	7.22	14.55	3.06	2.27	4.16	9.06	11.29	12.33	11.09	3.64	2.5	0.5
30972	118.58	50.88	694	7.31	13.63	2	3.17	4.45	7.29	9.7	10.54	9.56	4.99	4.2	NaN
30975	119.07	50.4	521	5.06	9.9	0.5	1.81	3.39	6.09	7.87	9.13	5	2.46	1.8	NaN
30978	118.38	49.83	550	2.87	5.79	1.67	1.64	2.11	3.12	3.59	3.57	2.01	2.07	4	NaN
31004	125.03	58.62	679	26.01	77.9	1.28	14.74	31.85	41.89	53.63	61.81	67.68	35.6	1.9	0.02
31005	126.3	58.95	283	33.39	54.32	5	10.39	23.58	35.59	44.09	49.45	51.64	37.28	8.58	NaN
31026	130.62	58.73	194	15.72	46.79	0.05	5.89	17.41	27.89	36.03	41.96	43.47	18.38	0.24	0
31054	135.15	59.18	212	36.77	56.19	7.75	12.81	26.12	34.68	46.08	48.95	48.43	39.45	34.74	14
31062	137.67	59.77	381	14.7	43.93	0.11	7.3	20.11	27.52	32.91	34.63	35.14	19.67	0.48	0
31088	143.2	59.37	5	11.8	43.5	0	2.86	12.4	20.19	25.96	28.84	29.95	19.76	1.56	0
31092	148.63	59.77	19	42.36	126.03	0	9.74	47.99	67.09	80.49	91.89	92.54	92.22	32.63	0.06
31102	125.97	57.65	1204	21.57	60.8	1.96	11.95	22.95	29.17	34.94	40.98	44.48	49.69	19.85	0.15
31123	130.9	57.77	255	29.59	44.08	9.33	9.49	20.19	28.56	37.35	41.94	41.65	27.43	15.01	NaN
31137	131.13	56.28	850	23.54	56.28	1.23	14.29	29.28	36.74	43.63	48.2	49.1	46.16	10.84	0
31152	136.15	57.65	318	21.26	53.86	0.59	8.44	22.16	31.87	40.24	47.91	48.7	32.73	0.68	0
31168	138.15	56.45	6	18.86	85.41	0	1.74	12.07	25.62	33.34	39.63	44.27	47.88	15.95	0.07
31174	137.53	54.83	9	21.72	75.41	0	2.36	15.53	34.6	42.33	49.77	51.87	53	11.56	0
31199	126.8	55.03	448	26.39	45.5	NaN	14.14	19.38	25.37	28.92	30.91	33.23	29.62	23.47	NaN
31235	134.5	55.33	318	7.02	28.71	0.09	4.41	11.14	13.04	13.93	14.25	14.18	7.89	1.35	0
31253	128.87	54.72	364	13.44	40.14	0	3.74	18.13	25.74	29.2	30.72	32.5	17.52	0.54	0
31263	130.45	54.73	464	25.47	37.23	NaN	16.59	19.84	23.96	29.73	31.2	32.46	26.73	20	NaN
31285	134.42	54.5	62	17.64	68.37	0	4.81	19.85	28.16	34.43	39.58	41.68	32.84	4.13	0.03
31299	126.35	53.1	314	18.96	29.23	NaN	7.88	11.17	16.71	21.63	22.51	24.47	21.71	31.66	NaN
31300	127.3	53.7	229	8.8	17.44	NaN	6.7	7.36	10.44	11.48	11.59	10.37	8.15	1	NaN
31311	129.07	53.97	405	28.3	38.65	NaN	13.67	21.95	26.65	31	33.97	33.98	26.47	21.27	NaN
31318	130.02	53.07	254	24.24	37.65	NaN	8.35	15.6	24.88	28.42	29.93	33.05	22.44	17	NaN
31329	132.98	53.08	542	15.97	48.21	0.04	4.35	22.2	30.72	36.77	40.2	42.3	15.6	0.46	0
31338	133.97	53.13	682	31.47	46.43	NaN	10.33	23.28	30.56	36.38	38.63	42.05	35.05	22.38	NaN
31348	136.03	53.05	153	40.52	68.85	NaN	17.72	27.79	38.38	47.8	49.36	57.43	50.71	20.41	NaN
31362	140.33	53.95	22	4.27	33.41	0.01	0.45	5.06	6.1	5.12	4.42	7.12	13.74	3.74	0
31369	140.7	53.13	68	25.09	90.1	0	2.1	18.24	37.65	52.07	63.73	71.42	51.58	3.51	0
31371	126	52.78	210	4.71	20.1	0	0.88	6.8	10.57	12.91	13.57	10.1	1.08	0.07	0
31373	128.65	53	332	17.7	28.45	4	5.2	13.4	18.51	21.94	24.21	24.26	16.93	5	NaN
31384	129.07	52.57	246	23.47	35.42	NaN	15.29	14.28	23.3	25.15	28.4	31.36	22.04	14.33	NaN
31388	129.9	52.4	208	9.41	32.79	0	1.25	11.04	18.92	22.57	25.83	26.79	5.73	0.08	0
31392	131.72	52.8	359	36.99	52.79	13	10.53	29.75	36.97	42.23	44.59	47.78	36.11	16.83	NaN
31394	131.13	52.58	300	28.84	43.57	10	6.42	22.5	29.7	35.38	37.97	38.29	21.21	21	NaN
31397	130.87	52.45	267	31.75	45.11	NaN	8.7	26	32.81	35.94	37.95	38.69	27.61	19	NaN
31416	136.5	52.42	73	10.67	38.07	0	1.33	13.31	20.43	24.35	27.49	27.8	12.53	0.21	0
31418	135.8	52.28	201	39.67	64.14	NaN	9.93	25.38	34.26	44.7	49.76	56.45	39.08	15	NaN
31421	137.53	52.7	60	30.9	48.17	NaN	12.11	19.91	27.59	39.17	40.97	43.55	28.83	5.33	NaN
31436	141.3	52.7	5	11.92	56.1	0	0.35	8.25	17.54	23.47	26.98	33.35	31.48	2.9	0
31439	140.47	52.38	35	8.68	42.76	0	0.56	9.64	17.6	21.74	24.51	25.35	9.37	0.13	0
31442	127.65	51.98	281	16.83	31.92	NaN	5.47	11.7	18.64	22.28	22.43	20.59	16.54	16.34	NaN
31443	128.82	51.63	161	6.74	30.79	0	0.86	7.29	13.14	16.09	17.47	16.47	2.07	0.04	0.28
31445	128.12	51.45	197	17.1	24.39	NaN	9.67	10.49	16.59	19.97	22.19	21.97	13.04	NaN	NaN
31459	130.43	51.35	261	11.36	36.62	0	1.78	12.48	21.4	26.49	29.18	29.41	6.99	0.02	0
31469	132.95	51.17	374	25.33	40.07	NaN	6.33	20.35	24.1	31.31	30.42	34.39	21.47	5	NaN
31474	133.27	51.63	384	33.91	46.21	NaN	7	25.48	32.33	37.46	39.85	41.99	30.84	14.5	NaN
31478	133.98	52.27	902	15.38	42.86	0.09	6.37	23.42	29.87	32.4	33.72	34.73	20.49	1.02	0
31482	135.93	51.72	132	36.58	67.17	NaN	8.14	22.25	31.17	40.7	46.95	56.16	38.4	13.56	NaN
31484	135.08	51.42	269	23.2	41.46	NaN	12.21	14.19	21.04	28.35	33.44	29.78	16.49	17.8	NaN
31489	136.8	51.2	92	35.74	54.7	NaN	16.67	16.57	30.78	42.52	49.02	49.26	38.66	11.5	NaN
31510	127.5	50.25	130	2.93	16.03	0	0.37	4.87	8.4	11.53	10.27	2.37	0.26	0.01	0
31521	129.33	50.78	227	16.56	27.34	10	4.52	10.67	16.41	22.53	24.16	24.33	15.62	NaN	NaN
31527	129.47	50.12	241	15.02	22.89	NaN	6.5	9.55	16.29	20.81	19.56	16.65	8.29	NaN	NaN
31532	132.2	50.8	272	9.31	32.67	0	1	11.19	19.12	24.03	27.49	25.38	3.04	0.03	0
31534	131.02	50.43	230	23.27	36.82	NaN	6.25	15.38	24.27	29.96	31.78	31.41	20.96	2	NaN
31538	132.1	50.1	347	9.66	36.62	0.01	1.36	11.61	20	24.93	27.4	25	4.11	0.05	0
31562	138.2	50.9	20	13.38	52	0	1.18	11.25	22.43	32.52	38.49	41.11	13.65	0.01	0
31583	129.92	49.78	116	14.75	24	NaN	2.82	7.59	14.27	20.45	22.09	17.65	2.9	NaN	NaN
31586	128	49.6	117	2.86	15.62	0	0.36	2.94	6.92	9.93	9.63	3.16	0.21	0.02	0
31587	128.65	49.62	115	13.4	20.52	NaN	4.45	7.73	13.54	17.17	18.66	14.59	4.3	NaN	NaN
31594	130.08	49.42	135	6.46	26.03	0	0.64	6.94	13.96	20.32	22.19	15.29	0.46	0	0
31618	132.47	49.02	154	19.48	32.8	NaN	7.63	11.59	19.14	24.76	25.96	24.4	10.36	NaN	NaN
31624	133.23	49.4	198	23.44	39.24	NaN	17.33	13.71	20.73	28.52	29.06	29.64	15.77	NaN	NaN
31632	134.63	49.93	283	25.96	43.48	NaN	17.17	15.83	21.51	29.84	29.35	33.2	25.07	NaN	NaN
31636	134.73	49.55	222	26.42	49.5	NaN	10.4	13.28	25	30.1	32.64	37.59	20.02	1	NaN
31655	136.57	49.45	33	31.55	48.18	NaN	6	15.55	25.15	34	40.81	40.47	25.12	NaN	NaN
31677	138.1	49.2	915	17.5	58.48	0.03	5.31	21.86	28.42	30.19	37.46	44.4	32.13	2.1	0
31702	131.08	49	257	22.59	37.84	NaN	7.64	13.61	24.99	29.51	32.11	26.07	12.97	1	NaN
31703	131.73	49	267	20.73	33	NaN	15.33	11.5	20.26	24.05	26.69	25.72	15.05	NaN	NaN
31707	130.97	47.73	72	2.08	16.15	0	0.13	3.08	5.97	5.99	4.76	3.27	0.09	0	0
31710	132.62	47.95	56	10.24	19.31	NaN	4.22	6.28	11.24	12.75	12.32	10.56	6.42	NaN	NaN
31725	133.83	48.62	52	4.58	23.86	0	0.29	3.87	11.04	15.21	16.97	9.8	0.26	0	0
31733	135.88	48.82	58	7.8	40.1	0	0.47	6.13	14.66	19.66	23.29	23.81	3.46	0	0
31735	135.23	48.52	76	3.92	23.43	0	0.56	4.71	8.69	11.85	12.65	9.06	0.7	0	0
31754	137.05	48.6	403	46.96	72	NaN	12.17	26.66	41.18	52.46	58.86	64.79	42.45	3	NaN
31770	140.3	49	21	13.15	62.93	0	0.15	5.85	19.4	32.14	40.21	42.49	15.04	0.38	0
31786	134.82	47.55	89	20.98	35.71	NaN	7.78	9.52	19.41	25.58	29.33	27.17	14.75	NaN	NaN
31788	134.3	47.1	76	6.56	29.61	0	0.28	3.73	14.97	21.01	24.07	16.81	0.52	0	0
31801	136.18	47.67	180	38.38	56.07	NaN	8	16.64	32.77	43.74	48.22	50.2	30.44	NaN	NaN
31823	139.53	47.97	3	19.78	35.67	NaN	NaN	9.8	15.96	24.27	24.04	25.13	16.23	12.17	NaN
31825	138.4	47.6	165	28.03	52.97	NaN	4.67	11.38	22.68	33.64	37.4	40.38	22.44	5	NaN
31829	138.98	47.32	27	0.72	11.7	0	0	0.35	1.9	2.04	1.3	1.87	0.92	0.01	0
31845	135.3	46.53	130	13.91	53.72	0	0.3	8.05	27.38	37.45	42.78	38.64	4.15	0	0
31873	133.73	45.87	101	6.77	31.14	0	0.15	4.97	15.31	20.96	23.58	15.96	0.62	0	0
31878	133.53	45.08	98	17.88	33.04	NaN	6.91	8.09	17.04	24.83	28.29	18.64	4.25	NaN	NaN
31884	134.27	45.42	139	19.27	34.61	NaN	4.14	9.68	19.07	26.56	28.92	25.2	8.38	2	NaN
31895	135.5	45.45	331	8.35	38.72	0	0.51	6.98	18.05	23.8	23.61	22.82	2.69	0.01	0
31909	136.6	45	68	3.61	34.93	0	0.02	1.64	7.3	11.88	12.43	7.2	0.77	0.01	0
31913	131.98	45.22	88	7.94	15.85	NaN	7.67	4.58	8.16	8.77	8.57	7.83	8.25	NaN	NaN
31915	131.38	44.4	211	1.22	15.4	0	0.04	0.99	4.03	4.65	3.25	1.36	0.07	0	0
31921	132.07	44.72	78	8.06	14.71	NaN	2.5	4.95	7.17	10.65	9.46	7	1	NaN	NaN
31924	132.07	44.43	128	9.77	17.74	NaN	0.75	5.54	8.78	12.81	12.41	10.87	7.5	NaN	NaN
31931	133.1	44.8	99	7.07	34.45	0	0.15	4.77	15.13	22.37	23.88	14.2	0.52	0	0
31935	133.48	44.42	154	17.14	29.41	NaN	3.67	7.64	14.15	22.41	24.15	19.06	6.5	NaN	NaN
31939	133.87	44.15	259	24.66	42.72	NaN	7.75	11.85	20.88	31.33	34.59	30.61	14.3	NaN	NaN
31958	135.45	44.25	65	11.47	24.68	NaN	7.11	9.27	10.82	16.6	14.62	8.77	10.3	3	NaN
31959	135.9	44.4	27	0.75	22	0	0	0.66	2.03	2.18	1.18	2.01	0.26	0	0
31960	131.9	43.8	187	0.95	14.5	0	0.01	1.11	2.44	3.55	2.52	2	0.14	0	0
31961	131.97	43.88	37	3.02	26.75	0	0.18	2.43	7.12	11.23	9.53	2.99	0.19	0.02	0.03
31969	130.8	42.65	41	0.84	20.9	0.01	0.02	0.76	1.82	2.74	1.91	0.89	0.09	0	0
31981	133.07	43.97	188	20.54	32.57	NaN	4.67	8.69	17.96	25.7	27.19	23.01	4	NaN	NaN
31987	133.02	43.15	208	17.79	29.45	NaN	NaN	10.09	12.17	20.95	22.37	17.16	12.88	NaN	NaN
31989	133.9	42.9	44	0.8	16.93	0	0	0.39	1.95	3.32	1.46	1.02	0.21	0	0
31994	134.17	43.58	509	23.58	41.16	NaN	15.4	12.49	17.51	26.98	34.44	33.53	20.03	NaN	NaN
32014	142.5	53.57	5	30.28	78.14	0	0.72	21.72	48.72	55.11	66.75	71.34	68.66	15.46	0
32027	141.63	52.22	6	13.8	53.18	0	0.29	6.39	19.11	26.66	32.28	39.21	37.13	4.96	0
32053	143.13	51.92	34	21.67	78.83	0	0.84	11.74	30.99	45.11	56.6	60.91	47.23	5.04	0
32057	142.67	51.13	66	61.55	106.41	NaN	12.64	28.84	57.46	69.88	82.36	94.28	66.86	30.87	NaN
32061	142.17	50.9	31	12.52	54.82	0	0.43	5.52	15.35	27.43	40.44	41.84	12.71	0.12	0
32071	142.7	50.7	95	28.43	103.62	0	2.18	19.82	46.17	65.4	75.51	80.57	39.37	0.35	0
32076	143.8	50.4	6	27.44	105.62	0	0.21	8.59	31.19	51.41	66.1	77.15	68.19	17.22	0
32077	142.58	50.23	181	42.4	63.96	NaN	13.71	21.22	37.38	49	55.89	60.64	47.83	16.46	NaN
32088	142.03	49.07	43	3.19	25.52	0	0.14	3.1	6.98	9.1	8.56	6.52	0.64	0.04	0
32098	143.1	49.2	7	13.54	65.18	0	0.25	4.02	16.87	33.23	46.19	45.38	14.53	0.42	0
32099	144.73	48.65	33	3.1	17.93	0	0	1.09	6.07	8.76	8.6	8.29	3.06	0.33	0
32121	142.2	48	18	3.91	27.18	0	0.01	2.58	8.95	12.41	13.23	8.02	0.82	0.08	0
32133	142.8	47.33	11	54.57	88.5	NaN	1	9.23	34.27	60.24	72.38	75.06	74.27	NaN	NaN
32145	141.87	46.67	22	9.41	51.97	0	0.01	3.52	15.57	27.58	33.43	28.68	3.97	0.05	0
32149	142.08	45.9	34	4.39	33.28	0	0.02	1.2	6.68	11.24	13.84	13.75	2.27	0.04	0
32150	142.72	46.95	24	14.44	63.18	0	0.02	4.9	20.08	38.25	47.43	39.01	4.45	0.14	0
32165	145.87	44.02	44	4.24	32.17	0	0	0.89	4.56	11.21	15.45	13.25	2.15	0.03	0
32174	147.88	45.25	25	6.88	43.86	0	0	1.56	8.14	17.14	23.2	26.67	8.15	0.02	0
32213	156.68	50.87	48	30.92	105	0	0.01	6.14	33.34	55.05	72.18	84	83.16	28.08	0
32246	163.17	59.3	3	44.69	140.93	0	0.47	13.5	42.87	73.63	101.57	119.77	125.1	54.55	0.14
32252	159.17	58.5	4	19.34	60.62	0	1.14	18.62	34.04	41.23	47.42	49.75	41.94	10.15	0
32287	156.7	57.08	3	23.01	73.55	0	1.45	23.53	46.96	54.86	55.54	56.25	38.55	2.46	0
32363	158.7	55.9	481	18.81	61.03	0.03	1.74	17.33	31.38	41.77	47.33	52.39	37.52	1.41	0.01
32389	160.83	56.32	29	31.62	115.96	0	0.86	15.39	40.29	67.56	93.12	101.39	78.69	7.58	0
32411	155.58	55.58	6	21.43	73.07	0	0.57	20.42	39.59	50.59	52.81	53.81	36.22	1.41	0
32447	159.07	55.12	101	20.36	67.68	0	1.11	15.71	32.66	47.31	56.84	57.78	34.94	0.66	0
32477	155.93	54.3	25	28.12	86.93	0	0.98	22.74	48.88	62.06	68.34	72.94	58.08	8.27	0
32509	159.98	54.1	28	9.08	52.04	0	0.01	2.07	12.38	21.56	26.01	30.76	20.9	1.26	0
32539	157.7	53.1	325	66.22	200.17	0.02	3.36	34.63	86.02	115.04	149.33	163.96	155.51	61.41	0.64
32540	158.7	52.9	7	63.37	128.69	NaN	NaN	13.96	43.63	71.72	85.65	95.7	77.46	42.5	NaN
32547	158.3	53.1	40	38.77	119.72	15.29	10.92	12.32	38.66	60.58	80.29	90.05	70.98	18.29	19.33
32562	156.3	52.83	30	31.52	101.36	8.21	6.74	15.28	38.44	65.9	78.28	88.61	54.86	8.37	8.12
32583	158.65	52.98	32	32.02	126.56	0	0.12	10.39	43.95	72.09	86.06	95.97	77.72	13.9	0
32586	158.72	52.88	126	20.12	84.41	0	0.11	6.69	22.94	36.23	47.94	57.04	49.81	10.09	0
32594	156.48	51.48	28	23.92	42.29	NaN	NaN	7.91	21.88	27.75	34.88	29.58	11.53	53.94	NaN
33008	23.68	52.12	143	1.33	15.68	0	0.01	0.46	2.49	4.66	6.07	1.81	0.02	0	0
33019	26.12	52.12	142	5.35	13.6	NaN	1	2.25	4.12	6.64	7.91	7.31	4.22	NaN	NaN
33027	27.87	52.22	137	7.78	20	NaN	1	3.41	7.29	8.55	11.9	11.95	5.75	NaN	NaN
33036	29.17	51.95	190	9.66	21.81	NaN	NaN	3.28	6.63	10.32	13.29	13.16	7.83	NaN	NaN
33038	29.83	52.25	142	1.51	16.69	0	0	0.74	2.89	5.56	8.7	3.3	0.03	0	0
33041	30.95	52.4	144	6.57	18.3	NaN	3	3.61	5.32	7.05	10.35	8.92	8.5	NaN	NaN
33058	33.95	52.05	190	12	29.05	NaN	2.17	3.24	8.53	14.2	18.65	16.45	10.86	NaN	NaN
33088	26.62	51.28	156	7.54	21.56	NaN	2	2.99	4.06	8.74	8.21	14.54	11.5	NaN	NaN
33105	28.33	51.78	141	7.01	16	NaN	1	2.61	5.05	7.02	8.42	8.83	7.17	NaN	NaN
33166	34.68	51.57	204	3.61	24	0.01	0.09	1.81	5.83	8.02	9.7	6.35	0.12	0	0
33173	24.68	51.22	174	5.58	14.72	NaN	0.5	4.53	3.7	4.71	7.43	6.78	4.25	NaN	NaN
33177	24.32	50.83	194	4.04	11.29	NaN	2	3.27	3.4	3.92	5.74	3.99	1	NaN	NaN
33213	28.78	51.32	170	7.89	22.37	NaN	1	3.74	5	8.49	14.12	10.37	1.5	NaN	NaN
33228	29.58	50.7	132	8.56	24.32	NaN	8.29	6.26	7.45	7.69	12.38	15.22	10.33	NaN	NaN
33246	31.9	51.05	126	7.62	18.28	NaN	7.5	4.35	7.54	8.83	10.73	7.69	15	NaN	NaN
33261	33.2	51.23	149	7.61	19.44	NaN	4.5	3.43	7.15	8.28	11.44	9.33	8.83	NaN	NaN
33268	33.45	50.77	169	9.67	25.72	NaN	8	4.19	9.27	11.29	14.61	12.34	12.25	NaN	NaN
33271	34.33	51.15	156	9.3	21.72	NaN	3.83	3.21	8.33	12.05	14.86	12.82	11.92	NaN	NaN
33297	25.15	50.1	228	6.03	18	NaN	7	6.85	4.1	7.64	7.19	3.94	1	NaN	NaN
33317	27.03	50.17	278	8.56	27	NaN	2	5.71	5.77	8.84	12.93	12.94	8.75	NaN	NaN
33345	30.57	50.4	167	2.39	26.74	0	0.01	1.44	4.63	6.51	13	6	0.06	0	0
33347	30.97	50.33	122	6.42	15.18	NaN	10.5	6.83	6.98	5.73	8.14	6.73	6.5	NaN	NaN
33356	31.8	50.22	128	6.81	17.71	NaN	9.5	4.88	6.27	6.15	9.7	7.81	7.75	NaN	NaN
33376	33.98	50.37	154	7	20	NaN	7	4.73	6.79	9.06	9.21	9.47	10.5	NaN	NaN
33377	33.02	50	158	2.12	20.48	0	0.07	1.49	4.44	6.52	8.71	5.65	0.1	0	0
33393	23.95	49.82	323	1.6	19.52	0	0.01	1.68	4.93	6.11	7.22	2.83	0.04	0	0
33409	24.95	49.43	304	5.72	16.33	NaN	4	3.16	4.44	7.78	6.9	6.43	3	NaN	NaN
33464	30.12	49.75	180	6.35	17.53	NaN	6	5.54	5.81	5.81	9.28	8.9	8	NaN	NaN
33484	32.03	49.68	96	5.62	14.59	NaN	10.5	3.77	5.28	5.46	6.63	8.68	4	NaN	NaN
33495	33.27	49.62	96	7.67	16.94	NaN	14	4.99	5.53	7.96	9.45	9.75	7.33	NaN	NaN
33506	34.55	49.6	160	7.24	16.11	NaN	4.5	5.09	6.48	8.05	9.82	8.35	5.88	NaN	NaN
33557	27.27	48.85	290	7.08	22.39	NaN	1	3.23	4.39	10.29	12.14	9.91	3.75	NaN	NaN
33562	28.6	49.23	298	2.28	23.6	0	0.01	1.56	4.93	8.17	9.39	7.09	0.11	0	0
33586	30.9	49.08	215	6.22	20.53	NaN	7	3.98	5.79	5.53	8.24	8.91	5.5	NaN	NaN
33587	30.23	48.77	216	8.34	24.33	NaN	3	3.05	6.37	9.25	12.05	14.81	2.67	NaN	NaN
33609	32.67	48.72	181	5.74	15.44	NaN	2.5	2.17	5.28	5.85	7.45	5.8	2	NaN	NaN
33631	22.27	48.63	124	1.12	17.56	0	0	0.33	3.69	6.15	4.11	0.49	0	0	0
33651	25.03	48.53	298	6.01	18.56	NaN	1	3.3	4.88	6.82	7.68	5.63	2.75	NaN	NaN
33657	25.22	47.87	763	16.77	47.72	NaN	3.67	7.61	11.69	17.43	19.77	22.9	32	64	NaN
33658	25.9	48.37	246	1.69	19.96	0	0	0.48	3.08	5.8	10.21	3.53	0.01	0	0
33663	27.78	48.45	78	7.25	22.67	NaN	2.5	3.52	5.09	9.51	10.69	7.47	7.97	NaN	NaN
33699	30.85	48.05	103	6.56	19.11	NaN	2	3.67	4.76	8.37	8.27	6.35	12.5	NaN	NaN
33723	33.9	48.43	118	4.97	12.44	NaN	3	2.83	3.55	6.27	6.08	4.72	1	NaN	NaN
33748	28.08	47.33	232	7.63	20.9	NaN	1.5	3.81	3.92	7.8	10.36	11.64	5	NaN	NaN
33761	30.27	47.85	183	6.58	17.83	NaN	3.75	5.79	3.87	6.3	8.97	8.52	10.33	NaN	NaN
33788	32.47	47.42	84	3.9	10.78	NaN	2.5	3.67	4.01	3.38	4.29	3.6	3.17	NaN	NaN
33815	28.98	47.02	173	1.05	17.74	0	0	0.53	3.02	3.17	4.49	2.58	0.01	0	0
33837	30.77	46.43	42	0.17	6.08	0	0	0.02	0.3	0.64	1.13	0.35	0	0	0
33862	33.28	47.32	56	2.87	6.89	NaN	NaN	3.32	1.95	2.2	3.32	3.43	NaN	NaN	NaN
33877	34.4	46.85	53	3.31	7.33	NaN	3	5.63	2.5	2.95	2.79	3.55	NaN	NaN	NaN
33883	28.63	46.3	133	4.13	10.95	NaN	NaN	7.11	2.02	4.08	5.76	4.61	3	NaN	NaN
33889	28.85	45.22	30	0.41	12.32	0	0	0.48	0.66	1.06	1.77	0.57	0	0	0
33910	34.82	46.16	15	0.32	7.54	0	0	0.01	0.46	1.77	1.36	0.17	0	0	0
33915	33.88	46.45	30	0.27	7.36	0	0	0.02	0.73	1.29	1.29	0.34	0	0	0
33945	33.95	44.83	176	4.71	13.32	NaN	NaN	4.67	2.08	4.15	3.16	9.36	NaN	NaN	NaN
33946	34.13	44.68	181	0.44	11.2	0	0	0.21	0.94	2.07	1.87	0.77	0	0	0
33976	35.38	45.03	26	0.34	10.25	0	0	0	0.28	1.54	1.96	0.53	0	0	0
33983	36.42	45.4	49	0.25	7.6	0	0	0.01	0.34	1.06	1.72	0.7	0	0	0
34003	36.3	52.31	251	6.19	32.33	0	0.06	2.31	8.25	16.88	22.3	17.37	0.61	0	0
34009	36.17	51.77	247	4.65	28.37	0	0.02	2.44	6.37	12.32	19.17	14.21	0.63	0	0
34013	37.6	52.43	179	12.01	22.29	NaN	4.5	5.29	10.71	12.57	16.48	12.83	9.4	NaN	NaN
34026	39.15	52.15	135	4.91	28.71	0	0.13	1.89	7.79	13.62	18.28	12.89	0.5	0	0
34027	38.13	51.78	191	12.26	28.68	NaN	4.19	6.54	9.2	10.53	12.55	13.9	46.42	62	NaN
34047	41.48	51.83	147	16.12	39.89	NaN	3	5.97	11.29	19.25	23.28	19.86	10.58	NaN	NaN
34056	43.78	52.25	213	18.64	32.25	NaN	2	5.91	13.13	23	27.9	24.95	19.81	NaN	NaN
34059	43.6	51.9	161	7.2	37.07	0	0.05	1.81	8.13	17.62	27.51	24.18	1.94	0	0
34063	45.4	52.28	199	22.39	39.93	NaN	2.81	8.12	15.22	26.17	35.32	35.42	20.73	NaN	NaN
34069	45.03	51.87	206	19.8	36.1	NaN	2.79	6.61	15.69	22.18	31.03	28.44	19.76	NaN	NaN
34072	46.37	52.33	302	27.88	49.23	NaN	5	9.82	18.49	29.6	38.91	44.44	26.59	NaN	NaN
34083	48.08	52.5	88	27.5	54.73	NaN	4.7	8.18	19.79	35.32	44.08	40.67	20.69	NaN	NaN
34098	48.83	52.03	38	14.55	27.67	NaN	2.88	4.72	10.81	17.13	22.3	20.92	9	NaN	NaN
34109	36.32	51.2	192	12.18	30.41	NaN	5.83	4.94	7.93	15.89	19.45	13.06	10	NaN	NaN
34110	37.35	51.17	223	3.16	21.97	0	0.13	1.92	5.32	8.3	12.2	7.82	0.36	0	0
34116	37.88	51.3	218	9.26	19.97	NaN	8.5	4.95	8.15	10.24	13.32	8.94	10.33	NaN	NaN
34122	39.1	51.7	104	13.88	31.87	NaN	NaN	4.99	9.02	14.17	19.54	16.49	NaN	NaN	NaN
34123	39.22	51.8	147	4.89	31.87	0	0.06	2.91	7.54	13.84	19.37	13.21	0.34	0	0
34139	40.7	51.05	194	3.84	24.07	0	0.08	1.28	5.37	10.12	15.23	10.64	0.28	0	0
34146	42.08	51.37	106	14.79	33.66	NaN	1.94	5.67	9.55	17.84	22.52	18.38	13.64	NaN	NaN
34152	43.15	51.55	159	5.76	31.69	0	0.03	1.93	8.95	16.73	22.32	15.74	0.56	0	0
34163	45.45	51.63	201	9.42	46.24	0	0.1	3.4	11.42	23.32	33.91	31.71	2.28	0	0
34172	46	51.6	166	6.92	39.87	0	0.06	2.8	9.09	17.92	27.77	23.1	0.57	0	0
34186	48.3	51.37	111	7.46	37.18	0	0.08	2	7.83	15.75	25.6	26.29	1.91	0	0
34199	49.73	51.2	104	12	21.31	NaN	3.13	3.97	8.72	14.11	18.21	14.59	6.2	NaN	NaN
34202	35.77	50.8	226	3.49	24.5	0	0.09	2.08	6.5	11.1	12.95	6.45	0.41	0	0
34213	37.87	50.75	140	7.91	18.07	NaN	4.25	4.2	7.19	8.14	10.01	6.81	2	NaN	NaN
34214	36.58	50.63	224	12.13	25.67	NaN	5	9.03	9.35	13.47	16.5	14.68	10.38	NaN	NaN
34231	39.5	51	115	9.81	22.14	NaN	4	5.83	7.55	10.99	15.23	9.61	4.88	NaN	NaN
34238	40.42	51.48	154	16.86	40.34	NaN	5	5.98	11.91	20.34	25.41	19.9	7.7	NaN	NaN
34240	42	50.8	110	3.9	26.87	0	0.04	1.36	5.3	10.06	13.85	8.57	0.26	0	0
34247	41.05	50.4	92	3.06	23.7	0	0.01	1.1	4.36	8.49	10.97	7.61	0.31	0	0
34253	43.73	50.95	132	12.94	26.33	NaN	0.8	4.84	8.46	14.96	20.1	14.61	9.2	NaN	NaN
34254	42.68	50.53	98	9.64	21.78	NaN	1.4	4.19	6.76	11.46	13.95	10.28	19.08	NaN	NaN
34262	44.57	50.83	114	11.79	25.68	NaN	1	4.17	7.31	13.1	18.95	15.91	10.08	NaN	NaN
34267	44.12	50.37	102	10.66	21.31	NaN	1.4	4.62	7.38	11.92	15.68	12.38	13.44	NaN	NaN
34289	48.1	50.4	32	4.05	23.52	0	0.06	1.71	5.78	11.36	15.46	10.17	0.3	0	0
34300	36.13	49.98	155	2.38	21.64	0	0.01	1.48	3.06	5.89	10.69	6.87	0.21	0	0
34312	37.38	50.07	175	9.68	24.05	NaN	4.5	5.98	7.47	10.35	15.07	11.25	4.8	NaN	NaN
34319	37.7	49.63	83	6.79	18.78	NaN	1.5	4.68	3.65	7.36	9.65	9.36	10.83	NaN	NaN
34321	38.1	50.22	112	3.07	24.29	0	0.02	1.31	4.66	7.32	11.75	6.38	0.27	0	0
34336	40.57	49.93	84	10.41	21.66	NaN	8	6.02	7.4	12.15	14.87	11.39	12.75	NaN	NaN
34344	41.15	49.8	72	7.53	17.67	NaN	10.5	4.33	6.74	8.25	8.32	7.94	8.67	NaN	NaN
34356	43.7	49.8	119	3.42	24.1	0	0	1.28	4.87	9.49	15.07	5.39	0.12	0	0
34357	42.75	49.57	200	9.32	24.59	NaN	2	2.89	5.86	11.76	11.47	10.29	16.17	NaN	NaN
34363	45.37	50.07	119	11.67	23.67	NaN	3.4	4.29	7.98	14.08	15.99	12.72	8.5	NaN	NaN
34373	46.88	50.05	37	7.33	16.74	NaN	1.5	2.11	5.49	8.01	10.56	7.68	17.5	NaN	NaN
34385	47.75	49.77	18	8.48	17.16	NaN	5.17	5	5.68	9.7	11.18	10.86	6.34	NaN	NaN
34391	48.55	50.15	25	3.01	19.43	0	0.02	1.75	3.72	7.77	12.4	9.27	0.1	0	0
34398	49.48	49.67	10	6.14	14	NaN	2	1.53	3.87	8.23	10.41	7.4	6	NaN	NaN
34401	35.45	49.38	159	7.2	16.06	NaN	7	3.85	6.36	9.24	10.9	8.15	12.67	NaN	NaN
34407	35.25	48.8	127	5.5	16.56	NaN	6	3.04	4.03	5.61	7.01	8.3	17.17	NaN	NaN
34409	36.32	48.9	177	6.12	17.44	NaN	3.1	3.62	4.9	7.18	7.23	8.43	17	NaN	NaN
34415	37.3	49.18	78	5.42	15.33	NaN	2	5.33	3.62	5.79	7.59	5.73	6.83	NaN	NaN
34421	38.17	49.42	89	6.14	17.78	NaN	3	4.88	4.51	6.26	9.46	6.77	11.5	NaN	NaN
34432	40.17	49.38	145	2.11	18	0	0.07	1.04	3.71	6.45	8.54	4.47	0.09	0	0
34434	39.58	49.22	75	7.82	21.58	NaN	3	6.33	5.74	6.34	8.69	12.62	15.83	NaN	NaN
34438	40.38	48.93	155	8.13	20.04	1	3.05	3.22	7.4	8.69	11.68	9.66	2.62	6	NaN
34445	41.83	49.22	91	8.46	27.3	NaN	2	3.24	6.79	9.64	10.23	10.7	18	NaN	NaN
34476	46.85	49.13	6	3.52	29.97	0	0.01	0.66	3.23	9.55	16.23	9.32	0.09	0	0
34509	36.23	48.13	175	4.38	11.67	NaN	2	2.12	3.24	5.55	4.56	5.71	12.5	NaN	NaN
34510	37.98	48.6	124	5.97	14.41	NaN	1	4.23	3.88	4.85	6.94	4.92	10.38	NaN	NaN
34524	38.43	48.35	334	3.04	21.23	0	0.02	0.99	5.65	7.69	11.35	6.21	0.07	0	0
34535	40.3	48.3	51	6.43	15.15	NaN	6	3.33	5.63	4.85	6.95	6.36	12	NaN	NaN
34537	39.5	48.08	302	7.75	18.11	NaN	1	3.14	6.3	8.78	9.94	10.71	16.75	NaN	NaN
34545	41.87	48.35	90	5.78	14.3	NaN	1.25	3.3	4.82	5.86	7.68	6.44	7.89	NaN	NaN
34555	43.12	48.33	68	6.77	15.26	NaN	3	2.24	4.87	7.19	8.28	8.33	28	NaN	NaN
34561	44.45	48.67	113	2.28	20.55	0	0.02	0.77	3.5	7.27	9.53	4.94	0.05	0	0
34578	46.12	48.07	5	5.56	11.96	NaN	2	3.38	4.62	5.55	7.05	6.22	13	NaN	NaN
34579	46.73	48.22	34	1.64	16.76	0	0	0.35	2.37	5.39	7.97	2.93	0.01	0	0
34607	35.33	47.27	88	4.48	11.83	NaN	2	3.63	2.35	4.66	4.21	8.96	8	NaN	NaN
34609	36.33	47.33	221	4.11	9.5	NaN	2	3.7	3.64	4.17	3.39	5.55	44	NaN	NaN
34615	37.35	47.62	267	7.66	19	NaN	2	5.27	5.77	7.86	9.88	9.72	29.38	NaN	NaN
34622	38.52	47.8	164	5.81	16.28	NaN	1	4.83	5.11	5.94	7.25	7.31	8.25	NaN	NaN
34625	38.88	47.57	43	5	13.19	NaN	2.33	1.79	4.83	5.01	6.19	5.5	6.83	NaN	NaN
34635	40.27	47.7	118	7.08	15.41	NaN	5	4.67	6.38	6.13	7.8	7.59	27.67	NaN	NaN
34644	41.1	47.58	66	5.88	14	NaN	2	3.4	5.34	5.25	5.7	7.25	11	NaN	NaN
34646	42.12	47.63	65	1.17	16.14	0	0	0.32	2.06	4.12	4.65	1.85	0	0	0
34655	43.15	47.63	49	6.13	15.71	NaN	6	4.57	4.1	7.13	7.91	7.16	NaN	NaN	NaN
34662	44.7	47.93	9	5.36	12.81	NaN	9	4.75	4.39	4.32	6.38	7.35	16	NaN	NaN
34691	48.8	47.9	-10	5.08	12.06	NaN	1	1.02	2.12	5.69	7.25	4.1	2	NaN	NaN
34708	35.85	46.68	19	2.75	5.71	NaN	NaN	1.75	1.07	3.19	3.02	4.51	NaN	NaN	NaN
34720	38.9	47.2	30	0.95	13.68	0	0	0.29	1.72	2.89	3.44	1.39	0	0	0
34730	39.82	47.27	74	1.09	14.85	0	0	0.22	1.11	3.17	4.99	2.35	0	0	0
34731	39.8	47.2	77	8.32	17.89	NaN	NaN	4	4.49	9.42	12.46	18.73	NaN	NaN	NaN
34737	39.62	46.53	22	5.23	12.59	NaN	3.5	3.46	3.9	5.57	5.94	5.36	NaN	NaN	NaN
34740	41.35	46.52	0	1	14.82	0	0.02	0.31	1.55	3.76	4.51	1.25	0	0	0
34743	42.48	47.15	72	4.59	11.32	NaN	1	2.78	4.61	4.22	4.28	5.31	4	NaN	NaN
34747	41.1	46.6	112	1.71	19.37	0	0	0.46	3.12	7.14	8.08	2.05	0	0	0
34748	41.73	46.7	25	4.81	11.79	NaN	2	3.78	3.32	5.8	5.19	3.88	NaN	NaN	NaN
34753	43.93	47.12	81	3.96	9.54	NaN	2	1.75	2.56	3.85	5.39	4.32	4	NaN	NaN
34759	43.67	46.57	106	1.13	15.41	0	0.04	0.4	1.79	4.39	4.62	1.34	0.04	0	0
34785	47.93	46.92	-19	3.58	7.35	NaN	2	2.67	2.48	3.24	3.82	4.42	NaN	NaN	NaN
34798	49.27	46.6	-23	2.86	6	NaN	4.11	2.79	2.27	2.2	3.92	2.62	1	NaN	NaN
34824	38.15	46.03	3	0.38	9.21	0	0	0.01	0.39	3.09	1.91	1.09	0	0	0
34825	38.97	46.07	17	6.59	16.41	NaN	NaN	4.45	4.69	6.11	9.48	10.32	18.3	NaN	NaN
34838	40.08	45.85	78	5.81	13.27	NaN	3.5	4.33	5.27	6.16	7.06	5.53	NaN	NaN	NaN
34845	41.97	46.07	86	4.48	12.13	NaN	5.25	4	2.96	4.94	4.9	4.48	NaN	NaN	NaN
34858	43.35	45.92	87	4.27	10.81	NaN	4	6.21	2.03	5.22	4.84	4.46	NaN	NaN	NaN
34861	44.33	46.37	155	1.17	14	0	0	0.12	1.6	4.52	5.58	1.95	0.03	0	0
34866	45.35	46.18	-7	0.71	12	0	0.01	0.24	0.65	2.22	2.96	0.89	0	0	0
34880	47.98	46.28	-22	0.49	7.29	0	0	0	0.66	2.35	2.58	0.92	0	0	0
34887	47.22	45.8	-18	2.75	6.81	NaN	1	3.75	2.23	2.36	2.75	2.87	NaN	NaN	NaN
34922	38.93	45.63	22	5.42	13.26	NaN	NaN	4.37	3.57	4.82	6.93	6.6	NaN	NaN	NaN
34924	38.12	45.28	9	4.74	10.96	NaN	NaN	4.31	3.6	4.63	5.02	5.14	NaN	NaN	NaN
34927	39	45.05	28	0.68	19.59	0	0	0.12	1.65	2.76	2.34	0.74	0	0	0
34936	40.57	45.43	106	6.77	13.96	NaN	3	5.11	5.07	7.4	7.7	4.63	NaN	NaN	NaN
34949	42.08	45.12	452	2.41	28.66	0	0.06	0.96	4.86	7.85	11.56	3.17	0.03	0	0
34954	42.85	45.35	140	5.18	12.85	NaN	3	6.99	4.71	4.89	4.66	3.94	NaN	NaN	NaN
34958	43.45	45.1	162	5.15	14.52	NaN	4.5	6.32	4.4	5.65	5.46	3.8	NaN	NaN	NaN
34964	44.2	45.4	76	4.02	11.81	NaN	10	7.43	2.77	4.56	4.58	2.63	NaN	NaN	NaN
34984	47.35	45.4	-24	0.34	8.62	0	0	0.18	0.47	0.85	1.07	0.49	0	0	0
35001	50.47	52.38	64	16.25	30.07	NaN	NaN	3.8	9.47	16.68	25.13	25.27	11.38	NaN	NaN
35007	50.3	51.9	71	6.92	33.76	0	0.12	2.5	11.22	19.63	26.13	20.21	0.89	0	0
35011	53.13	52.43	123	7.28	33.14	0	0.21	4.15	13.02	22.46	25.61	18.67	0.63	0	0
35015	53.63	52.08	139	17.26	30.9	NaN	4.33	3.97	10.54	20.76	28.66	27.33	14.02	NaN	NaN
35026	57.4	52.2	521	27.07	98.79	0.01	1.32	14.43	39.65	68.46	81.53	84.72	29.91	0.04	0
35037	58.18	51.87	341	16.15	28.73	NaN	3.54	5.43	11.97	19.33	24.73	24.85	14.7	NaN	NaN
35041	60.35	52.43	310	7.23	34.13	0	0.46	5.07	12.49	19.47	25.19	22.02	1.49	0	0
35067	66.33	51.88	221	9.2	18.05	5	1.55	3.44	9.55	12.88	14.54	10.93	2.67	NaN	NaN
35078	68.37	51.82	304	8.73	34.21	0	0.44	5.68	13.31	19.55	26.55	25.37	5.46	0	0
35085	70.95	52	384	31.13	61.32	2.5	2.52	9.13	22.01	40.85	53.98	55.57	29.63	2	NaN
35108	51.28	51.15	37	7.22	38.35	0	0.05	2.3	9.57	20.89	29.1	25.99	0.94	0	0
35118	54.1	51.08	105	11.27	23.5	NaN	2.9	3.17	7.72	16.7	18	15.16	5.43	NaN	NaN
35121	55.1	51.68	117	6.64	33.7	0	0.1	3.75	9.77	17.86	24.26	22.34	1.17	0	0
35125	56.42	51.42	131	13.91	25.07	NaN	3.67	4.22	9.71	18.18	22.43	18.44	11.05	NaN	NaN
35127	55.6	51	144	7.3	34.38	0	0.1	2.38	11.27	21.35	27.58	22.51	0.98	0	0
35138	58.6	51.07	285	16.75	29.61	NaN	4.6	7.35	12.91	20.67	25.6	21.83	9.43	NaN	NaN
35173	69.8	51.62	305	14.25	27.11	2.5	1.99	4.56	12.99	19.75	24.17	23.17	10.33	NaN	NaN
35188	71.37	51.13	350	7.65	30.92	0	0.53	5.47	14.15	20.6	24.33	22.52	0.87	0.05	0
35217	52.57	50.25	32	11.2	22.42	2	1.19	3	8.16	15.31	19.66	18.05	7.11	2.5	NaN
35225	56.53	50.75	178	16.09	54.63	NaN	1.69	3.65	9.5	23.44	28.2	20.87	1.1	NaN	NaN
35229	57.15	50.28	219	7.12	34.24	0	0.07	2.4	10.44	22.02	27.47	22.26	1.47	0	0
35233	59.65	50.75	277	9.8	39.07	0	0.23	3.56	12.52	24.45	33.28	32.35	2.53	0	0
35302	51.17	50.2	17	15.28	37.47	NaN	5.89	4.51	9.54	15.79	25.36	25.09	16.83	NaN	NaN
35344	60.13	49.95	229	11.75	24.61	5	5.75	2.2	7.89	14.65	18.7	18.12	9.24	NaN	NaN
35358	63.5	49.63	136	8.55	41.24	0	0.05	1.75	10.25	29.31	38.21	27.73	1.33	0	0
35361	65.23	50.13	142	14.1	26.78	NaN	3.4	2.68	8.95	20.77	23.8	18.28	5.1	NaN	NaN
35376	69.52	49.88	349	9.98	21.63	NaN	2.85	3.88	8.63	12.46	14.72	13.59	6.09	NaN	NaN
35394	73.15	49.8	553	5.78	29.36	0	0.29	3.54	9.99	17.55	23.61	15.22	0.2	0.03	0
35406	51.87	49.05	2	3.91	22.6	0	0	0.37	5.63	12.52	17.21	10.06	0.01	0	0
35416	54.68	49.07	128	6.12	32.42	0	0.01	1.47	8.8	16.06	24.56	24.12	0.8	0	0
35426	57.12	49.15	234	11.9	24.11	NaN	3.76	3.08	7.57	15.24	18.97	18.3	11.43	NaN	NaN
35430	59.55	49.25	260	13.39	25.72	NaN	2.24	3.23	9.42	17.13	19.44	19.78	9.48	NaN	NaN
35436	57.67	49.23	234	14.03	24.65	NaN	5.2	4.54	11.38	18.08	19.93	17.39	11.13	NaN	NaN
35437	58.15	48.82	230	9.31	21	NaN	3.81	3.12	7.66	12.9	14.59	11.59	8.06	NaN	NaN
35449	62.1	48.83	82	6.7	14.18	1	1.81	1.52	4.9	8.88	11.64	9.89	3.05	6	NaN
35497	72.87	48.85	656	12.68	29.06	2.83	1.73	4.93	12.89	18.65	24.07	21.25	4.9	2.5	NaN
35514	52.92	48.45	0	6.94	15.47	NaN	1.7	2.23	4.78	8.52	11.2	8.98	2.33	NaN	NaN
35522	56.03	48.73	186	8.61	16.72	NaN	5.33	1.69	5.2	10.92	11.75	9.41	1	NaN	NaN
35529	57.12	48.22	151	9.53	19	1	1.82	2.52	6.9	12.74	14.77	12.76	6.35	3.3	8
35532	58.5	48.63	398	6.1	13.84	2	2.33	3.35	5.4	8.23	9.44	6.25	2.25	11	NaN
35542	61.27	48.61	114	3.08	15.26	0	0.01	0.73	3.78	9.9	12.32	8.59	0.04	0	0
35549	62	48.25	74	9.91	20.22	NaN	1.88	1.38	4.24	13.03	16.97	13.26	3.92	NaN	NaN
35576	69.65	48.3	361	6.84	34.08	0	0.05	1.72	8.38	21.7	29.32	22.89	0.23	0	0
35633	59.62	47.85	176	10.5	22.79	NaN	3.13	2.75	3.88	12.16	16.25	14.3	7.03	NaN	NaN
35663	66.75	47.83	508	5.22	25.52	0	0	0.51	5.15	13.47	21.52	20.43	1.18	0	0
35671	67.72	47.8	346	10.26	25.39	1	2.04	2.8	5.94	16.58	18.56	10.09	6.79	NaN	NaN
35699	74.82	47.45	620	9.36	23.06	1	1.31	3.18	7.1	13.54	15.72	13.96	5.31	NaN	NaN
35700	51.91	47.12	-22	1	12.32	0	0	0.15	1.27	3.23	5.1	1.59	0	0	0
35746	61.65	46.78	62	1.21	11	0	0	0.19	1.88	5.66	5.31	2.25	0.02	0	0
35749	62.5	46.72	80	7.11	13.41	NaN	1.5	1.53	4.81	10.33	8.9	8.59	2.67	NaN	NaN
35791	73.35	47.2	581	11.3	22.89	NaN	2.03	2.53	6.42	13.97	18.68	18.85	7.17	NaN	NaN
35796	75.08	46.8	350	1.62	11.54	0	0	0.19	2.48	6.7	7.65	4.29	0.01	0	0
35849	62.12	45.77	68	5.96	14.56	NaN	2.25	2.01	3.45	7.39	8.47	7.44	11	NaN	NaN
35953	64.08	45.5	103	4.37	11.06	NaN	1.25	1.67	3.22	5.84	6.11	4.89	2	NaN	NaN
35969	67.07	45.25	138	6.06	14.26	NaN	1	1.51	3.43	5.85	9.19	6.85	1	NaN	NaN
36003	76.93	52.3	122	9.28	18.61	NaN	4.22	4.78	9.63	13.02	15.68	10.82	2.87	NaN	NaN
36012	78.33	52.35	149	13.8	26.39	NaN	3.19	5.9	13.23	18.27	22.85	21.44	3.91	2.5	NaN
36020	80.17	52.48	158	13.2	24.93	NaN	3.39	5.45	10.84	16.16	20.56	21.51	8.07	NaN	NaN
36021	79.18	52.25	142	10.75	17.71	NaN	3.38	5.73	9.04	12.67	15.27	13.12	5.89	NaN	NaN
36022	80.37	52.02	208	18.8	34.59	2	3.6	7.92	16.92	23.46	28.11	29.56	12.67	NaN	NaN
36034	81.22	51.58	219	5.11	24.21	0	0.23	4.68	10.59	13.7	16.36	13.2	0.9	0	0
36038	82.2	51.15	355	11.07	51.42	0	0.85	7.31	19.17	29.63	36.19	38	5.22	0.06	0
36045	84.32	51.63	409	6.89	38.03	0.01	1.2	6.98	11.74	18.15	23.82	17.88	1.97	0.12	0
36055	86	51.9	324	13.51	57.04	0	1.23	9.02	23.19	37.03	44.66	41.16	5.31	0.06	0
36058	86	51.43	420	4.85	11.82	NaN	4.63	4.64	5.48	6.02	5.61	3.47	1.56	4	NaN
36061	87.12	52.25	326	44.49	74.29	NaN	7	17.71	37.04	53.54	64.62	67.75	38.99	9.88	NaN
36064	87.6	51.8	480	7.17	32.17	0	1.44	6.84	12.31	14.79	18.37	17.19	2.86	0.11	0
36096	94.5	51.72	626	5.42	22.52	0	0.1	4.5	11.05	17.24	18.92	9.34	0.02	0	0
36099	94.52	51.15	947	9.8	32.69	0.01	1.06	11.28	20.19	25.63	27.95	26.74	1.72	0.1	0
36103	96.1	52.47	919	8.1	29.45	0.03	0.64	7.13	16.04	21.93	24.46	22.03	3.36	0.06	0
36152	78.35	50.87	149	8.58	20.28	2	2.24	3.85	7.98	10.57	12.63	12.01	11.74	1	NaN
36177	80.3	50.42	196	4.31	24.22	0	0.14	2.91	8.44	12.94	16.4	10.66	0.1	0	0
36186	81.92	50.63	320	21.65	49.83	NaN	1.36	8.48	21.92	31.89	37.54	37.31	6.8	NaN	NaN
36208	83.55	50.33	811	26.25	57.42	4.13	6.79	13.93	24.06	36.06	45.89	41.48	14.67	3.67	NaN
36229	85.62	50.28	978	7.08	30.21	0	0.63	6.45	14.93	20.91	23.57	16.62	0.56	0.01	0
36231	86.13	50.75	833	9.71	16.86	NaN	5.6	5.97	8.49	12.68	13.26	9.51	2.33	NaN	NaN
36259	88.68	50	1758	1.5	7.38	0.01	0.21	1.79	3.42	4.47	4.79	2.56	0.06	0	0
36278	90.43	50.37	1850	0.66	7.46	0.01	0.07	0.87	1.58	2.17	1.48	0.43	0.03	0.02	0
36307	95.12	50.27	1100	5.39	19.7	0	0.24	4.61	10.97	14.87	16.63	13.96	0.7	0	0
36394	81.05	49.58	334	10.7	21.35	NaN	2.95	5.07	11.85	14.67	15.86	13.7	3.1	NaN	NaN
36397	81.22	49.22	455	3.01	9.67	NaN	1.51	2.99	3.26	2.44	3.47	3	2.28	NaN	NaN
36428	84.52	49.2	401	21.43	37.83	NaN	2.36	9.04	18.97	24.86	34	28.08	12.31	NaN	NaN
36442	86.42	50	2601	4.83	30.74	3.93	8.07	7.77	4.65	4.05	3.85	4.49	8.45	7.63	0.84
36498	78.42	48.17	643	14.62	35.94	NaN	3.14	9.6	13.76	16.49	18.84	16.01	21.38	2.5	NaN
36535	82.37	48.75	512	29.51	60.11	NaN	3.07	8.19	29.73	38.56	50.13	44.35	16.06	NaN	NaN
36639	81.62	47.12	491	34.45	69.17	NaN	3.94	12.35	28.27	47.57	58.87	48.12	14.49	NaN	NaN
36665	84.91	47.46	603	4.6	24.04	0	0.08	2.46	7.44	12.98	16.58	15.87	0.25	0	0
36686	76.87	46.55	349	9.13	18.37	NaN	2.33	2.82	5.19	10.68	14.5	9.95	9.5	NaN	NaN
36729	80.93	46.16	397	2.68	21.32	0	0.03	1.05	3.45	9.27	10.86	5.2	0.02	0	0
36736	82.75	46.65	441	12.58	28.74	NaN	1.83	3.52	11.12	18.93	22.24	12.18	0.67	NaN	NaN
36819	75.85	44.13	576	4.71	15.32	NaN	2.5	3.06	3.83	5.51	6.4	6.54	3.78	NaN	NaN
36821	76.27	44.83	396	4.88	10.5	NaN	1.4	3.27	4.09	6.64	5.7	3.52	1	NaN	NaN
36859	80.07	44.16	645	1.23	11.16	0	0	0.2	2.24	6.26	5.75	0.61	0	0	0
36864	75.25	43.53	743	5.94	14.83	NaN	7.5	5.54	4.33	6.9	7.03	4.17	5.2	NaN	NaN
36870	76.93	43.23	851	3.82	30.28	0	0.15	2.36	7.63	13.91	15.46	5.36	0.18	0	0
36974	76	41.43	2041	2.26	17.05	0	0.01	1.33	3.96	7.88	10.45	2.54	0.04	0	0
37001	37.3	44.9	30	0.13	8.21	0	0	0.01	0.1	0.37	0.5	0.28	0	0	0
37013	39.9	44.75	137	9.92	23.37	NaN	3	9.94	8.23	10.7	10.48	6.79	3	3	NaN
37017	39.27	44.28	323	16.66	47.8	NaN	9	9.4	12.4	18.71	23.4	12.47	2.67	2	NaN
37018	39.07	44.1	60	0.19	13.04	0	0	0.03	0.17	0.49	0.89	0.09	0	0	0
37021	40.08	44.62	220	9.41	22.41	NaN	6.5	7.9	8.97	10.75	10.4	6.04	3	NaN	NaN
37031	41.12	45	159	0.87	15.52	0	0	0.2	2.71	5.07	3.67	0.61	0	0	0
37036	41.97	44.63	343	5.52	13.12	NaN	3.67	3.63	6.04	5.6	6.45	4.72	NaN	NaN	NaN
37050	43	44.1	538	1.48	16.4	0	0.02	0.65	4.2	4.97	5.52	2.06	0.01	0	0
37054	43.07	44.23	316	1.24	14.14	0	0.01	0.4	2.99	3.71	3.37	1.01	0.01	0	0
37058	43.47	44.15	302	5.32	14.77	NaN	NaN	3.4	6.49	4.83	6.16	3.93	NaN	NaN	NaN
37061	44.1	44.8	136	0.89	13.92	0	0.01	0.38	2.18	3.24	3.72	0.79	0	0	0
37075	45.83	44.35	19	0.64	13.24	0	0.01	0.18	0.97	1.87	2.66	0.4	0	0	0
37085	46.55	44.4	-21	3.83	8.32	NaN	NaN	2.82	3.29	2.94	3.69	4.38	NaN	NaN	NaN
37089	47.5	44.5	-24	0.18	6.9	0	0	0.03	0.39	0.47	0.84	0.21	0	0	0
37099	39.77	43.58	34	0.12	10.17	0	0	0	0.06	0.74	0.38	0.06	0	0	0
37107	40.2	43.6	566	8.12	87.66	0	0	2.01	10.54	32.56	36.05	14.23	0.5	0	0
37112	41.57	43.87	928	1.53	18.32	0	0.09	1.31	3.43	6.18	5.73	1.22	0.09	0.01	0
37123	42.72	43.9	943	1.31	20.97	0	0.05	0.88	3.29	4.84	4.6	1.63	0.11	0	0
37126	42.67	43.73	2056	3.41	23	0.03	0.5	3.1	6.3	7.83	10.06	10.04	2.24	0.28	0
37145	44.67	43.73	136	5.29	13.73	NaN	NaN	3.11	4.87	5.15	6.8	5.15	NaN	NaN	NaN
37193	41.73	43.45	1325	18.64	53.23	NaN	11.29	12.55	13.98	15.35	19.27	21.02	14.98	NaN	NaN
37196	41.83	43.25	2037	38.89	167.57	0.01	1.25	18.32	52.65	86.46	113.73	120.27	62.79	3.22	0.01
37212	43.63	43.53	425	6.32	13.92	NaN	1	3.29	5.32	6.11	8.16	7.86	1	NaN	NaN
37228	44.7	43	703	2.04	27.24	0	0.03	1.02	3.72	5.9	8.44	2.91	0.12	0	0
37235	45.7	43.35	163	0.82	14.08	0	0.01	0.17	1.67	3.09	4.75	0.26	0	0	0
37244	46.12	43.35	75	0.99	18.37	0	0.04	0.34	1.9	3.02	4.92	0.59	0	0	0
37248	46.58	43.25	117	6.86	15.7	NaN	5.75	5.35	6.77	6.02	8.09	4.54	3	NaN	NaN
37309	43.45	42.58	789	20.1	40.25	NaN	NaN	NaN	12.93	23.6	27.78	24.67	NaN	NaN	NaN
37367	46.2	42.68	980	8.11	28.6	NaN	12.63	6.5	5.73	6.37	11.23	11.22	14.29	NaN	NaN
37416	43.98	42.23	871	16.27	33.69	NaN	7	17.5	12.71	16.18	23.26	13.87	11	NaN	NaN
37432	44.7	42.35	1064	18.69	44.26	NaN	14	6.81	13.86	18.33	34.1	19.82	21.17	NaN	NaN
37437	44.7	42.08	902	36.3	80.3	NaN	21.67	26.04	21.19	14.6	40.72	76.97	143.39	94.48	73.5
37439	44.97	42.12	1091	16.66	43.53	NaN	4	9.61	10.13	16.22	26.08	16.73	7	NaN	NaN
37461	46.25	42.4	2927	13.22	73.97	0.83	6.59	16.56	17.45	16.15	19.3	25.7	31.64	17.58	1.27
37463	46.97	42.4	1399	6.43	15.68	7.5	9.6	6.24	5.14	6.4	6.16	5.36	5.24	10	NaN
37470	48.3	42.1	-19	0.28	14.1	0	0	0.1	0.24	0.45	1.29	0.08	0	0	0
37471	47.12	42.82	473	0.72	16.89	0	0.01	0.31	0.88	2.04	3.3	0.62	0	0	0
37472	47.48	43.01	32	0.43	10.34	0	0	0.04	0.64	3.17	1.93	0.09	0	0	0
37531	44.12	41.98	590	10.69	24.6	NaN	NaN	19.25	4.55	11.18	13.46	8.05	4	NaN	NaN
37535	44.38	41.7	1195	9.27	25	NaN	20	6.17	5.07	7.48	13.31	9.19	3.89	NaN	NaN
37549	44.95	41.68	427	0.35	10.5	0	0	0	0.15	2.48	2.61	0.06	0	0	0
37553	45.38	41.93	562	11.27	22.78	NaN	NaN	8.33	4.92	11.26	16.18	7.94	NaN	NaN	NaN
37556	45.33	41.73	806	10.35	17.83	NaN	NaN	13	8.53	8.77	11.47	11.37	NaN	NaN	NaN
37572	46.3	41.82	435	12.91	26.28	NaN	NaN	8	6.75	13.4	16.59	11.37	NaN	NaN	NaN
37575	46.67	41.55	490	9.77	22.83	NaN	6	3.83	10.16	10.39	12.52	8.64	6.5	NaN	NaN
37597	48.05	41.67	477	5.92	13.29	NaN	NaN	5.33	4.68	6.08	6.03	4.93	4.5	2	NaN
37618	44.28	41.12	1509	12.64	25.39	2	10.59	12	7.64	9.9	13.5	13.5	5	NaN	NaN
37621	44.55	41.45	534	12.27	18.65	NaN	NaN	8	10.33	12.54	12.08	11.83	NaN	NaN	NaN
37661	47.17	41.22	641	10	21.48	NaN	NaN	2	9.17	9.87	11.05	10.41	12	NaN	NaN
37663	47.75	41.47	1015	0.55	18.21	0	0.05	0.66	1.3	1.56	1.71	0.61	0.08	0.02	0
37686	43.83	40.78	1512	3.68	29.29	0	0.01	0.42	3.88	11.02	16.54	9.32	0.01	0	0
37706	44.87	40.75	1255	11.86	33.17	NaN	6.67	6.55	5.16	10.62	12.32	18.2	13	NaN	NaN
37713	45.47	40.92	697	6.12	14.56	NaN	NaN	6.05	5.43	4.2	7.34	8.58	NaN	NaN	NaN
37719	45.36	40.59	1853	10.82	24.12	NaN	11.17	12.3	8.77	8.43	11.73	12.12	6.33	NaN	NaN
37735	46.42	40.71	311	0.07	4.42	0	0	0	0.05	0.75	0.68	0.06	0	0	0
37789	44.46	40.13	1140	1.32	19.52	0	0	0.31	2.16	7.29	7.39	0.77	0	0	0
37792	44.75	40.48	1761	31.5	59.61	NaN	12	14.38	15.83	36.41	48.29	36.24	24.75	NaN	NaN
37801	45.13	40.35	1962	13.44	24.35	NaN	11	8.21	10.8	16.89	19.45	14.51	2.25	NaN	NaN
37897	46.02	39.53	1581	8	18.35	NaN	NaN	7.63	5.75	7.18	9.97	11.9	52.25	NaN	NaN
37899	46.75	39.77	1355	12.21	36.95	NaN	9.83	14.2	10.01	11.2	14.79	18.37	23.53	NaN	NaN
37959	46.43	39.2	706	10.42	22.94	NaN	NaN	14.35	10.87	8.92	10.44	13.58	NaN	NaN	NaN
38051	63.17	44.88	92	4.85	11.53	NaN	0.5	2.38	3.19	6.02	7.14	4.38	1	NaN	NaN
38069	66.75	44.17	153	3.72	11.47	NaN	0.5	0.92	3.73	4.12	4.53	3.17	1.5	NaN	NaN
38081	69.12	44.8	190	3.98	10.06	NaN	1.25	1.77	2.7	3.44	7.02	4.63	2	NaN	NaN
38082	70.02	44.83	207	5.59	11.78	NaN	2.83	1.85	3.98	5.8	7.98	7.19	2	NaN	NaN
38091	71.07	44.8	266	5.32	11.32	NaN	2.33	1.85	2.68	5.56	8.71	6.48	0.67	NaN	NaN
38196	68.9	43.55	822	13.63	42.24	NaN	1.83	5.76	8.93	21.55	23.54	8.05	3.87	NaN	NaN
38198	68.21	43.27	207	0.74	10.52	0	0	0.07	1.56	4.35	3.05	0.18	0	0	0
38203	70.93	43.78	366	4.78	14.17	NaN	5	2.99	3.63	5.16	6.76	4.08	1.5	NaN	NaN
38207	69.37	43.03	365	6.5	19	NaN	4.5	3.18	5.7	9.17	8.38	3.52	3	NaN	NaN
38222	73.78	43.7	456	8.85	23	1	4.64	5.15	7.53	8.21	11.56	9.27	1.84	2	NaN
38262	59.82	42.95	66	0.57	9.5	0	0	0.13	0.81	2.77	2.74	0.23	0	0	0
38264	59.62	42.45	77	3.82	5.12	NaN	4.5	NaN	3.36	4.43	4	3	NaN	NaN	NaN
38316	68.8	42.43	240	6.36	14.06	NaN	7.67	6.07	5.94	7.64	5.52	5.88	5.5	NaN	NaN
38317	68.13	42.13	238	5.87	12.67	NaN	2.5	2.92	5.23	8.07	6.57	4.79	3	NaN	NaN
38334	70.3	42.48	808	13.53	38.37	NaN	7.83	8.29	11.24	18.35	17.46	9.46	9.33	NaN	NaN
38341	71.38	42.85	655	9.14	37.28	NaN	7.13	5.61	7.73	9.24	10.14	11.17	19.02	3.5	12
38343	72.75	42.95	683	6.49	17.67	7	2.85	5.04	4.35	8.94	9.17	5.19	2.17	6	NaN
38345	72.22	42.52	1218	7.04	14.8	8	6.8	5.23	5.91	8.55	5.9	5.27	9.5	12.5	NaN
38353	74.53	42.85	760	1.42	19.32	0	0.07	0.83	3.77	6.9	5.88	1.13	0.02	0	0
38396	60.57	41.57	101	3.06	6.76	NaN	NaN	1	2.15	2.2	2.89	2	NaN	5	NaN
38462	70.37	41.9	1258	41.38	78.68	NaN	4.5	10.2	20.85	45.96	64.8	45.69	NaN	NaN	NaN
38507	52.98	40.03	90	0.02	2.78	0	0	0	0.02	0.1	0.2	0.01	0	0	0
38565	65.68	40.55	485	5.21	11.68	NaN	NaN	4.44	4.43	6.06	4.79	3.85	NaN	NaN	NaN
38579	67.83	40.12	345	8.81	25	NaN	2.5	7.67	9.22	8.36	7.71	6.3	6	NaN	NaN
38582	68.5	40.83	266	6.86	19.84	NaN	7	5.41	5.71	7.66	7.86	8.88	2	NaN	NaN
38583	68.68	40.82	264	6.44	13.68	NaN	6.67	5.06	5.15	6.61	5.25	5.15	NaN	NaN	NaN
38599	69.73	40.21	427	0.26	7.7	0	0	0.03	0.19	1.5	1.74	0.02	0	0	0
38618	71.75	40.37	577	0.44	8.78	0	0	0.04	0.2	2.05	2.89	0.31	0	0	0
38687	63.6	39.08	190	0.05	4.96	0	0	0	0.07	0.59	0.2	0	0	0	0
38696	66.95	39.57	724	0.66	15.96	0	0	0.22	0.98	3.66	2.97	0.22	0	0	0
38713	68.98	39.9	1005	6.54	17.94	NaN	6.04	3.56	4.67	9.67	6.53	3.85	2	7	NaN
38763	56.28	38.98	92	0.22	7.7	0	0	0	0.17	1.1	1.94	0.01	0	0	0
38836	68.78	38.55	800	0.73	17.57	0	0	0.07	1.12	4.11	3.37	0.33	0	0	0
38880	58.33	37.98	211	0.1	6.17	0	0	0.03	0.11	1	0.69	0.03	0	0	0
38895	62.18	37.6	240	0.12	6.57	0	0	0	0.24	1.33	0.32	0.01	0	0	0
38927	67.26	37.23	310	0.06	3.71	0	0	0	0.07	0.42	0.16	0.01	0	0	0
38933	68.78	37.82	429	0.16	7.59	0	0	0.02	0.41	1.48	1.49	0.03	0	0	0
38954	71.5	37.5	2077	5.56	54.76	0	0	0.1	7.03	18.19	26.77	16.91	0.03	0	0
38974	61.21	36.53	275	0.12	7.3	0	0	0.01	0.13	0.92	0.83	0.08	0	0	0
38987	62.35	35.28	625	0.27	12.14	0	0	0.01	0.54	2.5	1.45	0.1	0	0	0
444053	105.3	44.4		1.8	2.9	NaN	8.71	2.15	1.99	1.46	2.67	NaN	NaN	NaN	NaN
449101	110.1	44.9		2.41	4	NaN	NaN	3.35	1.67	1.9	2.81	2.84	NaN	NaN	NaN
457124	112.4	45.7		5.58	9.69	NaN	8.93	6.2	6.44	7.47	6.37	6.09	3.42	NaN	NaN
459154	115.4	45.9		5.66	9.3	NaN	4	5.65	5.65	6.46	6.46	6.05	5.69	NaN	NaN
461007	100.7	46.1		3.22	6.54	NaN	5.44	3.16	3.46	2.78	2.71	3.33	NaN	NaN	2
467133	113.3	46.7		4.54	7.31	NaN	NaN	3.85	4.13	4.9	5.25	4.99	NaN	NaN	2
469028	102.8	46.9		4.82	9.79	NaN	6.04	5.04	4.61	5.67	6.99	4.51	6.49	NaN	NaN
473075	107.5	47.3		3.31	5.57	NaN	5.12	3.8	4.38	3.98	3.74	4.58	7.93	NaN	NaN
473107	110.7	47.3		3.81	6.86	NaN	4.4	3.97	4	4.3	5.35	8.13	NaN	NaN	NaN
474015	101.5	47.4		2.83	7.36	NaN	7.76	3.59	2.43	2.38	2.3	2.51	10.33	4.5	NaN
477070	107	47.7		4.8	7.93	NaN	3.89	3.56	3.81	5.86	5.4	5.76	11.7	11.35	NaN
479070	107	47.9		3.74	6.55	6.53	2.39	3.41	3.59	4.51	4.21	3.52	2.67	NaN	3.09
481146	114.6	48.1		3.13	5.42	NaN	NaN	3.02	3.19	3.18	3.1	4.37	2.11	NaN	NaN
483054	105.4	48.3		6.63	14.05	NaN	9.55	4.8	5.92	8.67	9.15	8.07	3.53	NaN	NaN
485014	101.4	48.5		3.58	6.77	NaN	5.48	3.87	3.6	3.85	4.1	3.61	7.27	NaN	NaN
487983	98.3	48.7		8.65	13.93	NaN	5.25	6.19	8.47	10.11	10.84	9.69	7.72	3.03	NaN
489061	106.1	48.9		7.36	11.76	NaN	NaN	4.87	6.14	8.9	10.6	5.53	8.9	NaN	NaN
490041	104.1	49		6.09	11.15	NaN	9.45	5.45	6.66	6.82	5.68	4.5	3.06	NaN	NaN
492054	105.4	49.2		6.87	10.19	NaN	3.4	4.22	5.8	7.54	8.41	6.87	6.81	NaN	NaN
494027	102.7	49.4		4.8	8.07	NaN	5.25	4.7	4.36	5.29	5.69	9.74	NaN	NaN	NaN
496002	100.2	49.6		2.78	5.12	NaN	NaN	3.85	2.62	2.93	3.3	3.94	NaN	NaN	2
496020	102	49.6		4.57	8.13	NaN	NaN	3.26	3.55	5.05	6.4	5.51	NaN	NaN	NaN
496944	94.4	49.6		15.25	24.04	NaN	8.02	8.8	12.65	16.19	18.24	19.87	17.36	NaN	NaN
498067	106.7	49.8		5.18	9.25	NaN	6.56	4.32	5.04	5.87	6.44	5.61	2.29	NaN	NaN
504002	100.2	50.4		6.02	11.29	NaN	7.83	7.64	7.28	5.83	6.46	6.77	8.97	NaN	NaN
50136	122.52	52.97	433	6.89	26.72	0.01	1.28	7.84	14.14	18.52	19.84	17.8	3.05	0.03	0
50246	124.72	52.35	361.9	4.87	21.21	0	1.15	6.98	12.18	15.79	15.64	6.44	1.21	0.05	0
50349	124.33	51.7	494.6	4.87	19.33	0	0.87	5.56	11.22	14.85	15.93	8.62	1.29	0.09	0
50353	126.65	51.72	177.4	4.82	18.75	0	1.23	6.96	11.72	14.11	14.88	6.81	0.54	0.03	0
50425	120.18	50.25	581.4	4.95	19.34	0	0.52	5.07	10.62	14.93	16.59	9.42	0.55	0.04	0
50434	121.68	50.48	732.6	4.44	18.45	0.07	1.03	5.57	10.34	13.02	13.89	8.36	1.01	0.07	0
50442	124.12	50.4	371.7	3.68	17.76	0	0.56	5.12	9.28	11.63	12.05	4.49	0.37	0.02	0
50468	127.45	50.25	166.4	3.64	18.6	0	0.51	5.43	9.02	12.01	10.87	4.59	0.33	0.01	0
50514	117.43	49.57	661.7	1.25	7.82	0	0.17	1.07	3.43	4.95	4.46	1.2	0.19	0.01	0
50527	119.75	49.22	610.2	3.12	15.64	0	0.42	2.43	7.38	10.67	11.01	3.76	0.39	0.02	0
50548	123.72	49.2	286.1	4.31	18.31	0	0.72	5.24	9.52	12.75	13.38	8.01	0.72	0	0
50557	125.23	49.17	242.2	2.75	13.73	0	0.57	3.94	6.72	9.86	9.48	3.01	0.22	0.01	0
50564	127.35	49.43	234.5	4.48	19.13	0	0.74	4.77	10.57	13.17	14.47	7.11	0.4	0.01	0
50603	116.82	48.67	554.2	1.11	6.79	0	0.14	1.11	2.57	3.7	3.49	1.12	0.15	0	0
50618	118.27	48.22	642	2.1	11.24	0	0.31	1.46	4.65	7.36	7.87	2.8	0.35	0.01	0
50632	121.92	48.77	739.7	1.16	12.03	0.02	0.55	2.01	3.64	3.97	2.75	1.13	0.5	0.05	0
50639	122.73	48	306.5	0.44	8.39	0	0.21	0.86	1.52	1.36	0.54	0.33	0.16	0	0
50656	126.52	48.28	269.7	3.51	17.83	0	0.31	3.04	8.61	13.35	14.48	3.76	0.21	0	0
50658	125.88	48.05	234.6	1.55	9.75	0	0.14	1.41	4.39	6.36	5.4	0.94	0.1	0	0
50727	119.93	47.17	997.2	6.57	25.93	0.03	1.47	5.07	14.47	19.08	21.13	15.17	1.57	0.25	0
50742	124.48	47.8	162.7	0.95	8.46	0	0.09	1.08	2.73	3.63	2.29	0.45	0.09	0.01	0
50745	123.92	47.38	147.1	0.59	8.1	0	0.05	0.8	2.06	2.37	0.93	0.5	0.13	0	0
50756	126.97	47.43	239.2	2.52	13.03	0	0.18	2.15	6.69	9.59	9.17	1.84	0.08	0	0
50758	125.9	47.17	247.2	1.11	7.14	0	0.08	0.98	3.1	4.33	3.31	0.57	0.11	0	0
50774	128.92	47.73	240.9	3.63	19	0	0.62	4.05	8.81	12.76	12.36	3.32	0.18	0	0
50775	130.27	47.33	227.9	1.56	14.55	0	0.39	2.2	5.06	5.99	3.6	1.43	0.15	0	0
50788	131.98	47.23	66.4	1.45	13.38	0	0.14	1.54	4.07	5.77	4.2	1.37	0.12	0	0
50834	121.22	46.6	499.7	0.44	10	0	0.24	0.75	1.03	1.29	0.9	0.58	0.16	0	0
50838	122.05	46.08	274.7	0.31	7.83	0	0.08	0.44	0.51	1.11	0.45	0.32	0.07	0	0
50844	123.42	46.4	149.5	0.39	6.29	0	0.04	0.66	1.12	1.26	0.62	0.34	0.08	0	0
50853	126.97	46.62	179.6	1.62	10.86	0	0.09	1.26	4.28	6.79	5.83	1.5	0.06	0	0
50854	125.32	46.38	149.3	0.78	6.46	0	0.06	1.01	2.56	3.25	1.47	0.32	0.05	0	0
50862	128.02	46.98	210.5	3.81	20.61	0	0.13	2.91	9.82	15.05	14.22	2.62	0.11	0	0
50873	130.28	46.82	81.2	2.24	17.29	0	0.26	1.8	6.47	8.61	6.28	1.7	0.08	0	0
50877	129.58	46.3	100.1	1	11.41	0	0.12	1.29	2.88	2.95	2.16	1.28	0.08	0	0
50888	132.18	46.32	83	0.99	10.86	0	0.06	0.8	2.9	3.53	2.73	1.2	0.1	0	0
50915	116.97	45.52	838.9	0.9	7.18	0	0.2	1.18	2.35	3.75	2.7	0.84	0.15	0.01	0
50936	122.83	45.63	155.3	0.35	6.32	0	0.05	0.57	1.01	1.29	0.58	0.33	0.05	0	0
50948	124.02	45	146.3	0.33	5.34	0	0.02	0.38	1.01	1.05	0.56	0.27	0.02	0	0
50949	124.87	45.08	136.2	0.41	6.69	0	0.04	0.58	1.21	1.51	0.82	0.34	0.01	0	0
50953	126.77	45.75	142.3	1.17	10.17	0	0.15	1.22	2.8	4.15	3.25	0.74	0.05	0	0
50963	128.73	45.97	108.6	1.5	10.93	0	0.23	1.74	3.92	4.92	6.46	3.1	0.09	0	0
50968	127.97	45.22	189.7	2.26	16.32	0	0.25	1.91	6.46	8.33	6.51	2.43	0.13	0	0
50978	130.93	45.3	280.8	1.21	14.48	0	0.21	1.2	4.34	5.04	2.46	1.13	0.1	0	0
50983	132.97	45.77	100.2	3.26	21.04	0	0.13	2.28	8.38	13.38	11.44	3.33	0.2	0	0
51053	86.4	48.05	532.6	2.32	17.17	0	0.08	3.82	6.86	6.7	6.79	3.4	0.07	0	0
51059	85.87	47.43	984.1	4.53	23.04	0	0.25	4.49	10.58	16.81	16.11	8.87	0.17	0	0
51068	87.47	47.12	500.9	3	15.45	0	0.02	1.02	5.52	10.48	12.8	5.93	0.01	0	0
51076	88.08	47.73	735.3	8.95	39.76	0	0.04	3.41	16.8	27.51	32.37	26.02	0.73	0	0
51087	89.52	46.98	807.5	6.47	30.82	0	0.06	4.67	14.76	23.2	23.86	13.81	0.07	0	0
51133	83	46.73	534.9	5.63	34.43	0	0.02	3	11.3	22.25	23.69	9.46	0.03	0	0
51156	85.72	46.78	1291.6	0.49	7.1	0	0.02	0.61	1.44	1.95	1.29	0.33	0.04	0	0
51186	90.38	46.67	1218.2	6.94	32.07	0	0.29	5.95	16.22	21.72	24.27	15.73	0.15	0	0
51232	82.57	45.18	336.1	0.3	5.34	0	0	0.12	1.3	2.58	0.96	0.03	0	0	0
51241	83.6	45.93	1077.8	4.22	20.9	0	0.09	2.4	8.65	13.93	15.65	8.7	0.06	0	0
51243	84.85	45.62	449.5	0.63	7.72	0	0	0.19	1.55	3.66	2.3	0.16	0	0	0
51288	90.53	45.37	1653.7	6.76	27.86	0.01	0.45	5.89	12.98	18.72	22.66	19.09	1.64	0.06	0
51330	81.02	44.97	1357.8	2.89	16.48	0	0.12	1.53	4.96	9.46	11.41	5.23	0.17	0	0
51334	82.9	44.62	320.1	1.15	9	0	0	0.09	2.29	5.86	5.94	0.77	0	0	0
51346	84.67	44.43	478.7	2.63	17.24	0	0.01	0.97	5.4	12.08	11.46	1.89	0	0	0
51356	86.05	44.32	442.9	2.59	19.28	0	0.01	1.11	6.71	12.22	8.99	1.13	0.01	0	0
51365	87.53	44.2	440.5	3.19	17.69	0	0.01	1.02	6.12	11.5	14.55	4.26	0.01	0	0
51379	89.57	44.02	793.5	3.93	20.29	0	0.08	1.59	7.84	14.08	16.26	7.05	0.04	0	0
51431	81.33	43.95	662.5	3.6	29.1	0	0.13	0.72	6.7	16.09	17.29	4.09	0	0	0
51437	81.13	43.15	1851	4.46	21.43	0.01	0.4	3.07	8.61	14.08	17.26	10.03	0.43	0.04	0.01
51463	87.65	43.78	935	3.38	27.07	0	0.35	2.51	9.59	15.05	12.86	3.37	0.12	0.01	0
51467	86.3	42.73	1739	0.05	4.54	0	0.03	0	0.01	0.05	0.03	0.03	0.06	0.01	0
51477	88.32	43.35	1103.5	0.06	3.57	0	0.03	0.01	0.15	0.3	0.12	0.03	0	0	0
51526	88.22	42.23	922.4	0.07	2.11	0	0	0.01	0.11	0.3	0.14	0	0	0	0
51542	84.15	43.03	2458	2.32	13.38	0.09	0.28	1.84	4.18	6.25	8.63	6.04	0.55	0.15	0.04
51567	86.57	42.08	1055.3	0.15	4.93	0	0	0	0.16	0.93	0.52	0.01	0	0	0
51628	80.23	41.17	1103.8	0.12	2.75	0	0	0	0.36	0.52	0.21	0	0	0	0
51633	81.9	41.78	1229.2	0.42	7.55	0	0	0.01	0.26	2.01	1.52	0.24	0	0	0
51642	84.25	41.78	976.1	0.1	3.96	0	0	0	0.12	0.54	0.09	0.03	0	0	0
51644	82.97	41.72	1081.9	0.12	4.41	0	0	0	0.15	0.84	0.31	0.02	0	0	0
51656	86.13	41.75	931.5	0.08	3.24	0	0	0	0.19	0.54	0.1	0	0	0	0
51701	75.4	40.52	3504.4	1.55	17.96	0.25	1.29	2.04	2.25	2.25	2.48	3.92	2.42	0.8	0.12
51705	75.25	39.72	2175.7	0.5	11.93	0	0	0.19	0.52	1.09	2.04	1.12	0.02	0	0
51709	75.98	39.47	1289.4	0.16	5.04	0	0	0.01	0.32	0.81	0.84	0.06	0	0	0
51711	78.45	40.93	1984.9	0.42	10.93	0	0.04	0.22	0.9	0.77	1.87	0.96	0.06	0	0
51720	79.05	40.5	1161.8	0.05	2.18	0	0	0	0.08	0.3	0.24	0	0	0	0
51777	88.17	39.03	887.7	0.03	2.03	0	0	0	0.06	0.11	0.03	0.01	0	0	0
51804	75.23	37.77	3090.1	0.25	4.78	0	0.01	0.02	0.48	0.72	1.03	0.32	0.04	0.01	0
51811	77.27	38.43	1231.2	0.08	2.38	0	0	0.01	0.08	0.25	0.13	0.01	0	0	0
51818	78.28	37.62	1375.4	0.06	2.83	0	0	0	0.09	0.16	0.15	0	0	0	0
51828	79.93	37.13	1375	0.06	2.5	0	0	0	0.1	0.25	0.26	0	0	0	0
51839	82.72	37.07	1409.5	0.03	2.03	0	0	0	0.01	0.11	0.03	0	0	0	0
51886	90.85	38.25	2944.8	0.01	1.66	0	0	0	0	0.01	0	0.01	0.02	0	0
51931	81.65	36.85	1422	0.04	1.74	0	0	0	0.03	0.13	0.08	0	0	0	0
52101	93.05	43.6	1677.2	2.49	14.93	0.03	0.52	2.58	6.04	8.17	8.74	2.63	0.25	0.09	0
52118	94.7	43.27	1728.6	0.07	4.45	0	0.07	0.11	0.12	0.05	0.05	0.14	0.05	0.01	0
52203	93.52	42.82	737.2	0.25	5.83	0	0	0.06	0.62	1.29	0.68	0.01	0	0	0
52267	101.07	41.95	940.5	0.01	1.03	0	0	0.01	0.01	0.01	0	0.01	0	0	0
52313	94.67	41.53	1573.8	0.09	3.39	0	0.01	0.14	0.33	0.34	0.13	0.02	0.01	0	0
52323	97.03	41.8	1770.4	0.06	3.69	0	0.03	0.12	0.06	0.11	0.04	0.09	0.03	0	0
52418	94.68	40.15	1139	0.04	2.3	0	0	0.03	0.07	0.16	0.05	0.01	0	0	0
52424	95.77	40.53	1170.9	0.05	3.69	0	0	0.05	0.16	0.08	0.03	0.06	0	0	0
52436	97.03	40.27	1526	0.09	4.59	0	0.01	0.12	0.14	0.23	0.1	0.12	0.01	0	0
52446	99.52	40.3	1177.4	0.02	1.38	0	0	0.01	0.01	0.04	0.02	0	0	0	0
52495	104.8	40.17	1323.9	0.01	1.59	0	0	0.01	0.02	0.03	0.03	0.02	0	0	0
52533	98.48	39.77	1477.2	0.1	3.9	0	0.02	0.09	0.21	0.26	0.13	0.09	0.02	0	0
52546	99.83	39.37	1332.2	0.1	3.79	0	0.01	0.08	0.3	0.26	0.13	0.05	0.01	0	0
52576	101.68	39.22	1510.1	0.03	1.96	0	0	0.02	0.08	0.08	0.04	0.02	0	0	0
52633	98.42	38.8	3367	0.16	6	0.05	0.19	0.25	0.04	0.14	0.19	0.19	0.18	0.26	0.14
52645	99.58	38.42	3320	0.31	7.8	0.13	0.5	0.46	0.22	0.36	0.27	0.41	0.44	0.3	0.04
52652	100.43	38.93	1482.7	0.04	2.59	0	0	0.03	0.15	0.13	0.04	0.03	0	0.01	0
52657	100.25	38.18	2787.4	0.1	5.66	0	0.09	0.09	0.04	0.09	0.13	0.22	0.21	0.06	0
52661	101.08	38.8	1764.6	0.13	5	0	0.02	0.17	0.29	0.37	0.33	0.12	0.02	0.01	0
52674	101.97	38.23	1976.9	0.09	4.86	0	0.03	0.15	0.13	0.14	0.21	0.2	0.04	0	0
52679	102.67	37.92	1531.5	0.07	4.14	0	0	0.07	0.14	0.19	0.17	0.09	0.01	0	0
52681	103.08	38.63	1367.5	0.03	2.41	0	0	0.02	0.05	0.04	0.05	0.02	0	0	0
52707	93.68	36.8	2767	0.01	1.41	0	0	0.01	0.01	0.02	0.01	0.01	0	0	0
52713	95.37	37.85	3173.2	0.11	3.59	0	0	0.02	0.09	0.56	0.21	0.06	0.01	0.01	0
52737	97.37	37.37	2981.5	0.25	6.9	0	0.03	0.01	0.45	1.21	0.57	0.12	0.04	0.01	0
52754	100.13	37.33	3301.5	0.14	6.38	0.01	0.17	0.28	0.05	0.09	0.15	0.24	0.27	0.14	0
52765	101.62	37.38	2850	0.28	10.11	0.01	0.33	0.33	0.22	0.32	0.32	0.67	0.67	0.2	0
52787	102.87	37.2	3045.1	0.59	11.21	0.08	0.68	0.78	0.38	0.46	0.75	1.31	1.19	0.61	0.03
52797	104.05	37.18	1630.9	0.03	2.57	0	0	0.02	0.05	0.06	0.08	0.04	0.01	0	0
52818	94.9	36.42	2807.6	0.01	1.86	0	0	0.01	0.02	0.02	0.01	0.01	0.01	0	0
52825	96.42	36.43	2790.4	0.02	1.21	0	0	0	0.03	0.12	0.01	0	0	0	0
52836	98.1	36.3	3191.1	0.3	7.04	0	0.05	0.42	0.59	0.86	0.59	0.33	0.12	0.05	0
52842	99.08	36.78	3087.6	0.05	4.86	0	0.02	0.04	0.02	0.03	0.07	0.1	0.15	0.03	0
52856	100.62	36.27	2835	0.07	4.96	0	0.01	0.08	0.15	0.11	0.08	0.09	0.08	0	0
52866	101.75	36.72	2295.2	0.05	4.24	0	0.02	0.08	0.03	0.04	0.08	0.09	0.05	0	0
52868	101.43	36.03	2237.1	0.01	1.39	0	0	0.03	0.02	0.01	0.01	0.01	0.01	0	0
52876	102.85	36.32	1813.9	0.07	4.34	0	0.01	0.07	0.07	0.12	0.18	0.09	0	0	0
52889	103.88	36.05	1517.2	0.05	3.69	0	0	0.02	0.08	0.13	0.12	0.07	0	0	0
52895	104.68	36.57	1398.2	0.05	3.48	0	0	0.01	0.11	0.14	0.12	0.04	0	0	0
52908	93.08	35.22	4612.2	0.2	5.72	0.25	0.2	0.08	0.09	0.11	0.14	0.17	0.25	0.44	0.21
52943	99.98	35.58	3323.2	0.08	4.77	0	0.07	0.09	0.06	0.11	0.05	0.13	0.15	0.03	0
52957	100.65	35.27	3289.4	0.21	7.48	0.01	0.23	0.3	0.17	0.33	0.25	0.35	0.32	0.12	0
52968	101.47	35.03	3662.8	0.47	12.05	0.1	0.65	1.02	0.15	0.19	0.74	0.73	0.89	0.5	0.03
52983	104.15	35.87	1874.4	0.12	5.86	0	0.01	0.09	0.11	0.28	0.4	0.21	0.06	0	0
52984	103.18	35.58	1917.2	0.17	6.79	0	0.02	0.12	0.21	0.49	0.54	0.41	0.06	0	0
52986	103.85	35.35	1893.8	0.16	7.28	0	0.02	0.13	0.2	0.65	0.3	0.27	0.07	0	0
52993	105.08	35.68	2012.2	0.38	8.63	0	0.06	0.24	0.64	1.51	1.28	0.5	0.1	0	0
52996	105	35.38	2450.6	0.47	8.25	0	0.2	0.48	0.37	1.53	1.35	0.95	0.36	0.03	0
53068	111.97	43.65	964.7	0.27	4.11	0	0.04	0.32	1.02	0.92	0.38	0.12	0.04	0	0
53083	114.15	44.62	1181.6	1.1	7.31	0	0.11	1.24	3.05	4.47	3.54	1.38	0.08	0	0
53149	110.13	42.53	1225.2	0.12	3.96	0	0.03	0.24	0.22	0.27	0.22	0.09	0.02	0	0
53192	114.95	44.02	1126.1	1.11	7.7	0	0.11	1.17	3.42	5.27	4.64	1.04	0.08	0.01	0
53195	113.63	43.87	1036.7	0.96	7.21	0	0.09	0.98	2.65	3.87	2.7	0.77	0.06	0.01	0
53231	106.4	41.4	1509.6	0.16	4.34	0	0.03	0.2	0.54	0.65	0.23	0.07	0.02	0	0
53276	112.9	42.4	1150.8	0.15	3.96	0	0.03	0.34	0.37	0.35	0.34	0.1	0.01	0.01	0
53336	108.52	41.57	1288	0.11	3.83	0	0.01	0.08	0.15	0.44	0.36	0.07	0	0	0
53352	110.43	41.7	1376.6	0.24	5.69	0	0.06	0.51	0.74	0.61	0.58	0.23	0.01	0	0
53362	111.68	41.53	1490.1	0.49	7.14	0	0.12	0.68	1.3	1.66	1.02	0.41	0.08	0.01	0
53391	114	41.9	1482.7	0.26	5.61	0	0.09	0.55	0.72	0.64	0.59	0.43	0.09	0.02	0
53399	114.7	41.15	1393.3	0.26	6.75	0	0.09	0.32	0.33	0.55	0.57	0.48	0.14	0.02	0
53446	109.85	40.67	1067.2	0.1	5.72	0	0	0.01	0.15	0.39	0.32	0.1	0	0	0
53463	111.68	40.82	1063	0.15	6.31	0	0	0.08	0.24	0.54	0.53	0.16	0	0	0
53478	112.45	40	1345.8	0.28	6.46	0	0.01	0.27	0.41	0.81	0.64	0.44	0.07	0.01	0
53480	113.07	41.03	1419.3	0.18	6.76	0	0.03	0.31	0.22	0.26	0.31	0.27	0.14	0.02	0
53487	113.33	40.1	1067.2	0.17	5.14	0	0	0.1	0.3	0.45	0.42	0.22	0.01	0	0
53502	105.75	39.78	1031.8	0.02	2.07	0	0	0.01	0.05	0.04	0.04	0.02	0	0	0
53513	107.42	40.75	1039.3	0.03	3.24	0	0	0.01	0.06	0.1	0.09	0.06	0	0	0
53519	106.77	39.22	1092.5	0.02	2.28	0	0	0.01	0.03	0.02	0.03	0.02	0	0	0
53529	107.98	39.1	1380.3	0.08	4.03	0	0	0.04	0.14	0.19	0.25	0.1	0.01	0	0
53543	109.98	39.83	1461.9	0.22	6.72	0	0.01	0.1	0.31	0.53	0.82	0.43	0.02	0	0
53545	109.73	39.57	1329.3	0.12	5.29	0	0.01	0.07	0.15	0.15	0.49	0.27	0	0	0
53564	111.15	39.38	861.5	0.2	5.32	0	0	0.05	0.31	0.99	0.67	0.06	0	0	0
53593	114.57	39.83	909.5	0.17	6.07	0	0.01	0.21	0.39	0.31	0.42	0.16	0.06	0	0
53602	105.67	38.83	1561.4	0.11	4.18	0	0.02	0.15	0.36	0.23	0.23	0.09	0.01	0	0
53614	106.22	38.48	1111.4	0.05	3.28	0	0	0.01	0.09	0.07	0.14	0.04	0	0	0
53615	106.7	38.8	1101.6	0.02	2.04	0	0	0	0.05	0.06	0.06	0.02	0	0	0
53646	109.78	38.27	1157	0.14	4.86	0	0	0.02	0.3	0.61	0.28	0.07	0	0	0
53663	111.82	38.92	1401	0.39	8.41	0	0.04	0.3	1.16	1.47	1.01	0.35	0.05	0	0
53664	111.13	38.47	1012.6	0.19	6.68	0	0	0.09	0.65	0.61	0.29	0.11	0.01	0	0
53673	112.72	38.73	828.2	0.12	6.07	0	0	0.03	0.14	0.42	0.18	0.13	0	0	0
53698	114.42	38.03	81	0.1	6.18	0	0	0.01	0.28	0.36	0.34	0.02	0	0	0
53704	105.18	37.53	1225.7	0.06	2.94	0	0	0.02	0.14	0.12	0.15	0.03	0	0	0
53705	105.68	37.48	1183.4	0.03	2.96	0	0	0.01	0.03	0.08	0.07	0.02	0	0	0
53723	107.38	37.8	1349.3	0.11	5.79	0	0.01	0.07	0.12	0.27	0.26	0.07	0.01	0	0
53738	108.17	36.92	1331.4	0.16	5.97	0	0.01	0.04	0.23	0.5	0.43	0.19	0.01	0	0
53740	109.23	37.93	1111	0.11	5.24	0	0	0.03	0.22	0.37	0.37	0.09	0	0	0
53754	110.22	37.5	929.7	0.23	7.45	0	0	0.05	0.34	0.8	0.38	0.14	0	0	0
53764	111.1	37.5	950.8	0.19	7.17	0	0	0.09	0.5	0.52	0.47	0.12	0.01	0	0
53772	112.55	37.78	778.3	0.15	7.97	0	0	0.07	0.31	0.4	0.21	0.11	0	0	0
53782	113.55	37.85	741.9	0.18	9.27	0	0.01	0.08	0.42	0.41	0.42	0.21	0.01	0	0
53787	112.98	37.07	1041.4	0.37	8.82	0	0	0.14	1.24	1.55	1.12	0.32	0.01	0	0
53798	114.5	37.07	77.3	0.08	5.57	0	0	0.05	0.21	0.4	0.22	0.03	0	0	0
53806	105.65	36.57	1854.2	0.22	8.39	0	0.08	0.16	0.19	0.53	0.57	0.31	0.11	0.01	0
53810	105.9	36.97	1339.3	0.09	4.18	0	0	0.02	0.07	0.22	0.23	0.06	0	0	0
53817	106.27	36	1753	0.23	7.48	0	0.05	0.22	0.16	0.47	0.53	0.36	0.09	0	0
53821	107.3	36.58	1255.6	0.13	5.68	0	0.01	0.06	0.17	0.47	0.41	0.13	0.01	0	0
53845	109.5	36.6	958.5	0.12	7.03	0	0	0.06	0.33	0.43	0.28	0.12	0.01	0	0
53853	110.95	36.7	1052.7	0.31	8.62	0	0.01	0.13	0.82	1.17	0.6	0.28	0.01	0	0
53863	111.92	37.03	743.9	0.13	7	0	0	0.07	0.36	0.42	0.35	0.11	0.01	0	0
53868	111.5	36.07	449.5	0.08	5.9	0	0	0.01	0.17	0.37	0.22	0.02	0	0	0
53898	114.4	36.05	62.9	0.1	7.69	0	0	0.03	0.19	0.42	0.19	0.05	0	0	0
53903	105.72	35.97	1916.5	0.15	5.97	0	0.02	0.12	0.16	0.35	0.34	0.22	0.05	0	0
53915	106.67	35.55	1346.6	0.13	6.1	0	0.01	0.07	0.23	0.35	0.23	0.16	0.01	0	0
53923	107.63	35.73	1421	0.34	10.31	0	0.01	0.17	0.4	1	1.05	0.56	0.02	0	0
53929	107.8	35.2	1206.5	0.35	10.79	0	0	0.16	0.49	1.28	1.03	0.4	0.02	0	0
53942	109.5	35.82	1159.8	0.3	10.4	0	0	0.16	0.62	1	0.92	0.43	0.01	0	0
53947	109.07	35.08	978.9	0.18	8.32	0	0	0.08	0.28	0.59	0.44	0.29	0	0	0
53959	111.05	35.05	365	0.04	4	0	0	0	0.08	0.23	0.08	0.03	0	0	0
53975	112.4	35.48	659.5	0.25	10.17	0	0	0.12	0.24	1.02	0.86	0.2	0.01	0	0
53986	113.88	35.32	73.2	0.06	5.62	0	0	0.03	0.12	0.28	0.1	0.03	0	0	0
54012	117.6	44.58	1000.6	1.23	11.76	0	0.28	2.1	3.71	3.96	3.09	1.68	0.38	0.05	0
54026	120.9	44.57	265	0.1	5.48	0	0.03	0.21	0.15	0.24	0.15	0.19	0.01	0	0
54027	119.4	43.98	486.2	0.21	8.21	0	0.05	0.47	0.3	0.26	0.23	0.32	0.08	0	0
54041	123.07	44.78	149.5	0.2	5.82	0	0.02	0.32	0.62	0.69	0.39	0.31	0	0	0
54049	123.97	44.25	188.9	0.46	8.18	0	0.02	0.6	0.98	1.62	0.97	0.61	0.03	0	0
54063	126	44.97	196.8	0.86	8.18	0	0.05	0.78	2.27	3.3	2.72	0.82	0.03	0	0
54094	129.6	44.57	241.4	1.96	13.75	0	0.38	1.57	5.3	8.17	4.42	0.9	0.11	0	0
54096	131.17	44.38	567.8	1.59	16.56	0	0.54	2.19	5.64	4.68	3.55	1.61	0.27	0.01	0
54102	116.12	43.95	1003	0.83	9.43	0	0.1	0.98	2.48	3.33	2.04	0.72	0.17	0.01	0
54115	118.07	43.6	799.5	0.18	8.24	0	0.05	0.42	0.24	0.15	0.22	0.45	0.18	0	0
54134	121.28	43.6	241	0.22	7	0	0.01	0.38	0.45	0.69	0.35	0.28	0.03	0	0
54135	122.27	43.6	178.7	0.3	7.43	0	0.02	0.48	0.82	1.33	0.34	0.25	0.06	0	0
54142	123.53	43.5	114.9	0.24	7.62	0	0.02	0.47	0.74	1.08	0.26	0.23	0.04	0	0
54157	124.33	43.17	165.7	0.7	11.93	0	0.04	1.14	2.1	3.25	1.42	0.52	0.08	0	0
54161	125.22	43.9	236.8	0.91	10.86	0	0.15	1.42	2.34	3.87	2.13	0.74	0.08	0	0
54169	126.02	43.3	271.6	1.39	12.29	0	0.16	1.57	3.64	6.29	4.98	1	0.06	0	0
54172	126.47	43.95	183.4	1.21	12.17	0	0.2	1.3	2.77	5.65	4.17	1	0.04	0	0
54181	127.33	43.7	295	2.73	18.48	0	0.18	2.55	7.49	10.89	9.29	1.72	0.1	0	0
54186	128.2	43.37	524.9	1.26	14.27	0	0.21	1.88	4.11	4.22	3.08	0.93	0.33	0.02	0
54208	116.47	42.18	1245.4	0.49	7.68	0	0.09	0.76	1.08	1.38	1.07	0.59	0.11	0.01	0
54213	119.02	42.93	634.3	0.2	8.11	0	0.04	0.41	0.27	0.2	0.16	0.37	0.14	0	0
54218	118.93	42.27	568	0.15	6.25	0	0.02	0.26	0.32	0.24	0.19	0.21	0.06	0	0
54226	120.7	42.33	400.5	0.11	5.71	0	0	0.19	0.33	0.16	0.17	0.23	0.07	0	0
54236	122.53	42.42	79.4	0.19	7.21	0	0	0.31	0.44	0.53	0.22	0.21	0.04	0	0
54237	121.72	42.08	167.8	0.16	5.75	0	0	0.22	0.52	0.44	0.31	0.18	0.04	0	0
54254	124.05	42.53	98.2	0.64	10.18	0	0.03	0.74	1.79	2.77	1.4	0.4	0.06	0	0
54259	124.92	42.1	237.2	1.44	14.43	0	0.02	1.41	4	6.72	4.41	0.68	0.13	0	0
54266	125.63	42.53	340.5	1.29	13.97	0	0.06	1.68	3.65	4.96	3.84	0.87	0.21	0	0
54273	126.75	42.98	263.3	2.04	15.5	0	0.05	1.99	5.3	8.48	5.84	0.88	0.08	0	0
54276	126.82	42.35	549.2	3.05	18.31	0	0.22	2.83	8.24	10.41	9.06	2.22	0.39	0.01	0
54284	127.57	42.1	774.2	5.9	29.67	0	0.38	4.25	12.99	19.27	22.02	10.4	0.82	0.04	0
54285	128.25	42.53	591.4	2.16	16.86	0	0.23	1.81	6.26	7.59	6.51	2.41	0.28	0.01	0
54292	129.5	42.87	257.3	0.45	10.46	0	0.06	0.54	1.78	1.03	0.78	0.42	0.06	0	0
54308	116.63	41.22	661.2	0.11	5.43	0	0	0.28	0.16	0.16	0.2	0.11	0	0	0
54311	117.75	41.93	842.8	0.2	7.03	0	0.02	0.39	0.4	0.32	0.33	0.28	0.07	0	0
54324	120.45	41.55	169.9	0.11	4.75	0	0	0.18	0.24	0.26	0.07	0.09	0.02	0	0
54326	119.7	41.38	422	0.17	7.07	0	0	0.37	0.41	0.61	0.17	0.1	0.03	0	0
54335	122.08	41.68	37.5	0.15	6.21	0	0	0.21	0.4	0.4	0.29	0.17	0.04	0	0
54337	121.12	41.13	65.9	0.14	6.86	0	0	0.18	0.26	0.68	0.33	0.06	0.02	0	0
54339	123	41.08	77.3	0.38	13.03	0	0.01	0.46	0.98	1.27	0.87	0.36	0.02	0	0
54342	123.52	41.73	49	0.49	12.03	0	0.01	0.53	1.71	1.93	1.08	0.36	0.03	0	0
54346	123.78	41.32	185.4	0.81	14.72	0	0.03	0.78	2.17	3.2	1.87	0.68	0.09	0	0
54351	124.08	41.92	118.5	1.01	14.34	0	0.01	0.77	2.62	4.66	2.43	0.46	0.08	0	0
54363	125.9	41.68	402.9	1.24	13.89	0	0.03	1.37	2.97	5.26	2.87	0.69	0.14	0	0
54365	125.35	41.28	245.5	0.79	10.67	0	0.01	0.68	2.43	3.63	2.24	0.49	0.04	0	0
54374	126.92	41.8	332.7	1.93	17.64	0	0.04	1.55	6.07	9.46	4.21	0.59	0.06	0	0
54377	126.15	41.1	177.7	2.04	17.31	0	0.01	0.92	5.72	10.62	5.39	0.58	0.01	0	0
54386	128.18	41.42	775	4.16	23.1	0.01	0.18	3.13	10.09	14.44	12.79	5.05	0.8	0.02	0
54401	114.88	40.78	724.2	0.1	5.24	0	0	0.09	0.22	0.26	0.23	0.13	0.01	0	0
54405	115.5	40.4	536.8	0.07	4.1	0	0	0.05	0.15	0.17	0.16	0.06	0	0	0
54423	117.95	40.98	385.9	0.18	8.34	0	0	0.26	0.56	0.57	0.41	0.12	0.01	0	0
54429	117.95	40.2	54.9	0.15	4.81	0	0	0.03	0.17	0.9	0.19	0.03	0	0	0
54436	118.95	40.4	227.5	0.16	5.86	0	0	0.16	0.28	0.51	0.26	0.07	0	0	0
54449	119.52	39.85	2.4	0.07	5.24	0	0	0.05	0.08	0.34	0.1	0.03	0	0	0
54454	120.35	40.35	15.3	0.16	6.83	0	0	0.2	0.23	0.5	0.25	0.08	0	0	0
54455	120.7	40.58	10.5	0.12	5.9	0	0	0.1	0.18	0.56	0.25	0.07	0	0	0
54471	122.17	40.65	3.8	0.36	10.69	0	0	0.31	0.7	1.65	0.7	0.23	0	0	0
54476	122.15	40.17	20.4	0.27	8.52	0	0	0.24	0.68	1.07	0.68	0.13	0.01	0	0
54483	123.9	40.88	233.4	0.62	11.21	0	0.02	0.48	1.36	2.35	1.87	0.49	0.06	0	0
54486	123.28	40.28	79.8	0.33	11.48	0	0	0.18	0.92	1.71	0.78	0.19	0.01	0	0
54493	124.78	40.72	260.1	0.66	13.43	0	0	0.26	1.73	3.48	1.7	0.51	0.03	0	0
54497	124.33	40.05	13.8	0.2	9.36	0	0	0.07	0.61	0.87	0.56	0.18	0.01	0	0
54511	116.47	39.8	31.3	0.06	4.39	0	0	0.05	0.08	0.24	0.17	0.02	0	0	0
54518	116.38	39.12	9	0.08	4.64	0	0	0.05	0.15	0.55	0.2	0.02	0	0	0
54527	117.07	39.08	2.5	0.06	3.81	0	0	0.03	0.1	0.27	0.1	0.01	0	0	0
54534	118.15	39.67	27.8	0.09	5	0	0	0.06	0.08	0.54	0.2	0.03	0	0	0
54539	118.88	39.43	10.5	0.1	4.96	0	0	0.06	0.12	0.33	0.21	0.06	0	0	0
54563	122.02	39.63	118.7	0.09	5.54	0	0	0.05	0.15	0.45	0.15	0.07	0	0	0
54575	122.37	39.42	43.2	0.12	5.57	0	0	0.03	0.14	0.62	0.27	0.06	0	0	0
54584	122.95	39.72	34.8	0.17	6.48	0	0.01	0.04	0.22	0.95	0.46	0.1	0	0	0
54602	115.52	38.85	17.2	0.09	4.61	0	0	0.03	0.15	0.34	0.23	0.01	0	0	0
54606	115.73	38.23	19	0.12	6.21	0	0	0.03	0.28	0.4	0.48	0.02	0	0	0
54616	116.83	38.33	9.6	0.07	4.83	0	0	0.02	0.19	0.24	0.21	0.02	0	0	0
54623	117.72	39.05	4.8	0.07	4.57	0	0	0.03	0.14	0.32	0.13	0.01	0	0	0
54624	117.35	38.37	6.6	0.09	4.72	0	0	0.04	0.17	0.5	0.15	0.02	0	0	0
54662	121.63	38.9	91.5	0.08	6.04	0	0	0.07	0.11	0.53	0.11	0.05	0	0	0
54705	115.38	37.37	27.4	0.12	5.55	0	0	0.02	0.23	0.55	0.33	0.02	0	0	0
54714	116.32	37.43	21.2	0.09	5.5	0	0	0.02	0.18	0.3	0.26	0.01	0	0	0
54725	117.53	37.48	11.7	0.09	5.21	0	0	0.02	0.15	0.38	0.31	0.02	0	0	0
54736	118.67	37.43	6	0.06	4.34	0	0	0	0.1	0.29	0.14	0.01	0	0	0
54751	120.72	37.93	39.7	0.1	6.79	0	0	0.03	0.33	0.36	0.22	0.03	0	0	0
54753	120.32	37.62	4.8	0.1	5.93	0	0	0.03	0.3	0.48	0.28	0.04	0	0	0
54765	121.4	37.53	46.7	0.29	11.9	0	0	0.17	1.36	0.9	0.55	0.07	0	0	0
54774	122.13	37.47	65.4	0.16	8.86	0	0	0.1	0.72	0.68	0.14	0.02	0	0	0
54776	122.68	37.4	47.7	0.11	6.71	0	0	0.06	0.44	0.32	0.12	0.01	0	0	0
54808	115.67	36.23	37.8	0.08	5.79	0	0	0.02	0.13	0.43	0.17	0.01	0	0	0
54823	117.05	36.6	170.3	0.08	6.69	0	0	0.03	0.14	0.34	0.23	0.01	0	0	0
54826	117.1	36.25	1533.7	0.36	10.96	0	0.01	0.26	0.79	1.11	0.9	0.95	0.07	0	0
54827	117.15	36.17	128.8	0.07	4.95	0	0	0	0.16	0.27	0.23	0.03	0	0	0
54830	118	36.83	34	0.12	8.74	0	0	0.04	0.22	0.48	0.43	0.08	0	0	0
54836	118.15	36.18	305.1	0.11	7.1	0	0	0	0.19	0.48	0.29	0.05	0	0	0
54843	119.18	36.75	22.2	0.1	6.46	0	0	0	0.16	0.46	0.3	0.02	0	0	0
54852	120.73	36.97	54.4	0.05	4.24	0	0	0.01	0.13	0.24	0.08	0.02	0	0	0
54857	120.33	36.07	76	0.04	4.14	0	0	0	0.07	0.18	0.07	0.01	0	0	0
54863	121.18	36.77	40.9	0.03	3.45	0	0	0.01	0.09	0.13	0.05	0.01	0	0	0
54871	122.43	36.92	4.8	0.05	3.96	0	0	0.03	0.17	0.14	0.09	0.01	0	0	0
54906	115.43	35.25	49.7	0.07	5.22	0	0	0.01	0.11	0.32	0.18	0.02	0	0	0
54916	116.85	35.57	51.7	0.06	5.03	0	0	0	0.08	0.26	0.17	0.02	0	0	0
54936	118.83	35.58	107.4	0.07	5	0	0	0.01	0.16	0.5	0.15	0.03	0	0	0
54938	118.35	35.05	87.9	0.05	4.42	0	0	0	0.09	0.25	0.17	0.02	0	0	0
54945	119.53	35.43	36.9	0.02	2.46	0	0	0	0.02	0.11	0.09	0	0	0	0
55228	80.08	32.5	4278.6	0.09	3.29	0	0.02	0.07	0.25	0.2	0.1	0.06	0.01	0	0
55248	84.42	32.15	4414.9	0.09	4.46	0.03	0.05	0.07	0.1	0.11	0.05	0.03	0.05	0.09	0.05
55279	90.02	31.38	4700	0.21	8.4	0.14	0.3	0.2	0.22	0.22	0.28	0.18	0.25	0.26	0.08
55294	91.1	32.35	4800	0.27	7.52	0.11	0.39	0.35	0.43	0.54	0.41	0.13	0.28	0.33	0.12
55299	92.07	31.48	4507	0.3	8.79	0.06	0.38	0.39	0.5	0.51	0.42	0.24	0.37	0.27	0.05
55437	81.25	30.28	4900	0.99	17.27	0	0.05	0.05	0.98	2.09	3.28	2.43	0.44	0.05	0
55472	88.63	30.95	4672	0.09	5.24	0.05	0.11	0.04	0.1	0.11	0.08	0.06	0.11	0.14	0.04
55493	91.1	30.48	4200	0.16	6.17	0	0.12	0.1	0.35	0.49	0.11	0.12	0.23	0.14	0.01
55578	88.88	29.25	3836	0.01	1.59	0	0	0.01	0	0	0	0.01	0.01	0	0
55585	90.17	29.43	3809.4	0.01	2.46	0	0.01	0.01	0	0	0.01	0.04	0.03	0.01	0
55591	91.13	29.67	3648.9	0.02	3.21	0	0	0.01	0.02	0.02	0.03	0.05	0.01	0	0
55598	91.77	29.25	3551.7	0.01	2.29	0	0	0.01	0	0	0.01	0.07	0.02	0	0
55655	85.97	28.18	3810	4.01	51.17	0	0.22	0.37	3.73	12.98	15.25	9	1.34	0.08	0
55664	87.08	28.63	4300	0.02	3.14	0	0.02	0	0.02	0.02	0.02	0.01	0.03	0.01	0
55680	89.6	28.92	4040	0.01	2.38	0	0	0.01	0	0	0.01	0.02	0.04	0.01	0
55690	91.95	27.98	4280.3	1.3	18.46	0	0.2	0.63	1.37	3.77	2.86	3.34	1.38	0.13	0
55696	92.47	28.42	3860	0.02	2.69	0	0	0.01	0.06	0	0.01	0.01	0.04	0	0
55773	89.08	27.73	4300	0.7	20.61	0.01	0.51	0.53	0.55	0.85	1.04	1.81	0.92	0.2	0
56004	92.43	34.22	4533.1	0.2	6.21	0.09	0.37	0.33	0.36	0.28	0.24	0.12	0.19	0.23	0.08
56016	95.6	33.85	4179	0.17	7.16	0.09	0.35	0.28	0.16	0.16	0.14	0.24	0.31	0.26	0.01
56018	95.3	32.9	4066.4	0.44	8.66	0	0.22	0.29	0.72	1.86	0.77	0.32	0.3	0.18	0.02
56021	95.78	34.13	4175	0.28	7.04	0.12	0.38	0.33	0.27	0.4	0.24	0.3	0.33	0.34	0.1
56029	97.02	33.02	3681.2	0.14	6.5	0	0.09	0.15	0.12	0.29	0.15	0.23	0.21	0.05	0
56033	98.22	34.92	4272.3	0.36	6.5	0.11	0.52	0.43	0.34	0.64	0.56	0.46	0.3	0.31	0.08
56034	97.13	33.8	4415.4	1.15	12.14	0.41	1.47	1.2	2	2.15	1.58	1.12	0.87	1.18	0.41
56038	98.1	32.98	4200	0.73	11.41	0.14	0.82	0.4	0.89	1.11	1	0.98	0.96	0.73	0.12
56041	99.2	34.27	4211.1	0.9	10.48	0.16	1.02	0.92	0.87	1.63	1.32	1.5	1.05	0.63	0.12
56046	99.65	33.75	3967.5	0.59	9.21	0.13	0.6	0.51	0.54	0.9	0.88	1.13	0.88	0.51	0.05
56065	101.6	34.73	3500	0.35	8.83	0.02	0.28	0.27	0.14	0.45	0.7	0.69	0.63	0.24	0.01
56067	101.48	33.43	3628.5	0.57	11.03	0.04	0.53	0.69	0.49	0.7	0.79	1.38	1.36	0.37	0.01
56074	102.08	34	3471.4	0.3	7.32	0.01	0.27	0.27	0.22	0.43	0.51	0.63	0.49	0.12	0
56079	102.97	33.58	3439.6	0.48	9.86	0.06	0.45	0.52	0.46	0.68	0.75	0.9	0.94	0.28	0
56080	102.9	35	2910	0.27	8.25	0	0.24	0.32	0.17	0.35	0.41	0.79	0.44	0.1	0
56093	104.02	34.43	2315	0.13	6.11	0	0.09	0.12	0.08	0.15	0.29	0.41	0.18	0.02	0
56106	93.78	31.88	4022.8	0.38	8.41	0	0.23	0.29	0.74	1.13	1.05	0.45	0.34	0.12	0
56116	95.6	31.42	3873.1	0.27	8.5	0	0.28	0.26	0.24	0.19	0.51	0.49	0.43	0.1	0
56125	96.48	32.2	3643.7	0.12	6.76	0	0.06	0.09	0.13	0.16	0.33	0.18	0.16	0.02	0
56137	97.17	31.15	3306	0.05	4.97	0	0	0.07	0.08	0.03	0.08	0.15	0.02	0	0
56144	98.58	31.8	3184	0.05	5	0	0.01	0.06	0.04	0.03	0.12	0.16	0.04	0	0
56146	100	31.62	3393.5	0.22	8.26	0	0.07	0.21	0.38	0.41	0.53	0.46	0.22	0.01	0
56151	100.75	32.93	3530	0.27	8.25	0	0.19	0.28	0.35	0.45	0.42	0.71	0.45	0.08	0
56152	100.33	32.28	3893.9	0.54	11.04	0.07	0.61	0.49	0.81	0.52	0.83	0.93	0.79	0.33	0.03
56167	101.12	30.98	2957.2	0.03	4.04	0	0	0.02	0.03	0.05	0.09	0.08	0.01	0	0
56171	101.7	32.9	3275.1	0.33	9.42	0	0.16	0.38	0.54	0.44	0.79	0.67	0.39	0.06	0
56172	102.23	31.9	2664.4	0.06	6.66	0	0	0.02	0.08	0.08	0.2	0.15	0.03	0	0
56173	102.55	32.8	3491.6	0.68	13.17	0.09	0.51	0.81	0.74	0.93	1	1.44	1.16	0.36	0.03
56178	102.35	31	2369.2	0.02	2.75	0	0	0	0.01	0.03	0.08	0.05	0	0	0
56182	103.57	32.65	2850.7	0.24	8.32	0	0.02	0.35	0.22	0.37	0.59	0.71	0.22	0	0
56202	93.28	30.67	4488.8	1.22	18.45	0.29	0.97	0.9	1.12	2.21	2.58	1.47	1.7	1.63	0.32
56227	95.77	29.87	2736	0.06	5.93	0	0	0.01	0.1	0.12	0.21	0.13	0.01	0	0
56251	100.32	30.93	3000	0.03	3.8	0	0	0.04	0.04	0.03	0.08	0.08	0.01	0	0
56257	100.27	30	3948.9	0.19	10.45	0.04	0.25	0.17	0.38	0.14	0.21	0.4	0.48	0.13	0
56312	94.33	29.67	2991.8	0.03	3.25	0	0	0.02	0.02	0.06	0.12	0.11	0	0	0
56331	97.83	29.67	3780	0.05	4.41	0	0.01	0.12	0.04	0.03	0.08	0.15	0.09	0	0
56357	100.3	29.05	3727.7	0.08	6.07	0.01	0.1	0.11	0.06	0.05	0.05	0.16	0.19	0.04	0
56374	101.97	30.05	2615.7	0.27	12.62	0	0.08	0.24	0.28	0.32	0.9	0.91	0.28	0.02	0
56385	103.33	29.52	3047.4	0.71	16.23	0	0.16	0.88	1	1.08	1.89	1.8	0.75	0.06	0
56434	97.47	28.65	2327.6	0.04	5.46	0	0	0	0	0.04	0.06	0.15	0.06	0	0
56444	98.92	28.48	3319	0.61	20.72	0	0.05	0.5	0.25	0.65	1.31	1.86	1.17	0	0
56462	101.5	29	2987.3	0.03	4.34	0	0	0.01	0.05	0.05	0.06	0.07	0.01	0	0
56475	102.52	28.65	1659.5	0.02	3.61	0	0	0	0.01	0.07	0.08	0.01	0	0	0
56479	102.85	28	2132.4	0.11	9.14	0	0	0.03	0.26	0.32	0.32	0.13	0.01	0	0
56485	103.58	28.27	1255.8	0.04	5	0	0	0	0.05	0.16	0.15	0.01	0	0	0
56543	99.7	27.83	3276.7	0.29	14.93	0	0.01	0.19	0.26	0.75	0.86	0.77	0.16	0	0
56548	99.28	27.17	2326.1	0.08	10.79	0	0	0.02	0.04	0.2	0.31	0.09	0	0	0
56586	103.72	27.35	1949.5	0.06	6.9	0	0	0.01	0.06	0.3	0.12	0.06	0	0	0
56684	103.28	26.42	2110.5	0.06	6.25	0	0	0	0.05	0.23	0.13	0.02	0	0	0
56691	104.28	26.87	2237.5	0.08	7.1	0	0	0.03	0.07	0.32	0.18	0.06	0	0	0
56793	104.47	25.72	1800	0.02	3.71	0	0	0	0.01	0.09	0.02	0	0	0	0
57006	105.75	34.58	1141.7	0.06	4.96	0	0	0.01	0.1	0.25	0.15	0.08	0.01	0	0
57016	107.13	34.35	612.4	0.06	5.79	0	0	0	0.08	0.32	0.2	0.02	0	0	0
57034	108.22	34.25	447.8	0.07	6.31	0	0	0.02	0.09	0.27	0.27	0.07	0	0	0
57036	108.93	34.3	397.5	0.08	5.86	0	0	0.02	0.12	0.42	0.19	0.06	0	0	0
57046	110.08	34.48	2064.9	1.27	21.95	0	0.31	1.69	1.9	3.05	2.53	3.44	0.8	0.03	0
57051	111.2	34.8	409.9	0.06	6.48	0	0	0.01	0.1	0.32	0.17	0.06	0	0	0
57067	111.03	34.05	568.8	0.11	8.62	0	0	0.02	0.16	0.42	0.28	0.14	0.01	0	0
57071	112.43	34.82	333.3	0.16	10.69	0	0	0.07	0.25	0.57	0.38	0.15	0	0	0
57073	112.47	34.63	137.1	0.08	7.32	0	0	0	0.3	0.32	0.28	0.05	0	0	0
57077	111.6	33.78	750.3	0.2	10.97	0	0	0.06	0.24	0.91	0.45	0.24	0.03	0	0
57083	113.65	34.72	110.4	0.13	8.9	0	0	0.03	0.19	0.51	0.25	0.08	0	0	0
57089	113.87	34.03	66.8	0.12	7.93	0	0	0.02	0.26	0.42	0.27	0.06	0	0	0
57091	114.3	34.78	73.7	0.1	8.4	0	0	0.03	0.14	0.42	0.2	0.06	0	0	0
57106	106.15	33.32	794.2	0.02	3.04	0	0	0	0.01	0.07	0.06	0.02	0	0	0
57127	107.03	33.07	509.5	0.02	3.43	0	0	0	0.01	0.09	0.04	0.01	0	0	0
57134	107.98	33.52	827.2	0.07	5.14	0	0	0.03	0.05	0.25	0.23	0.08	0	0	0
57143	109.97	33.87	742.2	0.09	7.04	0	0	0.06	0.1	0.36	0.21	0.1	0.01	0	0
57144	109.15	33.43	693.7	0.04	4.32	0	0	0.03	0.04	0.14	0.09	0.07	0	0	0
57156	111.5	33.3	250.3	0.07	7.66	0	0	0	0.1	0.27	0.18	0.02	0	0	0
57178	112.58	33.03	129.2	0.08	6.5	0	0	0	0.13	0.32	0.24	0.04	0	0	0
57181	113.05	33.88	136.4	0.1	7.96	0	0	0.02	0.14	0.6	0.29	0.06	0	0	0
57193	114.52	33.78	52.6	0.13	8.67	0	0	0.01	0.18	0.64	0.33	0.05	0	0	0
57232	108.27	33.05	484.9	0.02	3.44	0	0	0	0	0.11	0.03	0.02	0	0	0
57245	109.03	32.72	290.8	0.01	2.28	0	0	0	0	0.03	0.02	0.01	0	0	0
57253	110.82	32.85	201.9	0.07	7.21	0	0	0	0.07	0.2	0.3	0.01	0	0	0
57259	110.77	32.03	426.9	0.06	5.69	0	0	0	0.07	0.22	0.21	0.05	0	0	0
57265	111.67	32.38	90	0.09	7.36	0	0	0	0.06	0.37	0.26	0.01	0	0	0
57279	112.75	32.15	125.5	0.06	6.03	0	0	0	0.09	0.27	0.23	0.02	0	0	0
57290	114.02	33	82.7	0.16	10.66	0	0	0.02	0.2	0.73	0.58	0.05	0	0	0
57297	114.05	32.13	114.5	0.16	9.29	0	0	0	0.1	0.75	0.51	0.05	0	0	0
57378	112.57	31.17	65.8	0.07	6.45	0	0	0	0.06	0.37	0.15	0.01	0	0	0
57385	113.82	31.62	93.3	0.04	4.43	0	0	0	0.03	0.17	0.1	0.01	0	0	0
57399	115.02	31.18	59.3	0.04	5.07	0	0	0	0.03	0.16	0.17	0	0	0	0
57451	110.23	30.78	1819.3	1.42	19.81	0	0	0.26	1.5	5.63	5.68	2.38	0.15	0	0
57458	110.67	30.2	619.9	0.1	8.25	0	0	0	0.12	0.59	0.4	0.06	0	0	0
57461	111.3	30.7	133.1	0.03	4.83	0	0	0	0.02	0.21	0.07	0	0	0	0
57476	112.15	30.35	32.2	0.04	5.9	0	0	0	0.03	0.24	0.18	0	0	0	0
57483	113.17	30.67	34.1	0.05	5.41	0	0	0	0.03	0.24	0.15	0	0	0	0
57494	114.13	30.62	23.1	0.06	5.96	0	0	0	0.02	0.36	0.15	0	0	0	0
57545	109.42	29.52	459.5	0.02	3.41	0	0	0	0.03	0.13	0.07	0	0	0	0
57554	110.17	29.4	322.2	0.04	5.89	0	0	0	0.05	0.28	0.1	0	0	0	0
57562	111.37	29.58	116.9	0.04	4.82	0	0	0	0.02	0.24	0.14	0	0	0	0
57574	112.4	29.37	36	0.05	5.79	0	0	0	0.03	0.29	0.17	0	0	0	0
57583	113.92	29.98	36	0.05	5.19	0	0	0	0.01	0.31	0.15	0	0	0	0
57584	113.08	29.38	53	0.05	6.31	0	0	0	0.05	0.3	0.11	0	0	0	0
57598	114.58	29.03	146.8	0.06	8.69	0	0	0	0.08	0.34	0.23	0	0	0	0
57606	106.83	28.13	972	0.02	2.43	0	0	0	0.02	0.14	0.01	0	0	0	0
57614	106.22	28.33	1180.2	0.04	4.52	0	0	0	0.08	0.15	0.07	0.01	0	0	0
57622	107.15	28.95	1905.9	0.38	9.41	0	0	0.11	0.61	1.3	1.31	0.61	0.04	0	0
57633	108.77	28.83	664.1	0.04	4.69	0	0	0	0.03	0.25	0.1	0	0	0	0
57649	109.73	28.32	208.4	0.03	5.38	0	0	0	0.02	0.21	0.1	0	0	0	0
57655	110.4	28.47	151.6	0.03	4.39	0	0	0	0.02	0.17	0.1	0	0	0	0
57662	111.68	29.05	35	0.05	5.86	0	0	0	0.04	0.29	0.16	0.01	0	0	0
57669	111.22	28.38	128.3	0.08	9.32	0	0	0	0.05	0.47	0.3	0.01	0	0	0
57671	112.37	28.85	37	0.03	6.45	0	0	0	0.03	0.3	0.08	0	0	0	0
57682	113.57	28.72	106.3	0.03	4.96	0	0	0	0.03	0.19	0.13	0	0	0	0
57707	105.28	27.3	1510.6	0.04	4.86	0	0	0	0.03	0.23	0.05	0.01	0	0	0
57713	106.88	27.7	843.9	0.01	2.29	0	0	0	0	0.11	0.02	0	0	0	0
57722	107.47	27.77	792.2	0.02	3	0	0	0	0.01	0.13	0.05	0	0	0	0
57741	109.18	27.72	279.7	0.01	2.79	0	0	0	0.01	0.08	0.02	0	0	0	0
57745	109.68	27.45	272.2	0.03	3.81	0	0	0	0.05	0.14	0.06	0	0	0	0
57766	111.47	27.23	248.6	0.04	6.33	0	0	0	0	0.25	0.07	0	0	0	0
57774	112.17	27.45	100	0.05	7.28	0	0	0	0.01	0.25	0.14	0	0	0	0
57776	112.7	27.3	1265.9	0.33	12.21	0	0	0	0.27	1.89	1.55	0.14	0	0	0
57793	114.38	27.8	131.3	0.03	4.68	0	0	0	0.03	0.11	0.09	0	0	0	0
57803	106.02	27.03	1231.4	0.02	3.24	0	0	0	0.01	0.1	0.03	0	0	0	0
57806	105.9	26.25	1431.1	0.02	2.44	0	0	0	0.01	0.08	0.03	0	0	0	0
57816	106.73	26.58	1223.8	0.01	1.69	0	0	0	0.01	0.06	0.01	0	0	0	0
57825	107.98	26.6	720.3	0.02	3.04	0	0	0	0.02	0.11	0.04	0	0	0	0
57832	108.67	26.97	626.9	0.03	4.61	0	0	0	0.04	0.22	0.03	0	0	0	0
57853	110.63	26.73	341	0.03	4.5	0	0	0	0.01	0.18	0.07	0	0	0	0
57866	111.62	26.23	172.6	0.02	2.79	0	0	0	0	0.09	0.06	0	0	0	0
57872	112.6	26.9	104.9	0.03	4.28	0	0	0	0.01	0.13	0.08	0	0	0	0
57972	113.03	25.8	184.9	0.02	2.9	0	0	0	0.02	0.05	0.08	0	0	0	0
58005	115.67	34.45	50.1	0.11	7	0	0	0.04	0.14	0.45	0.27	0.02	0	0	0
58015	116.33	34.43	44.2	0.11	7.34	0	0	0.02	0.09	0.4	0.38	0.02	0	0	0
58027	117.15	34.28	41.2	0.1	8.27	0	0	0.01	0.05	0.38	0.36	0.01	0	0	0
58040	119.12	34.83	3.3	0.06	5.39	0	0	0	0.05	0.23	0.29	0.02	0	0	0
58102	115.77	33.87	37.7	0.09	6.79	0	0	0	0.13	0.47	0.36	0.02	0	0	0
58122	116.98	33.63	25.9	0.08	7.07	0	0	0	0.03	0.44	0.28	0.02	0	0	0
58138	118.52	32.98	40.8	0.06	8.03	0	0	0.01	0.02	0.36	0.2	0.03	0	0	0
58144	119.03	33.6	17.5	0.06	6.62	0	0	0.01	0.02	0.38	0.23	0.01	0	0	0
58150	120.25	33.77	2	0.02	3.36	0	0	0	0	0.09	0.09	0	0	0	0
58203	115.73	32.87	32.7	0.14	9.29	0	0	0.01	0.14	0.54	0.37	0.06	0	0	0
58208	115.62	32.17	42.9	0.14	9.52	0	0	0	0.08	0.55	0.36	0.04	0	0	0
58215	116.78	32.55	22.7	0.11	8.48	0	0	0	0.05	0.53	0.29	0.02	0	0	0
58221	117.38	32.92	21.9	0.11	9.48	0	0	0.01	0.04	0.62	0.23	0.04	0	0	0
58236	118.3	32.3	27.5	0.09	7.31	0	0	0	0.02	0.45	0.3	0.03	0	0	0
58238	118.8	32	7.1	0.05	5.31	0	0	0	0	0.28	0.17	0.02	0	0	0
58241	119.45	32.8	5.4	0.05	6.31	0	0	0	0	0.26	0.17	0.01	0	0	0
58251	120.32	32.87	4.3	0.03	4.38	0	0	0	0	0.15	0.11	0.01	0	0	0
58259	120.88	31.98	6.1	0.02	3.62	0	0	0	0.01	0.1	0.06	0	0	0	0
58265	121.6	32.07	5.5	0.01	1.86	0	0	0	0	0.03	0.05	0	0	0	0
58311	116.5	31.75	60.5	0.13	10.1	0	0	0	0.07	0.63	0.43	0.05	0	0	0
58314	116.32	31.4	86.4	0.15	11.62	0	0	0	0.05	0.79	0.43	0.05	0	0	0
58321	117.3	31.78	27	0.09	7.86	0	0	0	0.02	0.54	0.34	0.03	0	0	0
58326	117.87	31.62	22.4	0.08	6.71	0	0	0	0.02	0.38	0.2	0.02	0	0	0
58343	119.98	31.88	4.4	0.03	3.86	0	0	0	0.02	0.15	0.15	0.01	0	0	0
58345	119.48	31.43	7.7	0.05	6.1	0	0	0	0.02	0.33	0.19	0.01	0	0	0
58358	120.43	31.07	17.5	0.03	3.76	0	0	0	0	0.15	0.1	0	0	0	0
58402	115.67	30.73	123.8	0.03	3.68	0	0	0	0.01	0.12	0.13	0	0	0	0
58407	115.03	30.23	32.2	0.04	5.14	0	0	0	0.01	0.22	0.1	0	0	0	0
58424	117.05	30.53	19.8	0.04	4.36	0	0	0	0.01	0.23	0.1	0	0	0	0
58436	118.98	30.62	89.4	0.06	5.74	0	0	0	0.02	0.38	0.24	0.01	0	0	0
58437	118.15	30.13	1840.4	0.45	13.79	0	0	0.13	0.61	2.53	1.79	0.41	0.01	0	0
58445	119.42	30.35	1505.9	0.64	17	0	0	0.15	0.94	3.26	2.75	0.47	0.02	0	0
58457	120.17	30.23	41.7	0.06	6.96	0	0	0	0.04	0.31	0.23	0.01	0	0	0
58464	121.08	30.62	5.4	0.02	3.54	0	0	0	0.02	0.1	0.07	0	0	0	0
58506	115.98	29.58	1164.5	0.38	17.03	0	0	0.01	0.5	1.91	1.78	0.19	0	0	0
58519	116.68	29	40.1	0.04	5.72	0	0	0	0.05	0.14	0.19	0	0	0	0
58527	117.2	29.3	61.5	0.04	5.61	0	0	0	0.04	0.21	0.1	0	0	0	0
58531	118.28	29.72	142.7	0.05	6.93	0	0	0	0.02	0.26	0.18	0	0	0	0
58549	119.65	29.12	62.6	0.04	7.07	0	0	0	0.01	0.25	0.35	0	0	0	0
58556	120.82	29.6	104.3	0.05	6.64	0	0	0	0.06	0.3	0.25	0.01	0	0	0
58562	121.57	29.87	4.8	0.02	2.81	0	0	0	0.02	0.08	0.06	0	0	0	0
58606	115.92	28.6	46.9	0.03	4.54	0	0	0	0.03	0.09	0.17	0	0	0	0
58608	115.55	28.07	30.4	0.03	4.75	0	0	0	0.01	0.1	0.1	0	0	0	0
58626	117.22	28.3	51.2	0.03	4.21	0	0	0	0	0.05	0.08	0	0	0	0
58633	118.9	29	82.4	0.04	5.24	0	0	0	0.03	0.11	0.23	0	0	0	0
58634	118.25	28.68	116.3	0.03	4.97	0	0	0	0	0.07	0.26	0	0	0	0
58646	119.92	28.45	59.7	0.02	3.57	0	0	0	0.02	0.08	0.12	0	0	0	0
58653	120.92	28.82	1383.1	0.26	9.9	0	0	0.01	0.24	1.19	1.35	0.21	0	0	0
58726	117.83	27.95	1401.9	0.13	7.79	0	0	0.01	0.19	0.43	0.6	0.07	0.01	0	0

## Sheet: trend in snow depth
annual mean snow depth	longitude	latitude	slope(cm yr-1)	p≤0.05		annual maximum snow depth	lon	lat	slope	p≤0.05		october	lon	lat	slope	p≤0.05		november	lon	lat	slope	p≤0.05		december	lon	lat	slope	p≤0.05		january	lon	lat	slope	p≤0.05		february	lon	lat	slope	p≤0.05		march	lon	lat	slope	p≤0.05		april	lon
20069	76.98	79.5	0.127	0.04		20069	76.98	79.5	0.296	0.026		20069	76.98	79.5	0.152	0.016		20069	76.98	79.5	0.3	0.001		20069	76.98	79.5	0.27	0.002		20069	76.98	79.5	0.208	0.02		20046	58	80.6	0.36	0.041		20046	58	80.6	0.504	0.018		20046	58
20674	80.4	73.5	0.113	0.016		20674	80.4	73.5	0.365	0.004		21931	136.22	70.77	-0.117	0.013		20476	88.9	75.42	0.11	0.021		20087	90.62	79.55	0.198	0.033		20289	96.4	77.2	0.42	0.05		20069	76.98	79.5	0.32	0.003		20069	76.98	79.5	0.365	0.002		20069	76.98
20891	102.47	71.98	0.243	0		20891	102.47	71.98	0.685	0		22095	49.08	69.53	-0.054	0.046		20674	80.4	73.5	0.191	0.001		20674	80.4	73.5	0.254	0		20674	80.4	73.5	0.234	0		20674	80.4	73.5	0.211	0		20674	80.4	73.5	0.207	0.015		20289	96.4
20982	94.5	70.97	0.372	0.001		21647	143.23	73.18	0.499	0.002		22140	39.8	68.15	-0.043	0.043		20891	102.47	71.98	0.199	0.006		20891	102.47	71.98	0.214	0.019		20891	102.47	71.98	0.304	0.004		20891	102.47	71.98	0.522	0		20891	102.47	71.98	0.595	0		20674	80.4
21931	136.22	70.77	-0.195	0		21921	127.4	70.68	-0.376	0.03		22204	30.45	67.57	-0.076	0.007		21802	114.08	71.97	0.132	0.019		21802	114.08	71.97	0.221	0		21802	114.08	71.97	0.187	0.011		20982	94.5	70.97	0.553	0.008		20982	94.5	70.97	0.586	0.011		20891	102.47
22003	31.98	69.93	-0.329	0.001		21931	136.22	70.77	-0.325	0		22383	47.78	66.77	-0.109	0.022		21931	136.22	70.77	-0.144	0.022		21931	136.22	70.77	-0.167	0.045		21931	136.22	70.77	-0.257	0.003		21802	114.08	71.97	0.225	0.006		21931	136.22	70.77	-0.217	0.02		20982	94.5
22028	35.12	69.2	0.288	0		22003	31.98	69.93	-0.972	0		22408	31.17	65.22	-0.044	0.014		22140	39.8	68.15	-0.233	0.019		22140	39.8	68.15	-0.47	0		21946	147.88	70.62	-0.239	0.017		21931	136.22	70.77	-0.229	0.013		21946	147.88	70.62	-0.263	0.025		21647	143.23
22140	39.8	68.15	-0.521	0		22212	32.92	67.93	-0.905	0.006		22511	32.12	64.75	-0.166	0.005		22204	30.45	67.57	-0.263	0.002		22204	30.45	67.57	-0.327	0.004		22003	31.98	69.93	-0.582	0.003		21946	147.88	70.62	-0.299	0.007		22003	31.98	69.93	-0.902	0		21931	136.22
22204	30.45	67.57	-0.203	0.001		22217	32.35	67.15	0.41	0.002		22518	32.78	64.08	-0.168	0.046		22212	32.92	67.93	-0.507	0.006		22235	37.05	67.35	-0.231	0.012		22028	35.12	69.2	-0.533	0.022		22003	31.98	69.93	-0.789	0.001		22113	33.05	68.97	0.349	0.026		22003	31.98
22235	37.05	67.35	-0.137	0.005		22249	39.67	67.13	-0.302	0.011		22583	47.65	64.75	-0.067	0.013		22235	37.05	67.35	-0.193	0.01		22324	34.35	66.68	-0.252	0.011		22140	39.8	68.15	-0.849	0		22127	35.03	68	0.396	0.001		22127	35.03	68	0.44	0.001		22204	30.45
22249	39.67	67.13	-0.136	0.042		22271	44.13	67.88	0.636	0.004		22602	30.82	63.83	-0.049	0.002		22324	34.35	66.68	-0.147	0.029		22583	47.65	64.75	-0.241	0.014		22212	32.92	67.93	-0.647	0.018		22212	32.92	67.93	-0.758	0.012		22212	32.92	67.93	-0.756	0.011		22212	32.92
22271	44.13	67.88	0.179	0.019		22349	39.53	66.18	0.61	0.042		22676	45.63	63.58	-0.047	0.015		22656	41.8	63.48	0.217	0.01		22907	27	60.1	-0.173	0.033		22249	39.67	67.13	-0.265	0.031		22217	32.35	67.15	0.361	0.005		22217	32.35	67.15	0.382	0.001		22249	39.67
22438	36.82	65.2	0.05	0.003		22422	34.77	65.9	0.682	0.01		22762	42.78	62.82	-0.116	0.038		22695	48.9	63.45	-0.277	0.043		23058	76.9	69.08	0.289	0.008		22318	33	66.07	0.402	0.044		22271	44.13	67.88	0.552	0.002		22271	44.13	67.88	0.74	0.001		22271	44.13
22563	43.38	64.7	0.207	0.012		22438	36.82	65.2	0.22	0.002		22845	38.93	61.52	-0.025	0.034		22996	49.65	60.37	-0.215	0.008		23074	86.17	69.4	-0.528	0.003		22422	34.77	65.9	0.437	0.023		22422	34.77	65.9	0.878	0		22422	34.77	65.9	0.826	0.001		22408	31.17
22583	47.65	64.75	-0.149	0.02		22621	34.28	63.77	0.351	0.014		22887	46.72	61.27	-0.032	0.014		23146	73.58	68.47	0.834	0.007		23207	51.13	67.02	-0.217	0.028		22438	36.82	65.2	0.158	0		22438	36.82	65.2	0.204	0		22438	36.82	65.2	0.25	0		22563	43.38
22621	34.28	63.77	0.27	0.009		22648	39.23	63.12	0.244	0.023		22981	46.3	60.77	-0.04	0.001		23220	64.07	67.05	0.209	0.041		23220	64.07	67.05	0.582	0		22563	43.38	64.7	0.212	0.04		22656	41.8	63.48	0.257	0.033		22563	43.38	64.7	0.248	0.04		22621	34.28
22656	41.8	63.48	0.189	0.039		22798	49.12	62.17	-0.254	0.047		22996	49.65	60.37	-0.171	0.004		23226	64.02	67.48	0.328	0.006		23226	64.02	67.48	0.794	0		22583	47.65	64.75	-0.238	0.05		22820	34.27	61.82	-0.476	0.001		22621	34.28	63.77	0.389	0.007		22656	41.8
22820	34.27	61.82	-0.26	0.012		22820	34.27	61.82	-0.526	0		23078	88.25	69.33	-0.237	0.002		23256	78.73	67.47	0.288	0		23256	78.73	67.47	0.62	0		22768	42.9	62.1	-0.259	0.041		22912	32.98	60.98	-0.283	0.044		22656	41.8	63.48	0.325	0.02		22798	49.12
22939	37.75	60.02	0.27	0		22845	38.93	61.52	0.224	0.021		23330	66.68	66.5	-0.081	0.025		23274	86.57	67.47	0.305	0.002		23274	86.57	67.47	0.343	0.015		22820	34.27	61.82	-0.495	0.001		22939	37.75	60.02	0.395	0		22820	34.27	61.82	-0.306	0.037		22820	34.27
23074	86.17	69.4	-0.321	0.007		22887	46.72	61.27	0.244	0.049		23418	57.1	65.12	-0.084	0.022		23330	66.68	66.5	-0.197	0.028		23345	72.9	66.6	0.379	0		22939	37.75	60.02	0.253	0.044		22954	40.2	60.47	-0.275	0.037		22845	38.93	61.52	0.281	0.018		22887	46.72
23078	88.25	69.33	0.185	0.021		22939	37.75	60.02	0.377	0.003		23527	60.88	64.28	-0.144	0.025		23365	82.3	66.6	0.36	0.012		23365	82.3	66.6	0.493	0.014		23058	76.9	69.08	0.295	0.005		23058	76.9	69.08	0.31	0.002		22939	37.75	60.02	0.463	0		22939	37.75
23220	64.07	67.05	0.583	0		23058	76.9	69.08	0.257	0.026		23631	65.05	63.93	-0.067	0.036		23472	87.93	65.78	0.4	0.004		23518	57.62	64.27	-0.384	0.023		23074	86.17	69.4	-0.53	0.014		23078	88.25	69.33	0.358	0.002		23058	76.9	69.08	0.325	0.001		23058	76.9
23226	64.02	67.48	0.798	0		23074	86.17	69.4	-0.442	0.029		23707	50.42	62.23	-0.032	0.044		23606	53.82	63.55	-0.259	0.036		23606	53.82	63.55	-0.323	0.01		23078	88.25	69.33	0.206	0.032		23205	53.03	67.63	0.28	0.022		23078	88.25	69.33	0.324	0.002		23242	72.88
23256	78.73	67.47	0.672	0		23242	72.88	67.68	0.537	0.005		23724	60.87	62.43	-0.114	0		23711	56.2	62.7	-0.194	0.02		23803	53.68	61.68	-0.281	0.046		23220	64.07	67.05	0.945	0		23242	72.88	67.68	0.363	0.017		23242	72.88	67.68	0.442	0.006		23274	86.57
23274	86.57	67.47	0.389	0		23274	86.57	67.47	0.953	0		23803	53.68	61.68	-0.135	0.042		23734	66.05	62.45	-0.191	0.039		23973	89.63	61.03	0.307	0.025		23226	64.02	67.48	0.983	0		23274	86.57	67.47	0.848	0		23274	86.57	67.47	0.963	0		23330	66.68
23330	66.68	66.5	-0.274	0.003		23324	60.77	66.43	0.428	0.023		23914	56.52	60.4	-0.063	0.014		23803	53.68	61.68	-0.369	0		23986	93.03	60.38	0.528	0.003		23242	72.88	67.68	0.246	0.017		23330	66.68	66.5	-0.527	0.002		23330	66.68	66.5	-0.576	0.002		23331	65.67
23345	72.9	66.6	0.397	0		23383	93.47	66.88	0.339	0.011		23921	60.45	60.68	-0.052	0.019		23909	54.35	60.28	-0.316	0.018		24076	139.67	69.33	0.254	0.004		23256	78.73	67.47	0.931	0		23345	72.9	66.6	0.818	0		23405	52.27	65.43	0.487	0.001		23631	65.05
23707	50.42	62.23	-0.136	0.022		23405	52.27	65.43	0.573	0		23986	93.03	60.38	0.153	0.003		23929	64.22	60.32	-0.245	0.005		24538	116.92	64.23	0.142	0.03		23274	86.57	67.47	0.478	0.001		23405	52.27	65.43	0.365	0.002		23426	64.72	65.48	0.611	0.027		23701	50.9
23914	56.52	60.4	-0.242	0.001		23418	57.1	65.12	0.343	0.046		24076	139.67	69.33	0.138	0.007		23986	93.03	60.38	0.479	0		24671	135.87	63.95	0.281	0		23330	66.68	66.5	-0.381	0.01		23472	87.93	65.78	0.453	0.017		23472	87.93	65.78	0.411	0.043		23973	89.63
23955	77.87	60.43	0.097	0.044		23472	87.93	65.78	0.447	0.037		25399	169.8	66.17	-0.153	0		24076	139.67	69.33	0.24	0.007		24790	148.17	62.78	0.178	0.01		23345	72.9	66.6	0.644	0		23606	53.82	63.55	-0.46	0		23631	65.05	63.93	0.411	0.008		24343	123.4
23973	89.63	61.03	0.452	0		23514	55.4	64.52	0.329	0.023		25777	179.1	62.4	-0.053	0.026		24538	116.92	64.23	0.172	0.018		24817	108.02	61.27	0.245	0.001		23606	53.82	63.55	-0.388	0.003		23701	50.9	62.98	0.224	0.033		23701	50.9	62.98	0.258	0.027		24671	135.87
23986	93.03	60.38	0.437	0		23631	65.05	63.93	0.512	0.001		26629	23.83	54.88	-0.003	0.014		24606	103.97	63.58	0.213	0.002		24951	125.32	60.82	-0.219	0.015		23625	62.1	63.65	-0.329	0.03		23707	50.42	62.23	-0.372	0.003		23707	50.42	62.23	-0.318	0.012		24790	148.17
24076	139.67	69.33	0.113	0.016		23707	50.42	62.23	-0.436	0.001		27872	46.4	53.85	-0.011	0.044		24671	135.87	63.95	0.221	0.001		25138	164.17	68.12	0.207	0.009		23707	50.42	62.23	-0.332	0.018		23804	50.78	61.68	-0.365	0.043		23955	77.87	60.43	0.365	0.004		24802	102.7
24343	123.4	66.77	-0.228	0.005		23955	77.87	60.43	0.295	0.022		28138	58.85	58.52	-0.062	0.024		24763	134.4	62.8	0.154	0.03		25594	173.25	64.42	-0.517	0.002		23973	89.63	61.03	0.432	0.005		23955	77.87	60.43	0.357	0.002		23973	89.63	61.03	0.716	0		24856	129.15
24371	136.68	66.8	-0.729	0		23973	89.63	61.03	0.601	0.002		28144	60.78	58.87	-0.038	0.019		24790	148.17	62.78	0.17	0.011		25913	150.78	59.55	0.422	0.019		23975	88.37	60.35	-0.274	0.041		23973	89.63	61.03	0.595	0		23975	88.37	60.35	-0.286	0.027		24923	114.88
24538	116.92	64.23	0.091	0.027		24143	124	68.73	0.473	0.041		28224	56.3	58	-0.035	0.04		24817	108.02	61.27	0.198	0		25932	160.4	60.68	0.241	0.004		23986	93.03	60.38	0.695	0.001		23986	93.03	60.38	0.899	0		24076	139.67	69.33	0.21	0.014		24951	125.32
24671	135.87	63.95	-0.481	0		24343	123.4	66.77	-0.65	0.001		28409	52.2	56.43	-0.117	0.008		24923	114.88	60.72	0.194	0.005		26264	29.1	58.27	-0.242	0.005		24076	139.67	69.33	0.239	0.006		24076	139.67	69.33	0.23	0.01		24143	124	68.73	0.419	0.021		24966	134.45
24790	148.17	62.78	0.105	0.004		24382	143.23	66.45	-0.337	0.035		28434	57.78	56.65	-0.025	0.024		25034	162.3	69.62	0.142	0.035		26268	29.95	57.82	-0.153	0.034		24125	112.43	68.5	-0.206	0.047		24136	118.33	68.62	0.204	0.026		24343	123.4	66.77	-0.551	0.001		25248	168.97
24817	108.02	61.27	0.137	0.001		24538	116.92	64.23	0.263	0.011		28440	60.63	56.83	-0.025	0.023		25138	164.17	68.12	0.121	0.045		26298	34.05	57.9	-0.156	0.033		24136	118.33	68.62	0.175	0.039		24143	124	68.73	0.348	0.023		24538	116.92	64.23	0.224	0.007		25325	159.42
24951	125.32	60.82	-0.142	0.002		24724	112.5	63.03	0.261	0.049		28445	61.1	56.7	-0.045	0.037		25538	164.23	64.22	0.259	0.034		26695	34.4	55.17	-0.177	0.014		24343	123.4	66.77	-0.358	0.02		24343	123.4	66.77	-0.426	0.009		24606	103.97	63.58	0.19	0.033		25526	161.03
25248	168.97	67.25	0.172	0.002		24790	148.17	62.78	0.227	0.014		28506	52.1	55.8	-0.018	0.012		25594	173.25	64.42	-0.352	0.016		26894	33.75	53.53	-0.13	0.03		24538	116.92	64.23	0.209	0.006		24538	116.92	64.23	0.226	0.003		24661	130.3	64	0.485	0.01		25563	177.57
25282	175.8	67.83	-0.236	0.026		24802	102.7	61.7	0.268	0.044		28719	54.2	54	-0.028	0.004		25913	150.78	59.55	0.265	0.044		26896	34.73	53.75	-0.133	0.045		24598	148.03	64.17	-0.471	0.02		24606	103.97	63.58	0.213	0.016		24671	135.87	63.95	0.384	0		25594	173.25
25325	159.42	66.55	-0.106	0.014		24817	108.02	61.27	0.348	0.001		28823	57.4	53.9	-0.055	0.018		25956	169.67	60.43	-0.138	0.029		27113	38.02	59.27	0.684	0		24661	130.3	64	0.307	0.043		24661	130.3	64	0.412	0.011		24817	108.02	61.27	0.315	0.002		25656	172.7
25526	161.03	64.1	-0.19	0.015		24951	125.32	60.82	-0.274	0.021		29111	78.2	59.2	-0.045	0.046		27196	49.7	58.5	0.128	0.037		27321	38.3	57.5	-0.229	0.013		24671	135.87	63.95	0.315	0		24671	135.87	63.95	0.348	0		24923	114.88	60.72	0.497	0.012		25744	166.08
25594	173.25	64.42	-0.388	0.003		25248	168.97	67.25	0.371	0.001		29231	82.95	58.3	-0.031	0.023		27242	41.53	58.48	0.128	0.03		27402	35.87	56.88	-0.186	0.031		24790	148.17	62.78	0.166	0.021		24790	148.17	62.78	0.175	0.013		24951	125.32	60.82	-0.231	0.042		25913	150.78
25913	150.78	59.55	0.172	0.02		25282	175.8	67.83	-0.682	0.002		29313	79.43	57.57	-0.048	0.015		27271	45.53	58.37	0.138	0.049		27581	47.33	56.08	-0.19	0.011		24817	108.02	61.27	0.303	0.001		24817	108.02	61.27	0.317	0.003		24982	142.78	60.72	0.31	0.021		25916	151.35
25916	151.35	58.83	0.184	0.004		25325	159.42	66.55	-0.289	0.001		29332	83.78	57.58	-0.089	0.032		27653	43.78	55.37	-0.114	0.018		27611	36.7	55.38	-0.19	0.048		24951	125.32	60.82	-0.302	0.002		24923	114.88	60.72	0.383	0.035		25248	168.97	67.25	0.308	0.003		25922	155.88
25922	155.88	60.72	0.251	0.007		25526	161.03	64.1	-0.214	0.018		29467	90.5	56.28	-0.025	0.034		27799	49.6	54.23	-0.139	0.023		27703	36.4	54.57	-0.219	0.026		25034	162.3	69.62	0.185	0.038		25034	162.3	69.62	0.21	0.009		25325	159.42	66.55	-0.209	0.024		25956	169.67
25927	154.27	59.65	0.417	0.016		25538	164.23	64.22	-0.537	0.01		29553	89.55	56.22	-0.122	0.004		28138	58.85	58.52	-0.253	0.013		28044	60.53	59.6	0.331	0.05		25248	168.97	67.25	0.349	0.005		25248	168.97	67.25	0.216	0.044		25378	179.1	66.35	0.55	0.031		26167	29.8
25956	169.67	60.43	-0.434	0.005		25563	177.57	64.78	0.318	0.009		29605	75.97	55.2	-0.011	0.05		28216	54.68	58.08	-0.67	0.003		28138	58.85	58.52	-0.266	0.043		25526	161.03	64.1	-0.244	0.032		25325	159.42	66.55	-0.219	0.024		25526	161.03	64.1	-0.196	0.036		26997	33.77
26063	30.3	59.97	-0.053	0.046		25594	173.25	64.42	-0.747	0.023		29822	81.28	53.8	-0.016	0.018		28382	57.68	57.72	-0.404	0.001		28216	54.68	58.08	-0.948	0.002		25913	150.78	59.55	0.336	0.039		25378	179.1	66.35	0.443	0.027		25563	177.57	64.78	0.234	0.019		27026	39.33
26078	31.23	59.35	-0.383	0.002		25656	172.7	63.4	0.737	0.023		30209	102.3	57.12	-0.236	0		28383	72.4	57.52	-0.13	0.038		28326	56.93	57.42	0.384	0.036		25916	151.35	58.83	0.36	0.031		25526	161.03	64.1	-0.22	0.023		25594	173.25	64.42	-0.901	0.004		27037	39.92
26167	29.8	58.57	-0.333	0.016		25744	166.08	62.48	-0.479	0.035		30555	113.1	54.6	0.072	0.036		28440	60.63	56.83	-0.132	0.014		28498	73.65	56.45	0.372	0.022		25922	155.88	60.72	0.301	0.049		25913	150.78	59.55	0.365	0.018		25656	172.7	63.4	0.83	0.007		27108	35.63
26298	34.05	57.9	-0.076	0.03		25767	175.2	62.05	0.518	0.044		30576	119.9	54.43	-0.151	0.026		28445	61.1	56.7	-0.152	0.009		28537	57.9	55.7	0.216	0.037		25932	160.4	60.68	0.291	0		25916	151.35	58.83	0.437	0.007		25913	150.78	59.55	0.417	0.008		27199	49.32
26855	28.13	53.45	-0.268	0.046		25913	150.78	59.55	0.51	0.012		30635	109.02	53.42	-0.058	0.005		28491	72.67	56.93	-0.209	0.003		28624	55.4	55.1	0.23	0.007		26038	24.58	59.38	-0.723	0.029		25922	155.88	60.72	0.476	0.003		25916	151.35	58.83	0.497	0.007		27225	38.68
26864	29.33	53.5	-0.445	0.007		25916	151.35	58.83	0.685	0.007		30741	109.96	52.76	-0.121	0.041		28517	53.07	55.72	-0.145	0.011		28630	59.67	55.17	0.195	0.042		26063	30.3	59.97	-0.204	0.019		25927	154.27	59.65	0.776	0.023		25922	155.88	60.72	0.636	0		27485	47.88
26878	31.02	53.45	-0.62	0.003		25956	169.67	60.43	-0.944	0.017		30925	106.45	50.37	-0.028	0.014		28533	59.58	56.05	-0.336	0.034		28637	57.98	55	0.507	0.047		26298	34.05	57.9	-0.246	0.029		25932	160.4	60.68	0.354	0		25932	160.4	60.68	0.199	0.013		27532	40.35
26951	27.55	53.03	-0.239	0.04		26038	24.58	59.38	-0.88	0.025		31174	137.53	54.83	0.062	0.021		28561	65.7	56.02	-0.106	0.047		28668	66	54.77	0.301	0.024		27051	42.75	59.88	0.275	0.032		25956	169.67	60.43	-0.798	0.036		25956	169.67	60.43	-0.783	0.028		27756	43.8
26961	29.18	53.22	-0.346	0.033		26063	30.3	59.97	-0.265	0.017		31733	135.88	48.82	-0.017	0.038		28601	50.62	55.32	-0.154	0.02		28698	73.4	55	0.194	0.026		27271	45.53	58.37	0.274	0.041		26078	31.23	59.35	-0.513	0.037		26078	31.23	59.35	-0.467	0.043		27814	37.23
26966	30.03	52.9	-0.37	0.009		26069	30.13	59.35	-0.465	0.011		31969	130.8	42.65	-0.001	0.044		28611	53.2	55.32	-0.102	0.043		28712	53.73	54.58	0.22	0.05		27296	49.9	58.1	0.414	0.002		26167	29.8	58.57	-0.599	0.043		26167	29.8	58.57	-0.807	0.007		27823	39.25
27026	39.33	59.6	0.14	0.036		26853	28.98	53.83	-0.767	0.014		32076	143.8	50.4	-0.009	0.025		28661	65.4	55.47	-0.091	0.044		28952	63.61	53.21	0.196	0.041		27453	43.43	56.68	-0.503	0.031		26853	28.98	53.83	-0.73	0.036		27026	39.33	59.6	0.391	0.002		27995	49.4
27051	42.75	59.88	0.109	0.019		26855	28.13	53.45	-0.632	0.01		32088	142.03	49.07	-0.005	0.037		28710	54.92	54.08	0.218	0.008		29154	87.75	58.88	0.301	0.004		27581	47.33	56.08	-0.262	0.026		27243	42.37	58.38	0.245	0.026		27037	39.92	59.32	0.285	0.032		28064	65.72
27196	49.7	58.5	0.261	0.012		26864	29.33	53.5	-0.865	0.003		32149	142.08	45.9	-0.005	0.028		28711	52.8	54.62	-0.119	0.037		29231	82.95	58.3	0.146	0.037		27857	42.63	53.48	0.294	0.019		27283	48.35	58.3	0.284	0.02		27051	42.75	59.88	0.445	0.002		28116	54.65
27243	42.37	58.38	0.208	0.01		26896	34.73	53.75	-0.338	0.015		32547	158.3	53.1	-0.693	0		28712	53.73	54.58	0.19	0.024		29253	89.47	58.45	-0.284	0.014		28064	65.72	59.62	0.249	0.048		27296	49.9	58.1	0.545	0		27164	44.32	58.82	0.325	0.032		28144	60.78
27271	45.53	58.37	0.234	0.007		26966	30.03	52.9	-0.582	0.034		32562	156.3	52.83	-0.379	0		28722	55.83	54.72	-0.126	0.018		29282	97.45	58.38	0.327	0		28319	54.75	57.08	0.384	0.039		27385	47.92	57.37	0.235	0.02		27196	49.7	58.5	0.471	0.011		28383	72.4
27283	48.35	58.3	0.247	0.005		27008	35.93	59.4	0.309	0.039		35026	57.4	52.2	-0.044	0.012		28802	51.3	53.9	-0.074	0.046		29332	83.78	57.58	0.258	0.013		28409	52.2	56.43	0.385	0.009		27479	46.58	56.33	0.272	0.035		27199	49.32	58.52	0.316	0.031		28419	54.9
27296	49.9	58.1	0.179	0		27051	42.75	59.88	0.575	0		35127	55.6	51	-0.007	0.007		28833	59.2	53.9	-0.104	0.026		29481	95.22	56.85	0.22	0.016		28418	53.73	56.47	0.412	0.009		27491	48.73	57	0.226	0.03		27283	48.35	58.3	0.337	0.016		28434	57.78
27331	39.75	57.63	0.251	0.003		27083	48.28	59.85	0.388	0.02		35233	59.65	50.75	-0.019	0.024		28941	60.67	53.05	0.235	0.006		29539	84.4	55.67	0.376	0		28449	61.87	56.43	0.407	0.011		27595	49.3	55.8	0.333	0.031		27296	49.9	58.1	0.688	0		28440	60.63
27355	43.12	57.33	0.144	0.049		27143	42.28	59.08	0.547	0.016		36099	94.52	51.15	-0.027	0.046		29253	89.47	58.45	-0.299	0.002		29551	87.68	56.18	0.282	0.003		28493	74.38	56.9	0.421	0.004		27665	44.5	55.03	0.346	0.002		27331	39.75	57.63	0.431	0.021		28493	74.38
27385	47.92	57.37	0.08	0.045		27164	44.32	58.82	0.389	0.006		50246	124.72	52.35	-0.028	0.05		29282	97.45	58.38	0.11	0.023		29552	88.52	56.12	0.261	0.034		28537	57.9	55.7	0.342	0.006		27703	36.4	54.57	-0.313	0.023		27385	47.92	57.37	0.313	0.02		28522	56.58
27453	43.43	56.68	-0.402	0.018		27196	49.7	58.5	0.534	0.001		50639	122.73	48	-0.005	0.035		29328	82.07	57	-0.203	0.004		29576	94.3	55.82	0.298	0.012		28573	69.43	56.1	0.216	0.028		27707	35.35	54.1	0.395	0		27453	43.43	56.68	-0.855	0.004		28630	59.67
27479	46.58	56.33	0.216	0.011		27199	49.32	58.52	0.338	0.017		50844	123.42	46.4	-0.002	0.023		29332	83.78	57.58	-0.144	0.031		29580	95.3	56.2	0.269	0.007		28588	71.37	55.57	0.195	0.045		27729	39.03	54.23	0.318	0.019		27479	46.58	56.33	0.311	0.04		28679	69.15
27491	48.73	57	0.158	0.027		27243	42.37	58.38	0.301	0.015		50953	126.77	45.75	-0.005	0.045		29418	78.35	56.35	-0.114	0.048		29587	95.47	55.63	0.226	0.01		28593	74.63	56.1	0.217	0.043		27760	45.23	54.13	0.532	0.001		27491	48.73	57	0.36	0.013		28711	52.8
27532	40.35	56.12	0.171	0.047		27271	45.53	58.37	0.339	0.006		50968	127.97	45.22	-0.009	0.05		29456	89.32	56.53	-0.124	0.049		29632	83.6	55.3	0.401	0.001		28624	55.4	55.1	0.38	0.001		27814	37.23	53.65	0.566	0		27595	49.3	55.8	0.391	0.03		28786	71.75
27707	35.35	54.1	0.063	0.038		27277	45.77	57.85	0.312	0.044		51886	90.85	38.25	0	0.034		29570	92.75	56.03	-0.16	0.029		29638	82.95	54.9	0.215	0.011		28630	59.67	55.17	0.431	0.001		27817	36.53	53.38	0.276	0.018		27703	36.4	54.57	-0.423	0.03		28900	50.22
27729	39.03	54.23	0.141	0.009		27283	48.35	58.3	0.449	0.001		52652	100.43	38.93	0	0.008		29626	82.23	55.02	0.113	0.027		29645	86.22	55.25	0.483	0		28668	66	54.77	0.307	0.011		27821	38.13	54	0.313	0.01		27853	43.68	53.87	-0.592	0.018		28903	52.05
27736	40.88	54.3	0.145	0.02		27296	49.9	58.1	0.862	0		52836	98.1	36.3	-0.002	0.036		29675	93.37	55.08	-0.314	0.007		29653	89.82	55.3	0.166	0.044		28710	54.92	54.08	0.323	0.027		27823	39.25	53.78	0.326	0.009		27891	48.8	53.97	0.319	0.021		28916	54.75
27760	45.23	54.13	0.223	0.019		27331	39.75	57.63	0.397	0.019		53083	114.15	44.62	-0.006	0.037		29759	89.28	54.33	-0.613	0		29664	90.8	55.1	0.242	0.001		28786	71.75	54.37	0.237	0.006		27857	42.63	53.48	0.41	0.002		28064	65.72	59.62	0.503	0.001		29328	82.07
27814	37.23	53.65	0.123	0.008		27385	47.92	57.37	0.487	0.001		53352	110.43	41.7	-0.002	0.03		29802	76.53	53.82	-0.386	0.012		29698	99.03	54.88	0.205	0.006		28895	73.88	53.78	0.249	0.006		27891	48.8	53.97	0.419	0.001		28116	54.65	58.98	0.483	0.048		29332	83.78
27817	36.53	53.38	0.168	0.005		27425	38.8	56.7	0.298	0.045		53543	109.98	39.83	0	0.043		29848	85.92	53.47	0.172	0.035		29735	83.38	54.3	0.293	0.004		28900	50.22	53.25	0.335	0.009		27906	36	52.93	0.198	0.027		28216	54.68	58.08	-0.63	0.041		29393	99.53
27853	43.68	53.87	-0.269	0.025		27453	43.43	56.68	-0.572	0.016		53821	107.3	36.58	-0.001	0.036		30054	112.58	59.45	0.232	0.006		29816	79.55	53.62	0.223	0.002		28908	51.28	52.62	0.136	0.03		27921	38.12	53.15	0.212	0.038		28255	63.68	58.05	0.343	0.037		29541	85.62
27857	42.63	53.48	0.089	0.022		27479	46.58	56.33	0.396	0.004		54311	117.75	41.93	0.001	0.017		30151	112.9	58.85	0.611	0.022		29838	83.5	53.4	0.222	0.019		28916	54.75	52.93	0.663	0.007		27928	38.52	52.63	0.242	0.005		28312	53.82	57.63	0.429	0.002		29557	88.32
27891	48.8	53.97	0.207	0.003		27491	48.73	57	0.421	0.002		54326	119.7	41.38	0.001	0.034		30157	112.87	58.32	0.321	0.016		29848	85.92	53.47	0.546	0		28941	60.67	53.05	0.318	0.006		28064	65.72	59.62	0.375	0.002		28319	54.75	57.08	0.399	0.03		29576	94.3
27894	48.83	53.6	0.185	0.025		27549	42.03	55.6	0.285	0.041		54342	123.52	41.73	-0.001	0.028		30320	105.7	56.87	0.448	0.036		29849	87.2	53.3	0.446	0.004		28952	63.61	53.21	0.505	0.001		28116	54.65	58.98	0.452	0.039		28402	51.1	56.9	0.703	0.005		29612	78.37
27921	38.12	53.15	0.103	0.043		27595	49.3	55.8	0.356	0.05		54351	124.08	41.92	-0.001	0.034		30439	109.75	55.12	-0.265	0.019		29923	82.3	53.07	0.538	0		29154	87.75	58.88	0.377	0.003		28255	63.68	58.05	0.335	0.028		28409	52.2	56.43	0.646	0		29613	79.62
27928	38.52	52.63	0.119	0.023		27665	44.5	55.03	0.47	0.001		56038	98.1	32.98	0.009	0.015		30493	124.88	55.97	0.27	0		29939	84.95	52.68	0.407	0.001		29231	82.95	58.3	0.229	0.003		28319	54.75	57.08	0.5	0.012		28418	53.73	56.47	0.55	0.017		29631	82.75
28044	60.53	59.6	0.361	0.011		27707	35.35	54.1	0.412	0.001		56074	102.08	34	-0.005	0.017		30635	109.02	53.42	-0.129	0.016		30151	112.9	58.85	0.728	0.032		29263	92.1	58.45	0.281	0.017		28321	55.38	57.72	0.459	0.038		28419	54.9	56.27	0.557	0.005		29632	83.6
28064	65.72	59.62	0.141	0.012		27736	40.88	54.3	0.295	0.006								30822	105.85	51.72	0.119	0.01		30493	124.88	55.97	0.282	0		29282	97.45	58.38	0.476	0		28402	51.1	56.9	0.521	0.018		28434	57.78	56.65	0.349	0.012		29636	84.4
28116	54.65	58.98	0.361	0.031		27760	45.23	54.13	0.553	0.004								31285	134.42	54.5	0.324	0.008		30555	113.1	54.6	0.103	0.042		29332	83.78	57.58	0.459	0		28409	52.2	56.43	0.36	0.021		28440	60.63	56.83	0.415	0.007		29675	93.37
28216	54.68	58.08	-0.654	0.014		27823	39.25	53.78	0.35	0.037								31421	137.53	52.7	0.518	0.022		30603	102.05	53.93	0.199	0.046		29405	76.57	56.6	0.304	0.008		28434	57.78	56.65	0.289	0.025		28449	61.87	56.43	0.542	0.007		29735	83.38
28225	56.4	58	0.292	0.015		27853	43.68	53.87	-0.526	0.014								31469	132.95	51.17	0.301	0.045		30627	105.53	53.1	0.117	0.007		29430	84.92	56.5	0.214	0.044		28449	61.87	56.43	0.584	0.001		28465	66.35	56.68	0.213	0.044		29789	96.97
28319	54.75	57.08	0.395	0.005		27857	42.63	53.48	0.495	0.001								31478	133.98	52.27	0.269	0		30635	109.02	53.42	-0.295	0.002		29456	89.32	56.53	0.183	0.021		28493	74.38	56.9	0.58	0.001		28493	74.38	56.9	0.553	0.002		29807	75.45
28321	55.38	57.72	0.339	0.027		27891	48.8	53.97	0.297	0.03								31677	138.1	49.2	-0.238	0.01		30688	121.55	53.35	0.245	0.037		29524	80.03	55.85	0.217	0.019		28537	57.9	55.7	0.355	0.005		28522	56.58	56.08	0.763	0.002		29848	85.92
28402	51.1	56.9	0.148	0.048		27962	45.02	53.12	0.404	0.021								31989	133.9	42.9	0.02	0.003		30695	123.9	53.5	0.162	0.018		29532	84	56.25	0.555	0.004		28573	69.43	56.1	0.305	0.009		28537	57.9	55.7	0.433	0.001		29923	82.3
28409	52.2	56.43	0.298	0.006		28009	52.22	59.37	0.312	0.015								32014	142.5	53.57	0.253	0.014		30716	104.37	52.47	0.117	0.014		29539	84.4	55.67	0.574	0		28593	74.63	56.1	0.226	0.044		28573	69.43	56.1	0.288	0.025		29939	84.95
28418	53.73	56.47	0.195	0.005		28064	65.72	59.62	0.473	0.001								32027	141.63	52.22	0.127	0.009		30822	105.85	51.72	0.241	0		29551	87.68	56.18	0.399	0		28624	55.4	55.1	0.483	0		28593	74.63	56.1	0.3	0.011		30069	116.92
28449	61.87	56.43	0.388	0.001		28202	51.57	58.35	0.412	0.044								32077	142.58	50.23	-0.23	0.045		30843	112	51.73	0.19	0.023		29552	88.52	56.12	0.358	0.003		28629	56.95	54.9	0.823	0.002		28624	55.4	55.1	0.515	0.001		30138	108.68
28493	74.38	56.9	0.146	0.009		28216	54.68	58.08	-0.815	0.021								32174	147.88	45.25	-0.036	0.02		30949	111.97	49.57	0.042	0.032		29557	88.32	55.75	-0.337	0.016		28630	59.67	55.17	0.452	0.001		28629	56.95	54.9	0.468	0.034		30157	112.87
28498	73.65	56.45	0.312	0.026		28225	56.4	58	0.328	0.036								32363	158.7	55.9	-0.175	0.015		30965	116.52	50.4	0.058	0.048		29576	94.3	55.82	0.406	0.002		28637	57.98	55	0.662	0.025		28630	59.67	55.17	0.749	0		30209	102.3
28537	57.9	55.7	0.118	0.009		28248	61.7	57.87	0.42	0.043								32539	157.7	53.1	-0.268	0.043		31369	140.7	53.13	0.315	0.035		29580	95.3	56.2	0.339	0.003		28645	61.3	55.15	0.25	0.016		28645	61.3	55.15	0.3	0.01		30385	121.48
28624	55.4	55.1	0.133	0.002		28255	63.68	58.05	0.307	0.043								32586	158.72	52.88	-0.115	0.037		31421	137.53	52.7	0.604	0.001		29587	95.47	55.63	0.331	0.001		28668	66	54.77	0.371	0.002		28668	66	54.77	0.335	0.011		30393	124.87
28630	59.67	55.17	0.17	0.001		28275	68.25	58.15	0.261	0.026								35026	57.4	52.2	-0.234	0.014		31436	141.3	52.7	0.469	0		29605	75.97	55.2	0.271	0.005		28710	54.92	54.08	0.364	0.016		28705	51.1	54.42	0.21	0.035		30469	116.77
28645	61.3	55.15	0.126	0.046		28312	53.82	57.63	0.507	0.003								35576	69.65	48.3	-0.06	0.022		31469	132.95	51.17	0.306	0.026		29613	79.62	55.3	0.245	0.007		28711	52.8	54.62	0.315	0.026		28710	54.92	54.08	0.42	0.005		30632	108.58
28668	66	54.77	0.299	0.002		28319	54.75	57.08	0.363	0.049								36061	87.12	52.25	-0.335	0.008		31478	133.98	52.27	0.29	0.001		29625	80.97	55.1	0.245	0.001		28712	53.73	54.58	0.361	0.028		28711	52.8	54.62	0.306	0.01		30635	109.02
28679	69.15	54.83	0.366	0.011		28383	72.4	57.52	0.246	0.025								36103	96.1	52.47	-0.102	0.04		31677	138.1	49.2	-0.41	0		29626	82.23	55.02	0.254	0.007		28756	64.87	54.47	0.271	0.011		28756	64.87	54.47	0.244	0.047		30636	109.6
28710	54.92	54.08	0.401	0		28402	51.1	56.9	0.618	0.013								50514	117.43	49.57	0.034	0.013		31725	133.83	48.62	-0.132	0.042		29631	82.75	55.3	0.249	0.02		28786	71.75	54.37	0.32	0.001		28786	71.75	54.37	0.262	0.005		30682	120.87
28722	55.83	54.72	-0.08	0.044		28409	52.2	56.43	0.469	0.013								51059	85.87	47.43	0.073	0.045		31735	135.23	48.52	0.122	0.007		29632	83.6	55.3	0.555	0		28895	73.88	53.78	0.355	0.001		28823	57.4	53.9	0.31	0.039		30716	104.37
28786	71.75	54.37	0.263	0		28418	53.73	56.47	0.604	0.008								51705	75.25	39.72	-0.013	0.017		31909	136.6	45	0.16	0.049		29636	84.4	55.23	0.378	0.002		28900	50.22	53.25	0.552	0.001		28895	73.88	53.78	0.33	0.002		30727	105.42
28895	73.88	53.78	0.084	0.007		28419	54.9	56.27	0.561	0.007								52657	100.25	38.18	-0.004	0.037		32076	143.8	50.4	0.477	0.012		29638	82.95	54.9	0.363	0.002		28908	51.28	52.62	0.182	0.002		28900	50.22	53.25	0.762	0		30822	105.85
28900	50.22	53.25	0.176	0		28434	57.78	56.65	0.455	0.001								52889	103.88	36.05	-0.001	0.039		32165	145.87	44.02	0.07	0.048		29645	86.22	55.25	0.412	0.032		28916	54.75	52.93	0.813	0.001		28908	51.28	52.62	0.315	0.001		30879	119.62
28908	51.28	52.62	0.147	0.001		28440	60.63	56.83	0.304	0.045								52996	105	35.38	-0.012	0.048		32174	147.88	45.25	0.217	0.001		29649	86.8	55	0.448	0.004		28941	60.67	53.05	0.404	0.002		28916	54.75	52.93	0.84	0.002		30938	108.9
28916	54.75	52.93	0.597	0.002		28449	61.87	56.43	0.689	0								53545	109.73	39.57	0.005	0.047		32213	156.68	50.87	-0.72	0.002		29653	89.82	55.3	0.187	0.034		28952	63.61	53.21	0.504	0.002		28941	60.67	53.05	0.408	0.007		31102	125.97
28941	60.67	53.05	0.235	0.003		28493	74.38	56.9	0.559	0.003								53817	106.27	36	-0.007	0.008		32547	158.3	53.1	-0.397	0.005		29664	90.8	55.1	0.252	0.001		29154	87.75	58.88	0.369	0.007		29154	87.75	58.88	0.385	0.004		31369	140.7
29154	87.75	58.88	0.132	0.01		28522	56.58	56.08	0.741	0.004								54063	126	44.97	0.036	0.016		32586	158.72	52.88	-0.482	0		29698	99.03	54.88	0.272	0		29263	92.1	58.45	0.331	0.005		29263	92.1	58.45	0.361	0.006		31392	131.72
29263	92.1	58.45	0.099	0.029		28537	57.9	55.7	0.317	0.044								54254	124.05	42.53	0.023	0.03		33393	23.95	49.82	-0.163	0.04		29706	77.28	54.37	0.174	0.039		29282	97.45	58.38	0.594	0		29282	97.45	58.38	0.591	0		31484	135.08
29282	97.45	58.38	0.169	0		28573	69.43	56.1	0.386	0.001								54486	123.28	40.28	0.009	0.042		35229	57.15	50.28	0.266	0.007		29735	83.38	54.3	0.403	0.001		29332	83.78	57.58	0.643	0		29328	82.07	57	0.456	0.02		31594	130.08
29332	83.78	57.58	0.344	0		28593	74.63	56.1	0.367	0.005								54753	120.32	37.62	-0.001	0.037		35746	61.65	46.78	0.078	0.048		29759	89.28	54.33	-0.462	0.028		29405	76.57	56.6	0.32	0.007		29332	83.78	57.58	0.742	0		31624	133.23
29456	89.32	56.53	0.124	0.039		28624	55.4	55.1	0.447	0.007								54871	122.43	36.92	-0.002	0.001		36038	82.2	51.15	0.311	0.034		29816	79.55	53.62	0.334	0.001		29430	84.92	56.5	0.296	0.012		29405	76.57	56.6	0.433	0.001		31632	134.63
29481	95.22	56.85	0.127	0.046		28629	56.95	54.9	0.626	0.018								56038	98.1	32.98	0.013	0.028		36064	87.6	51.8	0.187	0.015		29822	81.28	53.8	0.23	0.001		29456	89.32	56.53	0.295	0.003		29430	84.92	56.5	0.263	0.045		31677	138.1
29524	80.03	55.85	0.164	0.025		28630	59.67	55.17	0.532	0								56312	94.33	29.67	-0.001	0.023		37017	39.27	44.28	0.3	0.022		29832	83.58	53.82	0.347	0.01		29481	95.22	56.85	0.245	0.009		29456	89.32	56.53	0.392	0.001		32053	143.13
29532	84	56.25	0.374	0.005		28637	57.98	55	0.633	0.032								57034	108.22	34.25	-0.004	0.011		37107	40.2	43.6	-0.246	0.02		29848	85.92	53.47	0.572	0		29524	80.03	55.85	0.241	0.019		29481	95.22	56.85	0.234	0.004		32076	143.8
29539	84.4	55.67	0.17	0		28645	61.3	55.15	0.293	0.009								57156	111.5	33.3	-0.001	0.034		479070	107	47.9	0.112	0.015		29849	87.2	53.3	0.467	0.008		29532	84	56.25	0.712	0.001		29498	98.37	56.35	0.263	0.036		32077	142.58
29551	87.68	56.18	0.189	0.006		28668	66	54.77	0.342	0.008								58506	115.98	29.58	-0.002	0.033		50434	121.68	50.48	0.126	0.008		29923	82.3	53.07	0.967	0		29539	84.4	55.67	0.646	0		29532	84	56.25	0.737	0.001		32150	142.72
29552	88.52	56.12	0.268	0.003		28710	54.92	54.08	0.398	0.017														50514	117.43	49.57	0.123	0		29937	82.77	52.52	0.251	0.006		29551	87.68	56.18	0.426	0		29539	84.4	55.67	0.475	0		32246	163.17
29557	88.32	55.75	-0.147	0.007		28786	71.75	54.37	0.36	0														50527	119.75	49.22	0.213	0		29939	84.95	52.68	0.576	0.002		29552	88.52	56.12	0.442	0.001		29541	85.62	56.07	-0.561	0.016		32252	159.17
29576	94.3	55.82	0.282	0		28799	74.8	54.17	-0.478	0														50618	118.27	48.22	0.112	0.002		30054	112.58	59.45	0.233	0.046		29557	88.32	55.75	-0.489	0.002		29551	87.68	56.18	0.453	0		32447	159.07
29580	95.3	56.2	0.13	0.004		28895	73.88	53.78	0.409	0														50632	121.92	48.77	0.13	0.001		30138	108.68	58.1	0.275	0.008		29576	94.3	55.82	0.462	0		29552	88.52	56.12	0.414	0.003		32477	155.93
29587	95.47	55.63	0.253	0		28900	50.22	53.25	0.902	0														50834	121.22	46.6	0.068	0.003		30151	112.9	58.85	0.822	0.009		29580	95.3	56.2	0.383	0.001		29557	88.32	55.75	-0.659	0.001		32586	158.72
29605	75.97	55.2	0.082	0.013		28908	51.28	52.62	0.223	0.001														50844	123.42	46.4	0.042	0.01		30320	105.7	56.87	0.737	0		29587	95.47	55.63	0.304	0.002		29576	94.3	55.82	0.513	0		33008	23.68
29625	80.97	55.1	0.146	0.035		28952	63.61	53.21	0.549	0.001														50854	125.32	46.38	0.048	0.045		30493	124.88	55.97	0.285	0		29605	75.97	55.2	0.311	0.002		29580	95.3	56.2	0.427	0.001		34152	43.15
29626	82.23	55.02	0.196	0.005		29154	87.75	58.88	0.387	0.005														50915	116.97	45.52	0.078	0.004		30514	103.02	54.17	0.159	0.039		29625	80.97	55.1	0.293	0.002		29587	95.47	55.63	0.343	0		34172	46
29631	82.75	55.3	0.187	0.016		29253	89.47	58.45	-0.224	0.04														50949	124.87	45.08	0.039	0.038		30536	109.53	54.33	0.259	0.013		29626	82.23	55.02	0.269	0.01		29605	75.97	55.2	0.361	0.001		34186	48.3
29632	83.6	55.3	0.532	0		29263	92.1	58.45	0.473	0														51053	86.4	48.05	0.159	0.008		30555	113.1	54.6	0.122	0.029		29631	82.75	55.3	0.264	0.028		29612	78.37	55.33	-0.451	0.003		35007	50.3
29636	84.4	55.23	0.285	0.001		29282	97.45	58.38	0.623	0														51059	85.87	47.43	0.337	0		30565	116.5	54.4	0.179	0.016		29632	83.6	55.3	0.74	0		29625	80.97	55.1	0.37	0.001		35127	55.6
29645	86.22	55.25	0.188	0.009		29328	82.07	57	0.478	0.012														51156	85.72	46.78	0.045	0.001		30576	119.9	54.43	0.184	0.043		29636	84.4	55.23	0.336	0.006		29626	82.23	55.02	0.295	0.008		35233	59.65
29649	86.8	55	0.415	0.001		29332	83.78	57.58	0.712	0														51330	81.02	44.97	0.1	0.008		30603	102.05	53.93	0.199	0.033		29638	82.95	54.9	0.322	0.004		29631	82.75	55.3	0.296	0.027		36103	96.1
29664	90.8	55.1	0.082	0.001		29405	76.57	56.6	0.381	0.003														51356	86.05	44.32	0.115	0.019		30612	103.07	54	0.154	0.02		29649	86.8	55	0.47	0.001		29632	83.6	55.3	0.597	0		36442	86.42
29698	99.03	54.88	0.075	0.002		29418	78.35	56.35	-0.397	0.022														51379	89.57	44.02	0.107	0.016		30627	105.53	53.1	0.178	0		29653	89.82	55.3	0.272	0.003		29636	84.4	55.23	0.273	0.041		37196	41.83
29706	77.28	54.37	0.146	0.016		29430	84.92	56.5	0.371	0.009														52436	97.03	40.27	0.011	0.042		30635	109.02	53.42	-0.283	0.006		29664	90.8	55.1	0.273	0.001		29645	86.22	55.25	0.436	0.029		37686	43.83
29735	83.38	54.3	0.407	0		29481	95.22	56.85	0.205	0.014														52446	99.52	40.3	0.003	0.008		30636	109.6	53.6	0.264	0.004		29676	94.88	55.25	0.236	0.016		29649	86.8	55	0.349	0.043		50136	122.52
29766	92.13	54.37	0.225	0.002		29532	84	56.25	0.685	0.002														52765	101.62	37.38	0.012	0.011		30682	120.87	53.87	0.165	0.041		29698	99.03	54.88	0.2	0.004		29653	89.82	55.3	0.231	0.01		50246	124.72
29816	79.55	53.62	0.277	0		29539	84.4	55.67	0.58	0														53192	114.95	44.02	0.066	0.019		30695	123.9	53.5	0.248	0		29706	77.28	54.37	0.22	0.012		29664	90.8	55.1	0.23	0.006		50639	122.73
29822	81.28	53.8	0.069	0.048		29541	85.62	56.07	-0.613	0.013														53231	106.4	41.4	0.029	0.016		30716	104.37	52.47	0.205	0		29735	83.38	54.3	0.479	0		29676	94.88	55.25	0.234	0.042		50656	126.52
29832	83.58	53.82	0.259	0.024		29551	87.68	56.18	0.389	0														53362	111.68	41.53	0.041	0.036		30727	105.42	52.03	0.087	0.018		29766	92.13	54.37	0.254	0.021		29698	99.03	54.88	0.167	0.016		51186	90.38
29848	85.92	53.47	0.441	0		29552	88.52	56.12	0.4	0.002														53391	114	41.9	0.018	0.035		30741	109.96	52.76	0.201	0.017		29816	79.55	53.62	0.44	0		29706	77.28	54.37	0.237	0.017		52323	97.03
29923	82.3	53.07	0.357	0		29557	88.32	55.75	-0.669	0.001														53446	109.85	40.67	0.01	0.046		30745	111.55	52.53	0.06	0.045		29822	81.28	53.8	0.24	0.025		29735	83.38	54.3	0.644	0		52674	101.97
29939	84.95	52.68	0.224	0.003		29562	91.67	56.1	-0.566	0.013														53782	113.55	37.85	-0.021	0.024		30758	113.48	52.08	0.123	0.008		29848	85.92	53.47	0.551	0		29759	89.28	54.33	-0.567	0.004		52754	100.13
30054	112.58	59.45	0.156	0.007		29570	92.75	56.03	-0.282	0.021														54102	116.12	43.95	0.073	0.013		30768	116.53	52	0.127	0.016		29849	87.2	53.3	0.423	0.045		29766	92.13	54.37	0.268	0.026		52983	104.15
30138	108.68	58.1	0.188	0.021		29574	92.7	56	-0.399	0.022														54161	125.22	43.9	0.089	0.021		30811	102.53	51.73	0.073	0.017		29937	82.77	52.52	0.238	0.025		29816	79.55	53.62	0.486	0		52984	103.18
30151	112.9	58.85	0.567	0.034		29576	94.3	55.82	0.46	0														54254	124.05	42.53	0.079	0.002		30822	105.85	51.72	0.385	0		29939	84.95	52.68	0.725	0.002		29832	83.58	53.82	0.335	0.049		52986	103.85
30209	102.3	57.12	-0.788	0		29580	95.3	56.2	0.428	0.002														54266	125.63	42.53	0.089	0.037		30843	112	51.73	0.211	0.003		29956	89.92	52.8	0.16	0.041		29848	85.92	53.47	0.423	0.012		52996	105
30320	105.7	56.87	0.381	0.034		29587	95.47	55.63	0.39	0														54337	121.12	41.13	0.015	0.012		30844	110.47	51.35	0.096	0.036		29962	90.92	53.05	0.093	0.039		29939	84.95	52.68	0.855	0.002		53192	114.95
30493	124.88	55.97	0.111	0.01		29605	75.97	55.2	0.335	0.01														54339	123	41.08	0.031	0.035		30853	114.32	51.63	0.099	0.041		30028	106.17	59.28	0.168	0.038		29956	89.92	52.8	0.214	0.012		53276	112.9
30618	103.77	53.13	0.135	0.032		29612	78.37	55.33	-0.311	0.032														54455	120.7	40.58	0.005	0.015		30859	114.52	51.1	0.114	0.001		30054	112.58	59.45	0.267	0.027		30028	106.17	59.28	0.167	0.042		53564	111.15
30627	105.53	53.1	0.073	0.001		29625	80.97	55.1	0.313	0.002														54705	115.38	37.37	0.013	0.034		30862	116.03	51.87	0.134	0.03		30138	108.68	58.1	0.372	0.001		30054	112.58	59.45	0.36	0.005		53646	109.78
30635	109.02	53.42	-0.127	0.006		29626	82.23	55.02	0.322	0.005														56385	103.33	29.52	-0.022	0.011		30934	107.58	50.6	0.086	0.041		30320	105.7	56.87	0.701	0		30138	108.68	58.1	0.461	0		54226	120.7
30679	119.22	53.1	0.16	0.029		29632	83.6	55.3	0.777	0														57134	107.98	33.52	-0.001	0.047		30935	108.75	50.37	0.118	0.01		30328	105.83	56.05	0.17	0.034		30151	112.9	58.85	0.677	0.031		54237	121.72
30682	120.87	53.87	0.122	0.05		29636	84.4	55.23	0.374	0.006														58238	118.8	32	0	0.025		30949	111.97	49.57	0.074	0.001		30337	107.62	56.32	0.275	0.011		30309	101.75	56.28	0.232	0.015		54324	120.45
30683	121.93	53.97	0.13	0.029		29645	86.22	55.25	0.452	0.024														58241	119.45	32.8	0.001	0.035		30965	116.52	50.4	0.116	0.001		30393	124.87	56.83	-0.405	0.008		30320	105.7	56.87	0.635	0.009		54563	122.02
30695	123.9	53.5	0.084	0.001		29649	86.8	55	0.469	0.007														58358	120.43	31.07	0	0.014		30971	117.93	50.92	0.103	0.047		30433	109.55	55.78	-0.221	0.024		30337	107.62	56.32	0.251	0.027		55437	81.25
30716	104.37	52.47	0.065	0.001		29653	89.82	55.3	0.331	0														58437	118.15	30.13	0.02	0.005		30972	118.58	50.88	0.114	0.027		30493	124.88	55.97	0.275	0		30393	124.87	56.83	-0.409	0.01		55578	88.88
30727	105.42	52.03	0.031	0.007		29664	90.8	55.1	0.393	0																				31362	140.33	53.95	0.136	0.025		30514	103.02	54.17	0.183	0.011		30437	107.62	55.15	0.16	0.043		55598	91.77
30758	113.48	52.08	0.031	0.017		29676	94.88	55.25	0.206	0.027																				31369	140.7	53.13	0.857	0		30536	109.53	54.33	0.249	0.014		30493	124.88	55.97	0.302	0.001		56079	102.97
30768	116.53	52	0.094	0.013		29698	99.03	54.88	0.264	0																				31421	137.53	52.7	0.449	0.02		30555	113.1	54.6	0.134	0.016		30514	103.02	54.17	0.257	0.002		56080	102.9
30811	102.53	51.73	0.026	0.025		29706	77.28	54.37	0.218	0.008																				31436	141.3	52.7	0.881	0		30565	116.5	54.4	0.171	0.022		30536	109.53	54.33	0.242	0.017		56357	100.3
30822	105.85	51.72	0.13	0		29735	83.38	54.3	0.52	0																				31469	132.95	51.17	0.396	0.001		30603	102.05	53.93	0.311	0.003		30603	102.05	53.93	0.382	0.001		56444	98.92
30843	112	51.73	0.131	0.005		29766	92.13	54.37	0.378	0.003																				31478	133.98	52.27	0.261	0.007		30612	103.07	54	0.187	0.005		30606	102.53	53.6	0.186	0.025		56462	101.5
30846	112.47	51.35	0.048	0.047		29816	79.55	53.62	0.506	0																				31677	138.1	49.2	-0.413	0		30618	103.77	53.13	0.182	0.05		30612	103.07	54	0.174	0.024		56543	99.7
30859	114.52	51.1	0.041	0.005		29822	81.28	53.8	0.34	0.015																				31735	135.23	48.52	0.19	0.016		30627	105.53	53.1	0.229	0		30618	103.77	53.13	0.28	0.006		58445	119.42
30874	117.57	51.65	0.094	0.039		29848	85.92	53.47	0.441	0.003																				31754	137.05	48.6	0.284	0.034		30635	109.02	53.42	-0.332	0.002		30627	105.53	53.1	0.23	0
30949	111.97	49.57	0.011	0.043		29939	84.95	52.68	0.725	0.004																				31788	134.3	47.1	0.17	0.038		30636	109.6	53.6	0.274	0.004		30635	109.02	53.42	-0.354	0.004
30965	116.52	50.4	0.025	0.02		29956	89.92	52.8	0.242	0.003																				31878	133.53	45.08	0.56	0.001		30650	112.8	53.2	0.169	0.021		30636	109.6	53.6	0.235	0.013
31285	134.42	54.5	0.189	0.028		30054	112.58	59.45	0.294	0.02																				31909	136.6	45	0.352	0.003		30695	123.9	53.5	0.286	0		30650	112.8	53.2	0.19	0.023
31369	140.7	53.13	0.33	0.001		30089	121.77	59.02	-0.589	0.004																				31913	131.98	45.22	0.238	0.048		30716	104.37	52.47	0.181	0.004		30675	118.72	53.55	0.242	0.037
31421	137.53	52.7	0.389	0.014		30138	108.68	58.1	0.443	0.003																				31915	131.38	44.4	0.184	0.023		30727	105.42	52.03	0.127	0.001		30679	119.22	53.1	0.261	0.009
31436	141.3	52.7	0.489	0		30151	112.9	58.85	0.802	0.035																				31921	132.07	44.72	0.253	0.01		30758	113.48	52.08	0.13	0.001		30682	120.87	53.87	0.269	0.002
31442	127.65	51.98	-0.425	0.005		30356	114.83	56.38	-0.554	0.019																				31931	133.1	44.8	0.291	0.011		30768	116.53	52	0.155	0.007		30683	121.93	53.97	0.183	0.025
31469	132.95	51.17	0.282	0.022		30393	124.87	56.83	-0.507	0.008																				32053	143.13	51.92	0.54	0.014		30811	102.53	51.73	0.103	0.016		30695	123.9	53.5	0.22	0.002
31478	133.98	52.27	0.127	0.009		30484	120.55	55.43	-0.416	0.021																				32076	143.8	50.4	0.764	0.011		30822	105.85	51.72	0.395	0		30703	101.98	52.97	0.204	0.046
31583	129.92	49.78	0.125	0.018		30514	103.02	54.17	0.177	0.017																				32098	143.1	49.2	0.999	0		30843	112	51.73	0.295	0		30716	104.37	52.47	0.198	0.003
31677	138.1	49.2	-0.26	0		30554	113.58	54.47	-0.361	0.023																				32174	147.88	45.25	0.637	0		30859	114.52	51.1	0.114	0.002		30727	105.42	52.03	0.077	0.015
31735	135.23	48.52	0.075	0.001		30603	102.05	53.93	0.296	0.005																				32252	159.17	58.5	0.526	0.015		30879	119.62	51.32	0.149	0.046		30766	117	52.53	0.179	0.006
31878	133.53	45.08	0.239	0.043		30618	103.77	53.13	0.213	0.026																				32447	159.07	55.12	-0.314	0.031		30935	108.75	50.37	0.111	0.02		30768	116.53	52	0.17	0.005
31909	136.6	45	0.102	0.007		30635	109.02	53.42	-0.319	0.016																				32477	155.93	54.3	-0.508	0.029		30972	118.58	50.88	0.099	0.038		30822	105.85	51.72	0.268	0
31915	131.38	44.4	0.036	0.004		30650	112.8	53.2	0.196	0.023																				32562	156.3	52.83	-0.614	0.024		30975	119.07	50.4	0.077	0.037		30829	106.65	51.1	0.067	0.019
31921	132.07	44.72	0.171	0.005		30692	123.97	54	0.179	0.026																				32586	158.72	52.88	-0.721	0		31369	140.7	53.13	0.864	0.001		30934	107.58	50.6	0.117	0.027
32014	142.5	53.57	0.652	0		30695	123.9	53.5	0.252	0.001																				33105	28.33	51.78	-0.448	0.04		31421	137.53	52.7	0.41	0.039		30935	108.75	50.37	-0.085	0.03
32053	143.13	51.92	0.296	0.005		30703	101.98	52.97	0.256	0.007																				33345	30.57	50.4	-0.795	0.004		31469	132.95	51.17	0.254	0.019		30938	108.9	49.43	0.123	0.041
32076	143.8	50.4	0.312	0.006		30727	105.42	52.03	-0.207	0.047																				34110	37.35	51.17	0.136	0.033		31478	133.98	52.27	0.255	0.009		30961	115.58	50.95	0.05	0.022
32098	143.1	49.2	0.471	0		30758	113.48	52.08	0.163	0.005																				34186	48.3	51.37	0.22	0.018		31538	132.1	50.1	0.14	0.043		30972	118.58	50.88	0.109	0.042
32174	147.88	45.25	0.229	0		30768	116.53	52	0.156	0.004																				34432	40.17	49.38	0.116	0.022		31583	129.92	49.78	0.181	0.022		30978	118.38	49.83	0.058	0.021
32213	156.68	50.87	-0.666	0		30822	105.85	51.72	0.491	0																				34730	39.82	47.27	-0.095	0.029		31677	138.1	49.2	-0.579	0		31168	138.15	56.45	0.795	0.015
32447	159.07	55.12	-0.18	0.014		30843	112	51.73	0.208	0.015																				35121	55.1	51.68	-0.213	0.038		31702	131.08	49	0.278	0.036		31285	134.42	54.5	0.468	0.014
32477	155.93	54.3	-0.29	0.006		30934	107.58	50.6	0.098	0.037																				35229	57.15	50.28	0.327	0.04		31733	135.88	48.82	0.232	0.007		31362	140.33	53.95	0.178	0.032
32547	158.3	53.1	-0.612	0		30954	112.67	49.7	-0.643	0.013																				35542	61.27	48.61	0.183	0.037		31735	135.23	48.52	0.226	0.006		31369	140.7	53.13	0.745	0.003
32562	156.3	52.83	-0.537	0		30961	115.58	50.95	0.089	0.017																				36034	81.22	51.58	-0.197	0.021		31770	140.3	49	0.596	0.009		31442	127.65	51.98	-0.765	0.001
32586	158.72	52.88	-0.409	0		30975	119.07	50.4	0.122	0.006																				36038	82.2	51.15	0.573	0.001		31788	134.3	47.1	0.192	0.037		31469	132.95	51.17	0.541	0.002
33027	27.87	52.22	-0.347	0.035		30978	118.38	49.83	0.075	0.011																				36064	87.6	51.8	0.188	0.017		31878	133.53	45.08	0.297	0.04		31478	133.98	52.27	0.268	0.008
33105	28.33	51.78	-0.29	0.028		31102	125.97	57.65	-0.539	0.003																				36096	94.5	51.72	0.137	0.009		31909	136.6	45	0.406	0.014		31484	135.08	51.42	-0.702	0.002
33345	30.57	50.4	-0.233	0.001		31168	138.15	56.45	0.686	0.035																				37018	39.07	44.1	-0.013	0.009		31915	131.38	44.4	0.096	0.043		31538	132.1	50.1	0.256	0.007
33976	35.38	45.03	0.015	0.048		31174	137.53	54.83	0.683	0.046																				37036	41.97	44.63	0.135	0.032		31921	132.07	44.72	0.346	0.001		31583	129.92	49.78	0.173	0.015
34072	46.37	52.33	0.166	0.049		31329	132.98	53.08	0.296	0.018																				37126	42.67	43.73	0.175	0.028		31924	132.07	44.43	0.217	0.033		31677	138.1	49.2	-0.765	0
34098	48.83	52.03	0.197	0.001		31478	133.98	52.27	0.345	0.001																				37597	48.05	41.67	-0.199	0.013		32053	143.13	51.92	0.454	0.043		31703	131.73	49	-0.316	0.046
34152	43.15	51.55	0.105	0.001		31484	135.08	51.42	-0.497	0.041																				457124	112.4	45.7	0.186	0.042		32076	143.8	50.4	0.771	0.013		31735	135.23	48.52	0.22	0.02
34186	48.3	51.37	0.118	0.012		31583	129.92	49.78	0.153	0.043																				477070	107	47.7	0.164	0.009		32174	147.88	45.25	0.753	0		31770	140.3	49	0.656	0.008
34432	40.17	49.38	0.038	0.026		31703	131.73	49	-0.324	0.039																				50136	122.52	52.97	0.156	0.03		32252	159.17	58.5	0.874	0.004		31845	135.3	46.53	0.393	0.006
34476	46.85	49.13	-0.063	0.021		31735	135.23	48.52	0.327	0.003																				50425	120.18	50.25	0.217	0.001		32411	155.58	55.58	0.566	0.007		31873	133.73	45.87	0.25	0.037
34662	44.7	47.93	0.183	0.003		31770	140.3	49	0.907	0.006																				50434	121.68	50.48	0.179	0.001		32447	159.07	55.12	-0.452	0.004		31895	135.5	45.45	0.28	0.038
34743	42.48	47.15	0.092	0.008		31801	136.18	47.67	0.268	0.034																				50442	124.12	50.4	0.153	0.018		32477	155.93	54.3	-0.518	0.025		31913	131.98	45.22	0.251	0.02
35229	57.15	50.28	0.116	0.023		31845	135.3	46.53	0.283	0.019																				50514	117.43	49.57	0.183	0		32547	158.3	53.1	-0.587	0.015		31921	132.07	44.72	0.201	0.034
35542	61.27	48.61	0.066	0.039		31873	133.73	45.87	0.349	0.002																				50527	119.75	49.22	0.352	0		32562	156.3	52.83	-0.644	0.024		32076	143.8	50.4	0.935	0.001
36034	81.22	51.58	-0.078	0.023		31878	133.53	45.08	0.477	0.001																				50548	123.72	49.2	0.165	0.037		32583	158.65	52.98	0.829	0.019		32174	147.88	45.25	0.586	0.016
36038	82.2	51.15	0.203	0.002		31884	134.27	45.42	0.343	0.015																				50557	125.23	49.17	0.143	0.011		32586	158.72	52.88	-0.95	0		32411	155.58	55.58	0.542	0.013
37017	39.27	44.28	0.323	0.032		31909	136.6	45	0.882	0																				50618	118.27	48.22	0.158	0.002		33027	27.87	52.22	-0.616	0.018		32447	159.07	55.12	-0.356	0.033
37018	39.07	44.1	-0.004	0.034		31915	131.38	44.4	0.197	0.028																				50632	121.92	48.77	0.165	0		33036	29.17	51.95	-0.708	0.034		32477	155.93	54.3	-0.47	0.041
37050	43	44.1	0.029	0.034		31921	132.07	44.72	0.207	0.046																				50639	122.73	48	0.056	0.01		33105	28.33	51.78	-0.585	0.013		32562	156.3	52.83	-0.583	0.008
37085	46.55	44.4	0.046	0.043		31961	131.97	43.88	0.277	0.049																				50745	123.92	47.38	0.086	0.003		33345	30.57	50.4	-0.91	0.017		34013	37.6	52.43	-0.201	0.043
37126	42.67	43.73	0.083	0.008		32246	163.17	59.3	0.563	0.005																				50756	126.97	47.43	0.157	0.001		34072	46.37	52.33	0.356	0.018		34056	43.78	52.25	0.257	0.046
37196	41.83	43.25	0.368	0.044		32477	155.93	54.3	-0.627	0.011																				50758	125.9	47.17	0.099	0.012		34083	48.08	52.5	0.986	0.003		34186	48.3	51.37	0.56	0.008
37244	46.12	43.35	-0.015	0.029		32583	158.65	52.98	0.856	0.012																				50774	128.92	47.73	0.139	0.022		34098	48.83	52.03	0.327	0.003		34321	38.1	50.22	-0.169	0.038
37461	46.25	42.4	0.209	0.043		33019	26.12	52.12	-0.422	0.047																				50775	130.27	47.33	0.095	0.047		34152	43.15	51.55	0.438	0		34579	46.73	48.22	-0.093	0.021
38507	52.98	40.03	-0.002	0.013		33027	27.87	52.22	-0.707	0.006																				50834	121.22	46.6	0.095	0.001		34186	48.3	51.37	0.513	0.001		34743	42.48	47.15	0.193	0.006
38687	63.6	39.08	-0.003	0.044		33036	29.17	51.95	-0.586	0.046																				50844	123.42	46.4	0.064	0.007		34240	42	50.8	0.227	0.027		35015	53.63	52.08	0.228	0.032
38895	62.18	37.6	-0.013	0.015		33041	30.95	52.4	-0.689	0.025																				50854	125.32	46.38	0.086	0.006		34253	43.73	50.95	0.502	0.014		35041	60.35	52.43	0.235	0.038
38933	68.78	37.82	-0.012	0.013		33105	28.33	51.78	-0.554	0.014																				50873	130.28	46.82	0.173	0.04		34476	46.85	49.13	-0.311	0.015		35663	66.75	47.83	0.338	0.01
38974	61.21	36.53	-0.012	0.019		33377	33.02	50	-0.442	0.029																				50877	129.58	46.3	0.105	0.002		34747	41.1	46.6	0.337	0.004		36034	81.22	51.58	-0.39	0.001
469028	102.8	46.9	-0.094	0.035		34056	43.78	52.25	0.305	0.013																				50888	132.18	46.32	0.154	0.001		34838	40.08	45.85	0.172	0.025		36103	96.1	52.47	-0.125	0.042
477070	107	47.7	0.103	0.02		34059	43.6	51.9	0.446	0.01																				50949	124.87	45.08	0.043	0.045		35011	53.13	52.43	0.215	0.011		36665	84.91	47.46	0.318	0.035
479070	107	47.9	0.1	0.008		34083	48.08	52.5	0.933	0.01																				51053	86.4	48.05	0.232	0		35127	55.6	51	0.189	0.044		37126	42.67	43.73	0.308	0.032
50425	120.18	50.25	0.056	0.01		34098	48.83	52.03	0.236	0.025																				51059	85.87	47.43	0.478	0		35394	73.15	49.8	0.275	0.019		37244	46.12	43.35	-0.023	0.022
50434	121.68	50.48	0.044	0.03		34139	40.7	51.05	0.244	0.028																				51068	87.47	47.12	0.173	0.003		35542	61.27	48.61	0.283	0.014		37461	46.25	42.4	0.614	0.011
50442	124.12	50.4	0.047	0.025		34152	43.15	51.55	0.606	0																				51156	85.72	46.78	0.067	0.007		36034	81.22	51.58	-0.233	0.023		37663	47.75	41.47	-0.011	0.044
50514	117.43	49.57	0.05	0		34186	48.3	51.37	0.746	0																				51241	83.6	45.93	0.151	0.021		36038	82.2	51.15	0.526	0.013		50514	117.43	49.57	0.072	0
50527	119.75	49.22	0.095	0		34240	42	50.8	0.46	0.003																				51243	84.85	45.62	0.075	0.037		36096	94.5	51.72	0.113	0.015		50632	121.92	48.77	0.083	0.002
50557	125.23	49.17	0.034	0.039		34253	43.73	50.95	0.58	0.014																				51330	81.02	44.97	0.117	0.02		36665	84.91	47.46	0.399	0.002		50639	122.73	48	0.013	0.009
50618	118.27	48.22	0.039	0.02		34356	43.7	49.8	0.264	0.029																				51356	86.05	44.32	0.198	0.012		37017	39.27	44.28	0.689	0.045		50742	124.48	47.8	0.032	0.004
50632	121.92	48.77	0.04	0.001		34438	40.38	48.93	0.29	0.041																				51365	87.53	44.2	0.133	0.008		37099	39.77	43.58	0.03	0.016		50888	132.18	46.32	0.065	0.009
50758	125.9	47.17	0.018	0.037		34743	42.48	47.15	0.429	0.001																				51379	89.57	44.02	0.207	0.002		37126	42.67	43.73	0.349	0.002		50968	127.97	45.22	-0.074	0.041
50834	121.22	46.6	0.015	0.03		34748	41.73	46.7	0.337	0.017																				51431	81.33	43.95	0.229	0.01		37196	41.83	43.25	0.966	0.038		51087	89.52	46.98	-0.275	0.019
50854	125.32	46.38	0.015	0.04		35007	50.3	51.9	0.25	0.007																				51437	81.13	43.15	0.187	0.017		37461	46.25	42.4	0.428	0.009		51133	83	46.73	-0.269	0.009
50873	130.28	46.82	0.04	0.037		35011	53.13	52.43	0.289	0.004																				51463	87.65	43.78	0.237	0.007		37686	43.83	40.78	-0.658	0.04		51186	90.38	46.67	-0.34	0.009
50877	129.58	46.3	0.017	0.024		35127	55.6	51	0.202	0.04																				51567	86.57	42.08	0.034	0.043		457124	112.4	45.7	0.166	0.027		51241	83.6	45.93	-0.202	0.001
50888	132.18	46.32	0.045	0		35233	59.65	50.75	0.319	0.017																				51644	82.97	41.72	0.039	0.023		479070	107	47.9	0.165	0.001		51346	84.67	44.43	-0.064	0.034
51053	86.4	48.05	0.065	0.005		35394	73.15	49.8	0.31	0.031																				52436	97.03	40.27	0.014	0.013		50136	122.52	52.97	0.161	0.044		52101	93.05	43.6	-0.06	0.038
51059	85.87	47.43	0.141	0		35663	66.75	47.83	0.464	0.007																				52681	103.08	38.63	0.007	0.049		50425	120.18	50.25	0.245	0		52876	102.85	36.32	-0.002	0.028
51068	87.47	47.12	0.044	0.007		36034	81.22	51.58	-0.435	0.001																				53068	111.97	43.65	0.034	0.024		50434	121.68	50.48	0.2	0.001		52889	103.88	36.05	-0.002	0.047
51156	85.72	46.78	0.017	0		36038	82.2	51.15	0.479	0.021																				53192	114.95	44.02	0.111	0.017		50442	124.12	50.4	0.194	0.003		53664	111.13	38.47	-0.004	0.042
51232	82.57	45.18	0.01	0.007		36096	94.5	51.72	0.184	0.002																				53362	111.68	41.53	0.048	0.011		50514	117.43	49.57	0.158	0		53806	105.65	36.57	-0.007	0.036
51243	84.85	45.62	0.014	0.007		36103	96.1	52.47	-0.207	0.013																				53391	114	41.9	0.028	0.008		50527	119.75	49.22	0.402	0		53853	110.95	36.7	-0.007	0.002
51330	81.02	44.97	0.03	0.031		36665	84.91	47.46	0.381	0.013																				53487	113.33	40.1	0.016	0.034		50557	125.23	49.17	0.136	0.015		54208	116.47	42.18	-0.015	0.019
51356	86.05	44.32	0.037	0.033		37061	44.1	44.8	0.211	0.013																				53663	111.82	38.92	-0.04	0.05		50618	118.27	48.22	0.159	0.005		54386	128.18	41.42	-0.072	0.038
51365	87.53	44.2	0.043	0.005		37126	42.67	43.73	0.435	0.003																				54012	117.6	44.58	0.085	0.03		50632	121.92	48.77	0.149	0		54736	118.67	37.43	-0.002	0.029
51379	89.57	44.02	0.045	0.014		37549	44.95	41.68	-0.505	0.041																				54063	126	44.97	0.085	0.033		50742	124.48	47.8	0.087	0.022		54826	117.1	36.25	-0.019	0.028
51437	81.13	43.15	0.077	0.004		38345	72.22	42.52	0.259	0.044																				54102	116.12	43.95	0.115	0.002		50745	123.92	47.38	0.044	0.037		56093	104.02	34.43	-0.007	0.005
51567	86.57	42.08	0.005	0.043		38507	52.98	40.03	-0.153	0.011																				54161	125.22	43.9	0.13	0.017		50756	126.97	47.43	0.166	0.005		56691	104.28	26.87	-0.002	0.009
52495	104.8	40.17	0.001	0.035		38687	63.6	39.08	-0.219	0.021																				54172	126.47	43.95	0.205	0.01		50758	125.9	47.17	0.092	0.017		57832	108.67	26.97	0	0.015
52908	93.08	35.22	0.002	0.026		38880	58.33	37.98	-0.369	0.01																				54236	122.53	42.42	0.021	0.037		50853	126.97	46.62	0.159	0.01		58259	120.88	31.98	-0.001	0.022
53068	111.97	43.65	0.006	0.046		38895	62.18	37.6	-0.553	0.002																				54254	124.05	42.53	0.11	0.001		50873	130.28	46.82	0.231	0.003		58556	120.82	29.6	-0.001	0.031
53192	114.95	44.02	0.024	0.012		38933	68.78	37.82	-0.309	0.021																				54259	124.92	42.1	0.145	0.02		50888	132.18	46.32	0.184	0		58562	121.57	29.87	0	0.039
53362	111.68	41.53	0.017	0.028		38974	61.21	36.53	-0.403	0.01																				54266	125.63	42.53	0.102	0.036		51053	86.4	48.05	0.227	0.001
53391	114	41.9	0.009	0		477070	107	47.7	0.177	0.009																				54339	123	41.08	0.059	0.004		51059	85.87	47.43	0.541	0
53446	109.85	40.67	0.003	0.025		50425	120.18	50.25	0.131	0.046																				54342	123.52	41.73	0.068	0.042		51068	87.47	47.12	0.168	0.004
53513	107.42	40.75	0.002	0.026		50434	121.68	50.48	0.184	0.015																				54346	123.78	41.32	0.09	0.031		51156	85.72	46.78	0.046	0.018
54102	116.12	43.95	0.019	0.025		50527	119.75	49.22	0.289	0																				54774	122.13	37.47	0.027	0.046		51379	89.57	44.02	0.195	0.004
54161	125.22	43.9	0.032	0.011		50557	125.23	49.17	0.18	0.004																				54916	116.85	35.57	-0.007	0.046		51437	81.13	43.15	0.308	0
54236	122.53	42.42	0.005	0.024		50756	126.97	47.43	0.136	0.018																				56227	95.77	29.87	-0.004	0.007		51804	75.23	37.77	0.042	0.048
54254	124.05	42.53	0.018	0.001		50758	125.9	47.17	0.093	0.025																				56312	94.33	29.67	-0.001	0.045		52313	94.67	41.53	-0.007	0.011
54259	124.92	42.1	0.026	0.04		50775	130.27	47.33	0.21	0.025																				56434	97.47	28.65	-0.002	0.027		52418	94.68	40.15	-0.004	0.005
54292	129.5	42.87	0.008	0.029		50853	126.97	46.62	0.17	0.012																				56475	102.52	28.65	-0.003	0.01		52633	98.42	38.8	-0.004	0.028
54335	122.08	41.68	0.005	0.007		50873	130.28	46.82	0.292	0.009																				57051	111.2	34.8	-0.008	0.029		52661	101.08	38.8	-0.009	0.035
54339	123	41.08	0.01	0.003		50877	129.58	46.3	0.196	0.003																				57127	107.03	33.07	-0.003	0.005		52943	99.98	35.58	0.002	0.017
54342	123.52	41.73	0.015	0.008		50888	132.18	46.32	0.213	0.004																				57143	109.97	33.87	-0.007	0.026		53149	110.13	42.53	-0.01	0.014
54405	115.5	40.4	0.001	0.042		50948	124.02	45	-0.066	0.018																				57144	109.15	33.43	-0.004	0.02		53543	109.98	39.83	-0.023	0.015
54751	120.72	37.93	-0.002	0.01		51059	85.87	47.43	0.488	0																				57156	111.5	33.3	-0.009	0.04		53602	105.67	38.83	-0.009	0.043
54765	121.4	37.53	-0.012	0.005		51068	87.47	47.12	0.175	0.004																				57399	115.02	31.18	-0.006	0.033		53615	106.7	38.8	-0.004	0.016
54826	117.1	36.25	-0.007	0.03		51156	85.72	46.78	0.09	0.05																				58259	120.88	31.98	-0.004	0.032		53663	111.82	38.92	-0.029	0.047
56227	95.77	29.87	-0.001	0		51232	82.57	45.18	0.066	0.035																				58314	116.32	31.4	-0.02	0.027		53723	107.38	37.8	-0.014	0.007
56312	94.33	29.67	-0.001	0.001		51330	81.02	44.97	0.166	0.01																				58437	118.15	30.13	0.062	0.019		53764	111.1	37.5	-0.026	0.002
56444	98.92	28.48	-0.013	0.001		51356	86.05	44.32	0.185	0.045																										53787	112.98	37.07	-0.039	0.024
56485	103.58	28.27	-0.001	0.015		51379	89.57	44.02	0.197	0.014																										53817	106.27	36	-0.016	0.038
57006	105.75	34.58	-0.001	0.041		51437	81.13	43.15	0.316	0																										53929	107.8	35.2	-0.022	0.047
57034	108.22	34.25	-0.002	0.034		51463	87.65	43.78	0.195	0.046																										54142	123.53	43.5	0.02	0.012
57067	111.03	34.05	-0.002	0.038		51804	75.23	37.77	0.104	0.009																										54161	125.22	43.9	0.085	0.032
57077	111.6	33.78	-0.004	0.011		52267	101.07	41.95	0.037	0.006																										54326	119.7	41.38	-0.01	0.004
57127	107.03	33.07	0	0.005		52754	100.13	37.33	-0.069	0.022																										54436	118.95	40.4	-0.008	0.029
57134	107.98	33.52	-0.002	0.001		52996	105	35.38	0.083	0.026																										54493	124.78	40.72	-0.052	0.027
57144	109.15	33.43	-0.001	0.001		53192	114.95	44.02	0.099	0.022																										54736	118.67	37.43	-0.011	0.044
57259	110.77	32.03	-0.001	0.039		53391	114	41.9	0.058	0.04																										54751	120.72	37.93	-0.011	0.001
57458	110.67	30.2	-0.002	0.001		53463	111.68	40.82	-0.079	0.04																										54776	122.68	37.4	-0.005	0.047
57483	113.17	30.67	-0.001	0.048		53923	107.63	35.73	-0.088	0.025																										54830	118	36.83	-0.039	0.016
58314	116.32	31.4	-0.005	0.007		53975	112.4	35.48	-0.115	0.027																										54871	122.43	36.92	-0.003	0.038
58345	119.48	31.43	-0.002	0.029		54063	126	44.97	0.099	0.038																										55664	87.08	28.63	0.001	0.044
58402	115.67	30.73	-0.001	0.047		54161	125.22	43.9	0.149	0.007																										55696	92.47	28.42	0.001	0.029
58437	118.15	30.13	0.012	0.001		54181	127.33	43.7	0.245	0.018																										56029	97.02	33.02	0.004	0.042
						54254	124.05	42.53	0.132	0.014																										56167	101.12	30.98	-0.003	0.019
						54765	121.4	37.53	-0.33	0.006																										56312	94.33	29.67	-0.003	0.007
						55294	91.1	32.35	-0.114	0																										56444	98.92	28.48	-0.038	0.018
						55664	87.08	28.63	-0.047	0.037																										57016	107.13	34.35	-0.01	0.014
						55696	92.47	28.42	-0.071	0.005																										57067	111.03	34.05	-0.007	0.03
						57006	105.75	34.58	-0.094	0.015																										57077	111.6	33.78	-0.012	0.015
						57077	111.6	33.78	-0.145	0.008																										57134	107.98	33.52	-0.006	0.002
						57127	107.03	33.07	-0.073	0.003																										57144	109.15	33.43	-0.004	0.019
						57134	107.98	33.52	-0.094	0.001																										57232	108.27	33.05	-0.001	0.019
						57144	109.15	33.43	-0.086	0.01																										57458	110.67	30.2	-0.011	0.011
						57458	110.67	30.2	-0.095	0.02																										57598	114.58	29.03	-0.01	0.033
						58437	118.15	30.13	0.199	0.008																										57606	106.83	28.13	-0.001	0.034
																																				57614	106.22	28.33	-0.004	0.004
																																				57655	110.4	28.47	-0.004	0.038
																																				57766	111.47	27.23	-0.003	0.011
																																				57774	112.17	27.45	-0.006	0.049
																																				57776	112.7	27.3	-0.073	0.03
																																				57793	114.38	27.8	-0.004	0.034
																																				57853	110.63	26.73	-0.003	0.011
																																				57972	113.03	25.8	-0.006	0.013
																																				58436	118.98	30.62	-0.017	0.009
																																				58457	120.17	30.23	-0.009	0.046
																																				58506	115.98	29.58	-0.08	0.01
																																				58549	119.65	29.12	-0.009	0.01
																																				58606	115.92	28.6	-0.007	0.017
																																				58608	115.55	28.07	-0.004	0.04
																																				58633	118.9	29	-0.008	0.038
																																				58646	119.92	28.45	-0.005	0.049
[truncated: 8 more columns]

## Sheet: mean temperature and snowfall 
station	longitude	latitude	snow depth(cm)	air temperature(℃)	snowfall(mm)
20891	102.47	71.98	27.55	-28.94	68.7
21802	114.08	71.97	25.11	-32.13	44.1
21908	113.97	70.13	32.16	-33.72	48.36
21921	127.4	70.68	39.42	-32.88	92.27
21946	147.88	70.62	26.12	-30.62	50.34
22113	33.05	68.97	20.65	-8.1	129.03
22235	37.05	67.35	40.62	-10.68	136.13
22271	44.13	67.88	41.35	-8.8	124.22
22292	48.68	67.68	16.51	-11.06	115.79
22324	34.35	66.68	48.38	-8.17	123.94
22408	31.17	65.22	41.1	-9.11	135.19
22471	44.22	65.87	32.55	-10.22	141.2
22550	40.73	64.5	30.2	-8.92	143.32
22583	47.65	64.75	48.78	-11.71	174.31
22602	30.82	63.83	38.29	-8.19	151.72
22619	33.42	63.27	25.52	-7.46	117.79
22641	38.12	63.9	33.24	-7.88	153
22676	45.63	63.58	33.66	-10.41	146.43
22768	42.9	62.1	35.94	-9.15	140.63
22802	30.72	61.72	26.06	-5.65	129.28
22837	36.45	61.02	24.45	-6.71	155.23
22845	38.93	61.52	29.15	-8.14	149.67
22854	40.18	61.67	45.09	-8.83	222.75
22887	46.72	61.27	36.08	-9.03	150.2
22981	46.3	60.77	37.44	-9.03	148.07
23074	86.17	69.4	68.08	-25.47	208.23
23205	53.03	67.63	41.93	-13.57	135.09
23219	59.38	67.08	49.05	-16.2	134.31
23256	78.73	67.47	23.78	-22.39	131.82
23274	86.57	67.47	52.16	-23.48	159.64
23324	60.77	66.43	37.02	-15.97	163.09
23330	66.68	66.5	37.75	-19.77	111.59
23331	65.67	66.9	28.69	-16.55	141.96
23383	93.47	66.88	54.16	-29.26	121.5
23405	52.27	65.43	44.04	-12.35	161.88
23412	56.92	65.97	41.14	-14.21	154.44
23418	57.1	65.12	54.8	-14.14	181.68
23445	72.67	65.47	50.91	-19.06	117.85
23472	87.93	65.78	65.77	-21.41	184.33
23527	60.88	64.28	49.19	-17.34	125.61
23552	77.82	64.92	53.72	-20.01	143.01
23631	65.05	63.93	42.57	-17	135.77
23662	82.08	63.98	54.81	-20.2	153.03
23678	87.95	63.15	63.77	-19.47	190.16
23711	56.2	62.7	54.85	-12.65	202.35
23724	60.87	62.43	40.36	-14.37	132.54
23734	66.05	62.45	59.4	-15.4	162.46
23804	50.78	61.68	52.68	-10.03	158.45
23867	80.25	61.1	45.8	-16.71	138.57
23884	90.02	61.6	65.62	-18.41	189.84
23891	96.37	61.67	63.1	-23.04	152.2
23914	56.52	60.4	56.63	-11.07	242.06
23921	60.45	60.68	32.82	-13.29	107.82
23933	69.03	61.02	36.73	-14.83	140.71
23955	77.87	60.43	37.22	-16.09	110.53
23966	84.08	60.35	55.98	-17.48	168.9
23986	93.03	60.38	67.06	-17.1	137.12
24105	102.37	68.47	26.91	-30.52	37.73
24125	112.43	68.5	31.95	-31.42	64.63
24136	118.33	68.62	32.72	-35.52	53.33
24143	124	68.73	33.8	-32.44	63.87
24266	133.4	67.57	17.38	-39.56	34.7
24329	114.28	66.25	28.92	-34.58	54.16
24343	123.4	66.77	40.75	-32.42	62.51
24382	143.23	66.45	17.08	-37.4	37.04
24507	100.23	64.27	36.14	-28.7	86.56
24606	103.97	63.58	33.27	-29.7	62.47
24641	121.62	63.78	35.22	-29.99	58.54
24661	130.3	64	30.82	-34.72	57.36
24671	135.87	63.95	18.12	-37.04	31.69
24688	143.15	63.25	23.11	-40.54	38.14
24713	108.43	62.88	36.61	-27.95	79.22
24738	117.65	62.15	30.93	-26.91	64.77
24763	134.4	62.8	29.98	-35.65	40.38
24790	148.17	62.78	16.37	-32.62	43.58
24817	108.02	61.27	36.74	-24.72	83.01
24908	102.27	60.33	40.52	-22.75	106.22
24923	114.88	60.72	45.3	-23.25	94.78
24944	120.42	60.4	33.64	-24.97	74.6
24951	125.32	60.82	26.15	-28.79	59.08
24959	129.72	62.02	24.76	-32.54	47.67
24966	134.45	60.38	35.67	-32.4	55.34
24982	142.78	60.72	25.23	-21.93	43.15
25138	164.17	68.12	22.55	-30.97	67.51
25173	179.5	68.9	54.63	-23	96.99
25206	153.72	67.45	34.89	-31.82	68.41
25248	168.97	67.25	11.95	-33.22	48
25325	159.42	66.55	32.95	-31.87	72.76
25356	173.33	66.38	25.01	-24.17	82.65
25378	179.1	66.35	20.07	-14.96	142.7
25400	150.9	65.73	31.6	-31.59	68.31
25428	160.53	65.23	32.26	-32.43	57.3
25503	153.97	64.75	39.29	-32.49	75.56
25538	164.23	64.22	39.12	-26.56	84.9
25551	170.42	64.68	51.81	-23.85	137.07
25594	173.25	64.42	47.97	-11.57	212.85
25621	158.92	64	33.24	-30.39	64.15
25703	152.42	62.92	35.83	-31.84	112.48
25705	152.32	62.45	58.85	-31.31	128.95
25744	166.08	62.48	45.43	-21.25	159.83
25954	166	60.35	28.47	-12.79	119.22
25956	169.67	60.43	52.57	-11.45	156.59
26038	24.58	59.38	9.64	-2.85	112.54
26063	30.3	59.97	14.1	-4.13	128.24
26069	30.13	59.35	16.58	-4.83	133.42
26094	33.55	59.65	26.2	-5.7	174.74
26157	27.83	58.73	12.13	-3.14	94.94
26231	24.5	58.37	7.06	-2.96	112.28
26258	28.3	57.8	12.95	-3.95	106.21
26275	31.32	58.02	10.9	-3.95	112.56
26298	34.05	57.9	22.1	-5.17	144.25
26359	28.9	57.02	13.1	-3.23	132.1
26406	21.02	56.48	4.11	-0.03	74.04
26422	24.05	56.98	5.16	-1.4	78.24
26477	30.62	56.35	9.64	-3.56	102.08
26499	34.93	56.5	14.93	-5.03	124.19
26629	23.83	54.88	4.69	-1.44	65.79
26702	20.62	54.72	6.81	0.23	91.93
26730	25.1	54.63	9	-2.23	91.09
26781	32.07	54.75	16.01	-4.53	157.78
26850	27.63	53.93	8.34	-2.76	113.4
26898	34.32	53.25	14.8	-3.93	125.69
26976	31.6	53.02	3.47	-2.98	91.45
26997	33.77	52.58	8.98	-3.6	117.77
27008	35.93	59.4	27.35	-6.58	136.5
27037	39.92	59.32	24.72	-7.46	128.78
27051	42.75	59.88	33.07	-8.12	162.98
27066	45.47	59.53	36.62	-8.53	161.78
27083	48.28	59.85	38.29	-9.1	177.42
27164	44.32	58.82	36.46	-8.03	147.78
27208	35.9	57.8	18.27	-4.64	144.64
27225	38.68	58.1	24.43	-6.57	156.03
27277	45.77	57.85	32.4	-7.71	174.29
27333	40.85	57.77	26.58	-6.42	132.36
27485	47.88	56.72	21.77	-8.04	123.86
27509	36	55.52	18.06	-5.05	134.03
27595	49.3	55.8	25.36	-8.04	130.42
27612	37.62	55.83	22.87	-5.05	154.92
27625	38.73	55.13	17.41	-5.22	117.97
27648	41.77	54.95	18.23	-6.27	151.08
27665	44.5	55.03	23.71	-6.77	156.54
27675	46.33	55.18	16.14	-7.31	98.71
27707	35.35	54.1	9.04	-4.83	119.59
27823	39.25	53.78	15.36	-6.08	108.95
27857	42.63	53.48	15.24	-6.31	121.73
27947	41.33	52.8	19.95	-5.47	131.34
27962	45.02	53.12	18.36	-6.59	117.92
27995	49.4	53	24.45	-7.57	124.44
28009	52.22	59.37	36.71	-9.85	171.89
28064	65.72	59.62	33.27	-12.51	111.38
28138	58.85	58.52	61.43	-12.01	272.45
28144	60.78	58.87	30.01	-10.93	114.95
28224	56.3	58	43.71	-9.36	166.32
28255	63.68	58.05	35.94	-11.26	116.5
28275	68.25	58.15	21.69	-13.18	104.35
28367	65.43	57.12	27.86	-11.34	101.23
28411	53.45	56.83	37.84	-9.15	136.58
28418	53.73	56.47	32.03	-9.11	157.74
28419	54.9	56.27	29.53	-9.87	112.97
28434	57.78	56.65	30.28	-10.85	132.98
28440	60.63	56.83	25.24	-9.12	101.08
28445	61.1	56.7	25.97	-9.79	116.04
28493	74.38	56.9	31.44	-13.42	96.64
28506	52.1	55.8	29.78	-8.48	133.42
28537	57.9	55.7	22.92	-10.07	110.58
28552	63.63	56.08	19.89	-10.5	99.97
28573	69.43	56.1	25.44	-12.83	78.04
28630	59.67	55.17	31.23	-9.86	166.43
28661	65.4	55.47	19.5	-11.66	81.53
28666	67.3	55.2	15.58	-12.23	80.85
28679	69.15	54.83	27.02	-12.56	92.37
28698	73.4	55	27.45	-12.49	100.81
28704	50.4	54.5	16.12	-8.64	113.22
28719	54.2	54	31.29	-9.84	174.17
28722	55.83	54.72	29.08	-9.78	162.16
28748	61.62	54.08	17.38	-10.94	85.29
28825	56	53.6	33.63	-9.64	148.38
28833	59.2	53.9	16.25	-12.07	77.15
28900	50.22	53.25	29.75	-7.54	174.1
28952	63.61	53.21	17.29	-11.81	79.41
29023	81.95	59.85	42.88	-16.23	148.01
29111	78.2	59.2	39.36	-14.67	131.86
29231	82.95	58.3	37.43	-14.66	119.14
29263	92.1	58.45	39.06	-16.62	142.63
29282	97.45	58.38	19.75	-17.18	80.42
29313	79.43	57.57	37.49	-14.16	113.51
29328	82.07	57	44.11	-13.79	104.79
29348	86.22	57.07	38.82	-13.06	108.3
29393	99.53	57.65	30.14	-17.53	64.81
29418	78.35	56.35	41.95	-13.7	107.55
29430	84.92	56.5	49.74	-12.66	169.57
29539	84.4	55.67	25.38	-12.17	122.25
29541	85.62	56.07	43.16	-12.9	154.32
29557	88.32	55.75	17.61	-11.38	72.95
29594	98	55.95	17.27	-13.07	92.32
29605	75.97	55.2	20.97	-12.96	86.31
29612	78.37	55.33	26.72	-13.45	101.04
29638	82.95	54.9	25.94	-12.24	104.29
29698	99.03	54.88	10.91	-13.87	44
29752	88.82	54.75	54.87	-12.53	597.11
29789	96.97	54.22	13.17	-14.03	28.79
29807	75.45	53.35	13.6	-12.83	67.1
29822	81.28	53.8	17.19	-12.6	76.97
29838	83.5	53.4	29.22	-11.16	97.5
29849	87.2	53.3	47.09	-10.9	156.51
29862	91.32	53.77	5.05	-12.54	31.16
29866	91.7	53.7	7.72	-12.37	40.08
29915	78.65	52.97	12.75	-12.42	93.07
29923	82.3	53.07	36.45	-11.9	99.03
29939	84.95	52.68	25.14	-11.19	145
29974	93.23	52.8	61.26	-13.89	288.92
30028	106.17	59.28	25.17	-22.68	44.22
30054	112.58	59.45	52.07	-22.48	137.44
30089	121.77	59.02	34.83	-27.06	72.99
30230	108.07	57.77	31.03	-20.51	93.27
30252	114.02	57.82	32.35	-22.44	83.42
30253	114.23	57.85	40.8	-22.95	109.19
30309	101.75	56.28	26.3	-14.6	69.19
30328	105.83	56.05	33.65	-19.75	91.93
30337	107.62	56.32	36.13	-19.18	90.76
30372	118.27	56.9	9.34	-25.94	19.46
30385	121.48	56.58	15.23	-24.21	33.7
30393	124.87	56.83	37.83	-24.96	77.92
30433	109.55	55.78	21.22	-16.17	65.43
30469	116.77	55.12	11.93	-26.4	22.07
30471	117.37	55.87	9.64	-27.81	17.66
30493	124.88	55.97	13.14	-24.24	45.07
30504	100.63	54.6	18.55	-14.32	58.08
30521	105.17	54.8	24.84	-19.94	54.91
30554	113.58	54.47	6.43	-22.25	14.71
30555	113.1	54.6	8.67	-22.87	18.4
30612	103.07	54	13.52	-17.29	44.95
30627	105.53	53.1	13.6	-15.9	32.51
30635	109.02	53.42	18.98	-14.95	95.32
30636	109.6	53.6	30.91	-18.75	86.74
30650	112.8	53.2	10	-19.91	19.45
30673	119.73	53.75	10.75	-22.26	27.61
30692	123.97	54	12.25	-21.7	28.6
30703	101.98	52.97	29.82	-16.13	79.66
30710	104.35	52.27	17.51	-12.69	64.72
30745	111.55	52.53	4.93	-17.71	18.87
30758	113.48	52.08	3.62	-18.17	18.78
30777	117.7	52.23	11.36	-20.42	25.71
30811	102.53	51.73	5.81	-18.15	21.99
30815	103.6	51.53	78.67	-12.56	225.72
30823	107.6	51.83	7.86	-16.13	28.17
30844	110.47	51.35	5.29	-18.25	30.84
30859	114.52	51.1	2.86	-16.76	18.08
30925	106.45	50.37	4.6	-13.73	21.64
30935	108.75	50.37	6.76	-18.16	22.32
30949	111.97	49.57	1.53	-14.94	11.19
30965	116.52	50.4	4.04	-18.85	16.42
31004	125.03	58.62	54.74	-22.42	148.56
31026	130.62	58.73	33.13	-26.08	73.58
31062	137.67	59.77	31.02	-30.89	54.72
31137	131.13	56.28	40.46	-31.26	53.49
31152	136.15	57.65	38.61	-27.57	72.5
31253	128.87	54.72	27.3	-22.71	45.95
31329	132.98	53.08	34.47	-23.6	65.08
31369	140.7	53.13	45.65	-17.14	206.27
31371	126	52.78	10.72	-19.78	38.67
31388	129.9	52.4	20.71	-22.09	49.26
31416	136.5	52.42	22.69	-19.73	65.29
31439	140.47	52.38	19	-17.52	110.29
31443	128.82	51.63	14.07	-20.92	41.08
31459	130.43	51.35	23.71	-21.2	60.61
31478	133.98	52.27	30.31	-24.76	60.07
31532	132.2	50.8	21.6	-23.22	50.05
31538	132.1	50.1	21.18	-19.29	56.26
31594	130.08	49.42	15.34	-18.21	56.02
31725	133.83	48.62	11.68	-15.47	58.38
31733	135.88	48.82	17.7	-14.33	77.98
31735	135.23	48.52	7.64	-14.19	72.95
31788	134.3	47.1	15.87	-14.1	63.61
31845	135.3	46.53	31.86	-15.23	117.78
31873	133.73	45.87	16.7	-12.3	67.55
31909	136.6	45	8.97	-7.04	96.63
31915	131.38	44.4	2.9	-8.69	39.8
31931	133.1	44.8	16.27	-11.25	88.52
31961	131.97	43.88	6.97	-9.77	50.11
32053	143.13	51.92	40.84	-13.24	191.22
32061	142.17	50.9	26.46	-11.59	185.17
32071	142.7	50.7	57.81	-16.1	215.56
32088	142.03	49.07	7.23	-8.04	172.17
32121	142.2	48	9.75	-7.43	267.63
32150	142.72	46.95	30.54	-7.97	181.98
32389	160.83	56.32	63.48	-12.21	268.87
32411	155.58	55.58	43.1	-9.48	214.38
32539	157.7	53.1	110.39	-14.86	340.54
33008	23.68	52.12	3.43	-0.26	61.09
33038	29.83	52.25	4	-2.21	90.25
33345	30.57	50.4	6.69	-1.07	108.93
33377	33.02	50	7.18	-2.4	126.97
33393	23.95	49.82	4.04	-0.63	96.53
33562	28.6	49.23	6.77	-1.82	98.79
33658	25.9	48.37	7.12	-0.54	79.54
33815	28.98	47.02	3.17	0.89	75.46
33889	28.85	45.22	1.4	2.16	45.62
33915	33.88	46.45	0.96	0.7	33.5
33946	34.13	44.68	1.15	3	62.97
33976	35.38	45.03	1.13	4.22	61.27
34003	36.3	52.31	14.34	-4.84	126.61
34009	36.17	51.77	11.85	-4.28	125.55
34139	40.7	51.05	10.06	-4.84	103.3
34152	43.15	51.55	13.22	-5.63	133.38
34163	45.45	51.63	22.44	-6.94	113.54
34172	46	51.6	17.53	-5.47	134.71
34186	48.3	51.37	15.88	-7.16	105.07
34202	35.77	50.8	7.99	-3.66	123.94
34240	42	50.8	9.02	-4.64	82.8
34247	41.05	50.4	6.82	-4.25	87.88
34300	36.13	49.98	6.07	-2.6	81.29
34321	38.1	50.22	7.15	-3.19	100.75
34356	43.7	49.8	7.91	-4.36	109.36
34391	48.55	50.15	7.69	-6.15	92.69
34432	40.17	49.38	4.83	-3.08	114.15
34476	46.85	49.13	8.6	-4.48	52.25
34524	38.43	48.35	6.78	-3.27	120.85
34579	46.73	48.22	3.99	-3.79	58.81
34646	42.12	47.63	2.85	-1.82	75.28
34740	41.35	46.52	2.41	-0.46	63.21
34747	41.1	46.6	5.39	-0.69	76.41
34759	43.67	46.57	2.54	-1.68	60.25
34861	44.33	46.37	3.71	-1.93	55.57
34866	45.35	46.18	1.5	-1.15	28.97
34949	42.08	45.12	4.93	-0.19	79.68
34984	47.35	45.4	0.37	0.42	15.7
35007	50.3	51.9	16.84	-7.81	135.69
35011	53.13	52.43	16.68	-8.58	107.86
35026	57.4	52.2	58.31	-10.33	196.36
35041	60.35	52.43	16.67	-11.34	102.42
35078	68.37	51.82	15.59	-13.04	90.02
35108	51.28	51.15	17.43	-8.24	89.85
35121	55.1	51.68	16.01	-8.96	107.46
35127	55.6	51	16.76	-8.94	113.96
35188	71.37	51.13	16.92	-11.65	65.13
35229	57.15	50.28	14.78	-9.51	100.53
35358	63.5	49.63	22.01	-10.44	62.13
35394	73.15	49.8	15.18	-10.1	104.53
35406	51.87	49.05	10.26	-6.47	61.61
35416	54.68	49.07	15.7	-7.49	63.59
35542	61.27	48.61	5.51	-9.87	46.2
35576	69.65	48.3	16.37	-10.48	57.27
35663	66.75	47.83	11.98	-10.07	65.19
35746	61.65	46.78	2.73	-6.85	33.5
36034	81.22	51.58	11.52	-11.29	75.2
36038	82.2	51.15	25.44	-9.54	193.02
36064	87.6	51.8	13.67	-4.82	91.43
36177	80.3	50.42	9.42	-10.17	67.24
36229	85.62	50.28	16.64	-14.09	66.53
36259	88.68	50	3.59	-19.84	12.5
36307	95.12	50.27	12.11	-23.6	29.36
36665	84.91	47.46	9.89	-10.41	61.79
36729	80.93	46.16	5.99	-6.37	73.04
36859	80.07	44.16	3.14	-2.53	29.92
36870	76.93	43.23	9.73	-2.27	111.56
36974	76	41.43	5.51	-8.95	48.94
37031	41.12	45	3.63	1.18	59.14
37050	43	44.1	4.61	-0.94	69.57
37054	43.07	44.23	2.57	-0.36	56.82
37061	44.1	44.8	2.29	0.01	68.81
37099	39.77	43.58	0.22	8.02	16.35
37126	42.67	43.73	7.44	-4.12	82.19
37228	44.7	43	4.07	-0.57	99.54
37235	45.7	43.35	3.16	0.28	52.59
37244	46.12	43.35	2.81	0.86	60.78
37471	47.12	42.82	1.74	0.84	61.07
37472	47.48	43.01	3	3.16	39.32
37549	44.95	41.68	1.55	4.37	25.53
37663	47.75	41.47	1.25	0.95	51.63
37735	46.42	40.71	0.77	4.57	13.66
37789	44.46	40.13	3.9	1.22	35.68
38198	68.21	43.27	1.82	0.07	40.11
38262	59.82	42.95	1.96	-1.22	26.75
38353	74.53	42.85	4.65	0.02	71.15
38599	69.73	40.21	0.76	3.3	18.37
38618	71.75	40.37	2.12	3.11	30.94
38687	63.6	39.08	0.42	5.16	16.94
38696	66.95	39.57	2.37	3.93	59.67
38763	56.28	38.98	1.21	4.62	27.82
38836	68.78	38.55	2.3	5.05	74.3
38880	58.33	37.98	0.78	5.89	29.09
38895	62.18	37.6	0.74	6.34	22.87
38933	68.78	37.82	1.54	6.68	27.11
38954	71.5	37.5	13.21	-1.69	94.61
38974	61.21	36.53	1.48	6.86	36.53
