# Supplementary material for: Spatiotemporal variability of snow depth across the Eurasian continent from 1966 to 2012
Source: Copernicus journal article supplement (doi:10.5194/tc-12-227-2018), 2018-01-22
Supplement: Supplementary file [file tc-12-227-2018-supplement-title-page.pdf › tc-12-227-2018-supplement-title-page.pdf]

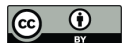

*Supplement of*

**Spatiotemporal variability of snow depth across  
the Eurasian continent from 1966 to 2012**

**Xinyue Zhong et al.**

*Correspondence to:* Xinyue Zhong (xyzhong@lzb.ac.cn) and Tingjun Zhang (tjzhang@lzu.edu.cn)

- tc-12-227-2018-supplement-title-page.pdf
- data.xlsx

The copyright of individual parts of the supplement might differ from the CC BY 3.0 License.
